# Supplementary material for: Plasma proteome profiling reveals molecular mechanisms underlying the effects of daily consumption of ‘Bahia’ and ‘Cara Cara’ orange juices
Source: Royal Society of Chemistry journal article supplement (doi:10.1039/d3fo04091g), 2024-01-01
Supplement: d3fo04091g1.zip [file d3fo04091g1.zip]

# Plasma proteome profiling reveals molecular mechanisms underlying the effects of daily consumption of 'Bahia' and 'Cara Cara' orange juices

Eric de Castro Tobaruela,<sup>a\*</sup> Elisa Brasili,<sup>b</sup> Laila Zeraik,<sup>a</sup> Dragan Milenkovic,<sup>c</sup> Neuza Mariko Aymoto Hassimotto,<sup>a</sup> and Franco Maria Lajolo<sup>a</sup>

<sup>a</sup>Department of Food and Experimental Nutrition, School of Pharmaceutical Sciences, University of São Paulo (USP), São Paulo, SP, Brazil; Food Research Center (FoRC), São Paulo, SP, Brazil.

<sup>b</sup>Department of Environmental Biology, Sapienza University of Rome, Rome, Italy.

<sup>c</sup>Department of Nutrition, University of California Davis, 95616 Davis, CA, USA.

\* Corresponding author: Eric de Castro Tobaruela, [erictobaruela@usp.br](mailto:erictobaruela@usp.br).

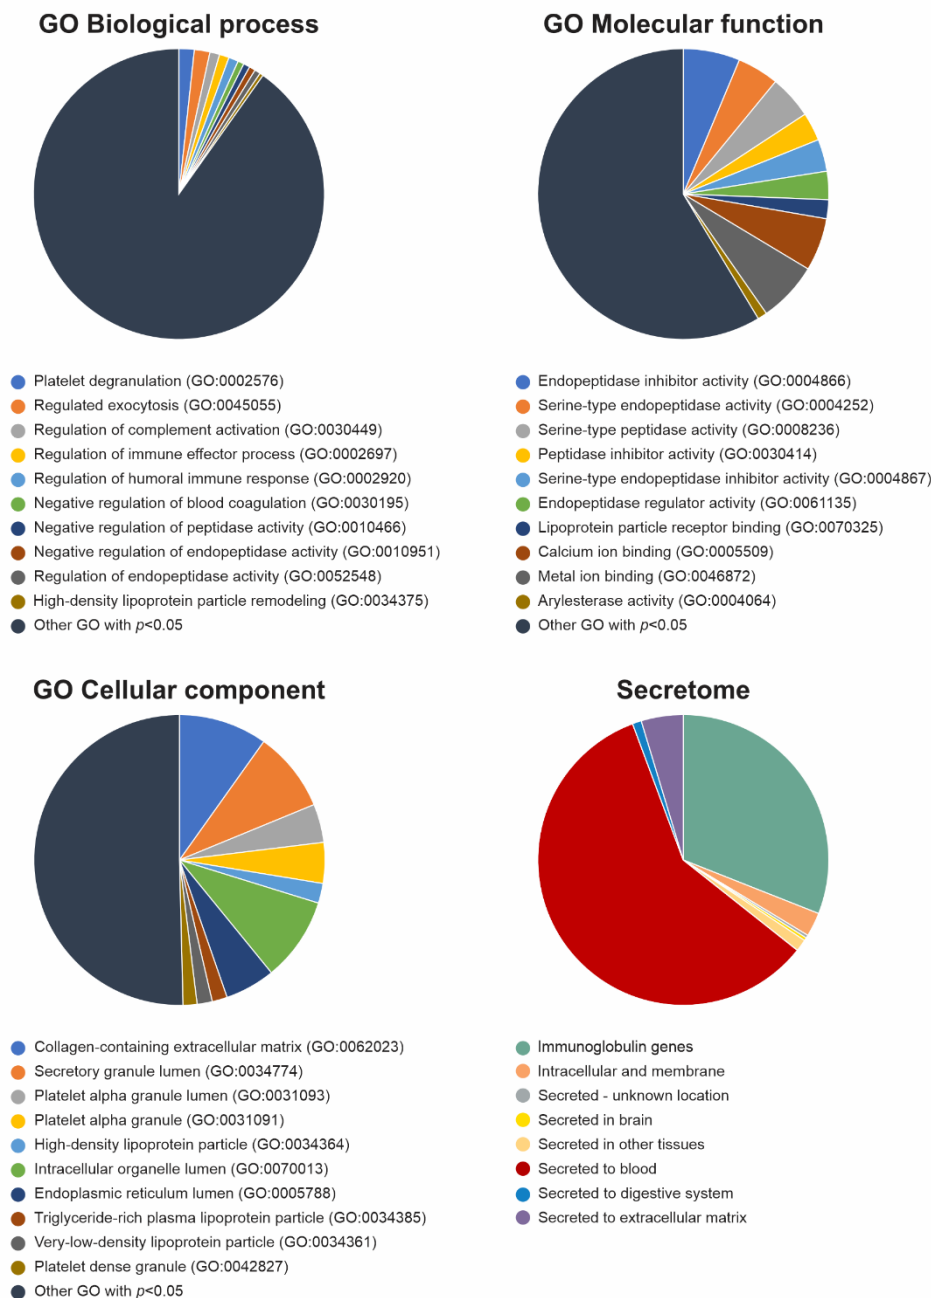

**Fig. S1** Annotation of the global plasmatic proteome. Gene ontology (GO) enrichment analysis ( $n = 387$  proteins) and secretome ( $n = 300$  proteins). All proteins were assigned to at least one GO term and were grouped into three main GO categories: Biological process; Molecular function; Cellular component. Top10 significantly enriched GO sub-categories ( $p < 0.05$ ) are shown in the pie charts.

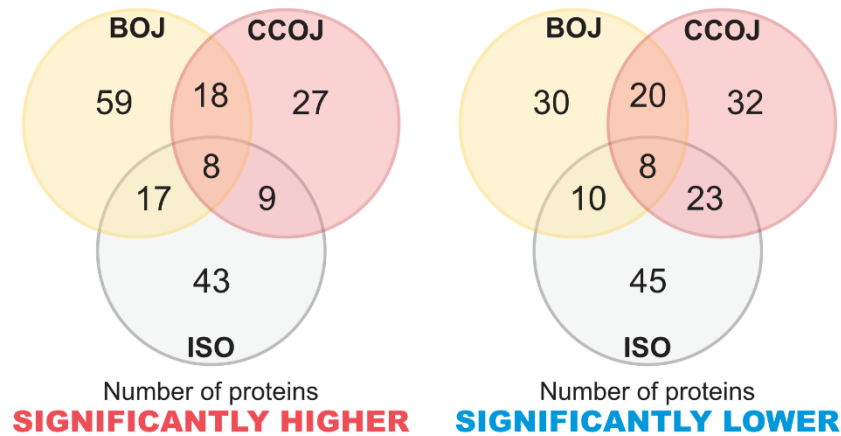

**Fig. S2** Venn diagrams showing the overlap of the 247 significantly differentially expressed proteins among BOJ, CCOJ, and ISO studies. BOJ: 'Bahia' orange juice. CCOJ: 'Cara Cara' orange juice. ISO: isocaloric control drink.

### POSITIVE CORRELATION

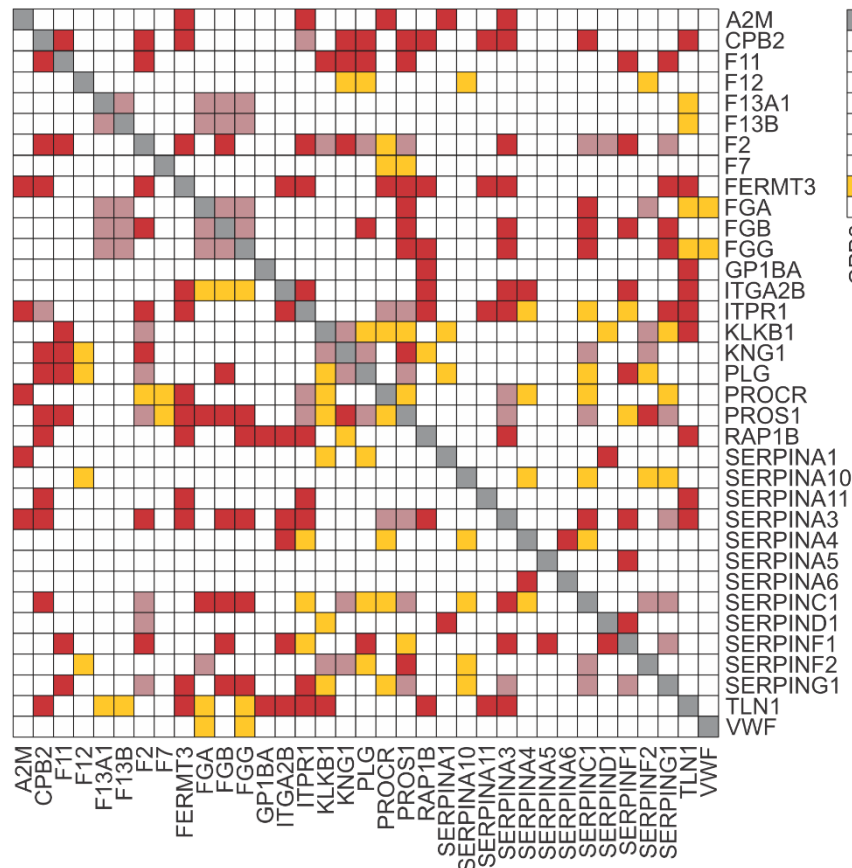

### NEGATIVE CORRELATION

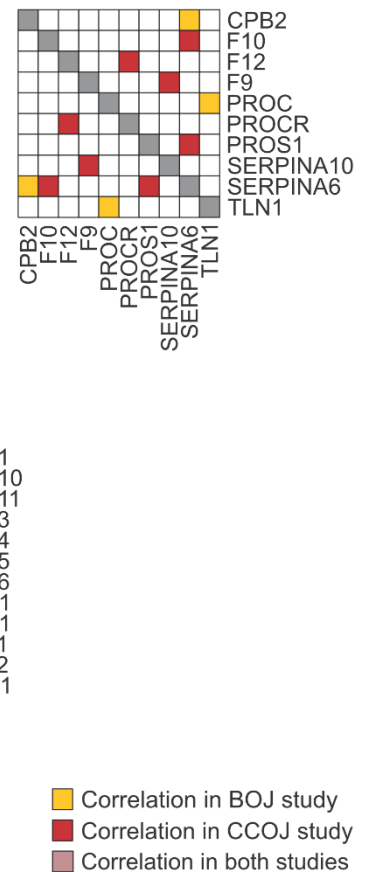

**Fig. S3** Positive and negative correlation maps of coagulation-related proteins in BOJ and CCOJ studies. BOJ: 'Bahia' orange juice. CCOJ: 'Cara Cara' orange juice. A2M: alpha-2-macroglobulin. CPB2: carboxypeptidase B2. F2: coagulation factor 2 (prothrombin). F7: coagulation factor 7. F9: coagulation factor 9. F10: coagulation factor 10. F11: coagulation factor 11. F12: coagulation factor 12. F13A1: coagulation factor 13 A chain. F13B: coagulation factor 13 B chain. FERMT3: FERM domain containing kindlin 3. FGA: fibrinogen alpha chain. FGB: fibrinogen beta chain. FGG: fibrinogen gamma chain. GP1BA: glycoprotein Ib platelet subunit alpha. ITGA2B: integrin subunit alpha 2b. ITPR1: inositol 1,4,5-trisphosphate receptor type 1. KLKB1: kallikrein B1. KNG1: kininogen 1. PLG: plasminogen. PROC: protein C, inactivator of coagulation factors Va and VIIIa. PROCR: protein C receptor. PROS1: protein S. RAP1B: Ras-related protein 1B. SERPINA1: serpin family A member 1. SERPINA3: serpin family A member 3. SERPINA4: serpin family A member 4. SERPINA5: serpin family A member 5. SERPINA6: serpin family A member 6. SERPINA10: serpin family A member 10. SERPINA11: serpin family A member 11. SERPINC1: serpin family C member 1. SERPIND1: serpin family D member 1. SERPINF1: serpin family F member 1. SERPINF2: serpin family F member 2. SERPING1: serpin family G member 1. TLN1: talin 1. VWF: von Willebrand factor.
