# Supplementary material for: Plasma proteome profiling reveals molecular mechanisms underlying the effects of daily consumption of ‘Bahia’ and ‘Cara Cara’ orange juices
Source: Royal Society of Chemistry journal article supplement (doi:10.1039/d3fo04091g), 2024-01-01
Supplement: d3fo04091g1.zip [file d3fo04091g1.zip]

## Sheet: Table S3
	Table S3 Annotation of the global plasmatic proteome. Gene ontology (GO) enrichment analysis (n = 387 proteins) . All proteins were assigned to at least one GO term at 'Biological process' category.
	Term	Overlap	P-value	Genes
	platelet degranulation (GO:0002576)	52/125	<0.001	LGALS3BP - SERPINA3 - ECM1 - ORM1 - SERPINA1 - PROS1 - ITGA2B - F13A1 - CLU - ORM2 - SERPINA4 - TMSB4X - LAMP2 - QSOX1 - FGB - ABCC4 - FGA - VWF - AHSG - ACTN1 - SERPINF2 - FGG - APOA1 - F5 - SELENOP - SERPING1 - TAGLN2 - TLN1 - ALDOA - VCL - CFD - ITIH4 - ITIH3 - PLG - A1BG - THBS1 - KNG1 - TTN - CLEC3B - APOH - FLNA - SPP2 - A2M - FN1 - IGF2 - IGF1 - PPBP - TF - ALB - HRG - FERMT3 - PF4
	regulated exocytosis (GO:0045055)	53/180	<0.001	LGALS3BP - SERPINA3 - ECM1 - ORM1 - SERPINA1 - PROS1 - ITGA2B - F13A1 - CLU - ORM2 - SERPINA4 - TMSB4X - LAMP2 - QSOX1 - FGB - ABCC4 - FGA - VWF - AHSG - ACTN1 - SERPINF2 - FGG - APOA1 - F5 - SELENOP - SERPING1 - MYH9 - TAGLN2 - TLN1 - ALDOA - VCL - CFD - ITIH4 - ITIH3 - PLG - A1BG - THBS1 - KNG1 - TTN - CLEC3B - APOH - FLNA - SPP2 - A2M - FN1 - IGF2 - IGF1 - PPBP - TF - ALB - HRG - FERMT3 - PF4
	regulation of complement activation (GO:0030449)	33/50	<0.001	C1QB - C1QA - CPB2 - C1S - CFH - C1R - PROS1 - CFI - C4BPA - C4BPB - C8B - CFP - C8A - CLU - CPN2 - C2 - CPN1 - C3 - C4A - VTN - C5 - C8G - C6 - C7 - C9 - F2 - CFHR2 - CFHR1 - CFHR4 - SERPING1 - CFHR5 - CFB - C1QC
	regulation of immune effector process (GO:0002697)	33/53	<0.001	C1QB - C1QA - CPB2 - C1S - CFH - C1R - PROS1 - CFI - C4BPA - C4BPB - C8B - CFP - C8A - CLU - CPN2 - C2 - CPN1 - C3 - C4A - VTN - C5 - C8G - C6 - C7 - C9 - F2 - CFHR2 - CFHR1 - CFHR4 - SERPING1 - CFHR5 - CFB - C1QC
	regulation of humoral immune response (GO:0002920)	33/54	<0.001	C1QB - C1QA - CPB2 - C1S - CFH - C1R - PROS1 - CFI - C4BPA - C4BPB - C8B - CFP - C8A - CLU - CPN2 - C2 - CPN1 - C3 - C4A - VTN - C5 - C8G - C6 - C7 - C9 - F2 - CFHR2 - CFHR1 - CFHR4 - SERPING1 - CFHR5 - CFB - C1QC
	negative regulation of blood coagulation (GO:0030195)	21/40	<0.001	FGB - FGA - CPB2 - F10 - F12 - F11 - FGG - SERPINF2 - PLG - GP1BA - F2 - KNG1 - VTN - F7 - PROC - APOH - SERPING1 - APOE - A2M - HRG - KLKB1
	negative regulation of peptidase activity (GO:0010466)	22/63	<0.001	SERPINA11 - SERPINA3 - ECM1 - SERPINA1 - SERPIND1 - AHSG - SERPINC1 - SERPINF1 - SERPINA10 - SERPINF2 - SERPINA6 - SERPINA7 - SERPINA4 - KNG1 - AGT - SERPINA5 - CST3 - VTN - FETUB - SERPING1 - HRG - GAPDH
	negative regulation of endopeptidase activity (GO:0010951)	21/63	<0.001	SERPINA11 - SERPINA3 - SERPINA1 - SERPIND1 - AHSG - SERPINC1 - SERPINF1 - SERPINA10 - SERPINF2 - SERPINA6 - SERPINA7 - SERPINA4 - KNG1 - AGT - SERPINA5 - VTN - FETUB - SERPING1 - HRG - GAPDH - LTF
	regulation of endopeptidase activity (GO:0052548)	20/71	<0.001	SERPINA11 - SERPINA3 - SERPINA1 - SERPIND1 - AHSG - SERPINC1 - SERPINF1 - SERPINA10 - SERPINF2 - SERPINA6 - SERPINA7 - SERPINA4 - KNG1 - AGT - SERPINA5 - VTN - FETUB - SERPING1 - HRG - GAPDH
	high-density lipoprotein particle remodeling (GO:0034375)	12/18	<0.001	CETP - APOM - APOC2 - ALB - APOC1 - APOA2 - APOA1 - APOC3 - LCAT - APOA4 - APOE - PLTP
	neutrophil mediated immunity (GO:0002446)	43/488	<0.001	CFD - PIGR - SERPINA3 - ORM1 - SERPINA1 - CRISP3 - HP - HBB - A1BG - CFP - ORM2 - C3 - CST3 - RAP1B - TTR - LAMP2 - QSOX1 - CD14 - B2M - PRSS2 - CAMP - HSPA8 - HSP90AA1 - GSN - AHSG - CARD9 - PPBP - LYZ - TUBB4B - EEF2 - PRDX6 - EEF1A1 - LRG1 - PKM - SELL - CAT - ALDOA - PPIA - S100A9 - CD44 - S100A8 - VCL - LTF
	neutrophil degranulation (GO:0043312)	42/481	<0.001	CFD - PIGR - SERPINA3 - ORM1 - SERPINA1 - CRISP3 - HP - HBB - A1BG - CFP - ORM2 - C3 - CST3 - RAP1B - TTR - LAMP2 - QSOX1 - CD14 - B2M - PRSS2 - CAMP - HSPA8 - HSP90AA1 - GSN - AHSG - PPBP - LYZ - TUBB4B - EEF2 - PRDX6 - EEF1A1 - LRG1 - PKM - SELL - CAT - ALDOA - PPIA - S100A9 - CD44 - S100A8 - VCL - LTF
	neutrophil activation involved in immune response (GO:0002283)	42/485	<0.001	CFD - PIGR - SERPINA3 - ORM1 - SERPINA1 - CRISP3 - HP - HBB - A1BG - CFP - ORM2 - C3 - CST3 - RAP1B - TTR - LAMP2 - QSOX1 - CD14 - B2M - PRSS2 - CAMP - HSPA8 - HSP90AA1 - GSN - AHSG - PPBP - LYZ - TUBB4B - EEF2 - PRDX6 - EEF1A1 - LRG1 - PKM - SELL - CAT - ALDOA - PPIA - S100A9 - CD44 - S100A8 - VCL - LTF
	complement activation, classical pathway (GO:0006958)	09/09	<0.001	C1QB - CRP - APCS - C1QA - IGLL5 - C1S - C1R - IGLL1 - C1QC
	cellular protein metabolic process (GO:0044267)	37/417	<0.001	SERPINA1 - ITIH2 - SERPINC1 - SERPINA10 - PCSK9 - PLG - KNG1 - HSP90B1 - C3 - CST3 - C4A - SPP2 - QSOX1 - APOE - IGFBP6 - APOB - APOL1 - CDKL3 - FGA - SERPIND1 - AHSG - IGFBP4 - IGFBP3 - FGG - FN1 - IGF2 - APOA2 - APOA1 - IGF1 - F2 - CP - F5 - EEF1A1 - TF - PROC - ALB - IGFALS
	humoral immune response mediated by circulating immunoglobulin (GO:0002455)	09/11	<0.001	C1QB - CRP - APCS - C1QA - IGLL5 - C1S - C1R - IGLL1 - C1QC
	platelet aggregation (GO:0070527)	13/36	<0.001	FGB - FGA - ACTN1 - FGG - FN1 - HBB - GP1BA - FLNA - MYH9 - TLN1 - PPIA - VCL - FERMT3
	zymogen activation (GO:0031638)	14/45	<0.001	FGB - FGA - C1R - F12 - CD5L - F11 - FGG - HP - HPR - F9 - APOH - C1RL - KLKB1 - HGFAC
	reverse cholesterol transport (GO:0043691)	10/17	<0.001	CETP - APOM - APOC2 - APOA2 - APOA1 - APOC3 - LCAT - APOA4 - APOE - CLU
	regulation of fibrinolysis (GO:0051917)	09/13	<0.001	F12 - APOH - F11 - SERPINF2 - PLG - F2 - HRG - THBS1 - KLKB1
	triglyceride-rich lipoprotein particle remodeling (GO:0034370)	09/13	<0.001	CETP - APOC2 - APOA2 - APOA1 - APOC3 - LCAT - APOA4 - APOE - APOB
	homotypic cell-cell adhesion (GO:0034109)	13/44	<0.001	FGB - FGA - ACTN1 - FGG - FN1 - HBB - GP1BA - FLNA - MYH9 - TLN1 - PPIA - VCL - FERMT3
	fibrinolysis (GO:0042730)	09/15	<0.001	FGB - FGA - CPB2 - FGG - SERPINF2 - GP1BA - PLG - F2 - HRG
	killing by host of symbiont cells (GO:0051873)	09/16	<0.001	CFHR2 - CFHR1 - CFHR5 - F2 - APOL1 - HRG - GAPDH - CAMP - PF4
	amyloid fibril formation (GO:1990000)	14/63	<0.001	FGA - APCS - GSN - H4-16 - APOA1 - APOA4 - LYZ - HSPG2 - CST3 - TTR - SAA1 - TGFBI - B2M - LTF
	post-translational protein modification (GO:0043687)	29/345	<0.001	SERPINA1 - ITIH2 - SERPINC1 - SERPINA10 - PCSK9 - KNG1 - HSP90B1 - C3 - CST3 - C4A - SPP2 - QSOX1 - APOE - APOB - APOL1 - FGA - SERPIND1 - AHSG - IGFBP4 - IGFBP3 - FGG - FN1 - APOA2 - APOA1 - CP - F5 - TF - PROC - ALB
	chylomicron remodeling (GO:0034371)	07/09	<0.001	APOC2 - APOA2 - APOA1 - APOC3 - APOA4 - APOE - APOB
	innate immune response (GO:0045087)	27/302	<0.001	CFD - CRP - APCS - FCN2 - FCN3 - PGLYRP2 - CRISP3 - CFP - JCHAIN - C3 - LBP - APOL1 - B2M - CAMP - MBL2 - F12 - CARD9 - APOA4 - IGLL5 - IGLL1 - SAA1 - CFHR5 - MASP2 - ANG - MASP1 - CFB - LTF
	regulation of blood coagulation (GO:0030193)	10/27	<0.001	VTN - PROC - APOH - F12 - GP1BA - APOE - F2 - HRG - THBS1 - KNG1
	chylomicron assembly (GO:0034378)	07/10	<0.001	APOC2 - APOA2 - APOA1 - APOC3 - APOA4 - APOE - APOB
	cholesterol transport (GO:0030301)	12/51	<0.001	CETP - APOM - APOC2 - APOC1 - APOA2 - APOA1 - LCAT - APOC3 - APOA4 - APOE - APOB - CLU
	receptor-mediated endocytosis (GO:0006898)	18/143	<0.001	CD163 - HSP90AA1 - TFRC - AMBP - HP - HBB - APOA1 - HPR - HSPG2 - HSP90B1 - JCHAIN - HPX - ALB - SAA1 - MASP1 - APOE - APOB - APOL1
	phospholipid efflux (GO:0033700)	07/12	<0.001	APOC2 - APOC1 - APOA2 - APOA1 - APOC3 - APOA4 - APOE
	extracellular matrix organization (GO:0030198)	25/300	<0.001	ITGA2B - PLG - THBS1 - FBLN5 - COMP - VTN - ADAMTS13 - TTR - QSOX1 - A2M - PRSS2 - FGB - FGA - GSN - VWF - LUM - SERPINF2 - FGG - FN1 - HSPG2 - COL6A3 - TGFBI - LCP1 - KLKB1 - CD44
	acute inflammatory response (GO:0002526)	09/27	<0.001	CRP - APCS - ITIH4 - AHSG - HP - SAA1 - HPR - LBP - MBL2
	cytolysis by host of symbiont cells (GO:0051838)	06/09	<0.001	CFHR2 - CFHR1 - CFHR5 - APOL1 - F2 - HRG
	cytolysis in other organism involved in symbiotic interaction (GO:0051801)	06/09	<0.001	CFHR2 - CFHR1 - CFHR5 - APOL1 - F2 - HRG
	very-low-density lipoprotein particle remodeling (GO:0034372)	06/09	<0.001	CETP - APOC2 - APOA1 - LCAT - APOA4 - APOE
	negative regulation of fibrinolysis (GO:0051918)	06/09	<0.001	APOH - SERPINF2 - PLG - F2 - HRG - THBS1
	negative regulation of protein activation cascade (GO:2000258)	06/09	<0.001	F7 - F10 - F12 - SERPING1 - A2M - KLKB1
	plasminogen activation (GO:0031639)	06/09	<0.001	FGB - FGA - APOH - F11 - FGG - KLKB1
	positive regulation of cholesterol esterification (GO:0010873)	06/09	<0.001	APOC1 - APOA2 - APOA1 - APOA4 - APOE - AGT
	acute-phase response (GO:0006953)	07/15	<0.001	CRP - APCS - ITIH4 - AHSG - SAA1 - LBP - MBL2
	defense response to bacterium (GO:0042742)	18/176	<0.001	CRP - FCN2 - PGLYRP2 - HLA-A - CFP - LYZ - JCHAIN - IGLL5 - TF - IGLL1 - ANG - LBP - S100A9 - OPTN - S100A8 - CAMP - MBL2 - LTF
	cholesterol efflux (GO:0033344)	08/24	<0.001	APOM - APOC2 - APOC1 - APOA2 - APOA1 - APOC3 - APOA4 - APOE
	acylglycerol homeostasis (GO:0055090)	08/25	<0.001	CETP - PNPLA8 - APOC2 - APOC4 - APOA1 - APOC3 - APOA4 - APOE
	positive regulation of blood coagulation (GO:0030194)	07/17	<0.001	F12 - APOH - SERPINF2 - PLG - F2 - HRG - THBS1
	diterpenoid metabolic process (GO:0016101)	11/64	<0.001	RBP4 - APOM - TTR - APOC2 - APOA2 - APOA1 - APOC3 - APOA4 - APOE - APOB - HSPG2
	regulation of cholesterol esterification (GO:0010872)	06/12	<0.001	APOC1 - APOA2 - APOA1 - APOA4 - APOE - AGT
	chylomicron remnant clearance (GO:0034382)	05/07	<0.001	APOC2 - APOC1 - APOC3 - APOE - APOB
	complement activation, alternative pathway (GO:0006957)	05/07	<0.001	C3 - CFD - CFHR5 - CFP - CFB
	positive regulation of steroid metabolic process (GO:0045940)	06/13	<0.001	APOC1 - APOA2 - APOA1 - APOA4 - APOE - AGT
	triglyceride homeostasis (GO:0070328)	08/31	<0.001	CETP - PNPLA8 - APOC2 - APOC4 - APOA1 - APOC3 - APOA4 - APOE
	cholesterol homeostasis (GO:0042632)	11/71	<0.001	CETP - APOM - APOC2 - APOA2 - PCSK9 - APOA1 - LCAT - APOC3 - APOA4 - APOE - APOB
	sterol homeostasis (GO:0055092)	11/72	<0.001	CETP - APOM - APOC2 - APOA2 - PCSK9 - APOA1 - LCAT - APOC3 - APOA4 - APOE - APOB
	protein processing (GO:0016485)	13/106	<0.001	C1R - F12 - CD5L - HP - PCSK9 - HPR - CPN1 - F7 - ADAMTS13 - F9 - C1RL - KLKB1 - HGFAC
	negative regulation of coagulation (GO:0050819)	06/14	<0.001	PROCR - VTN - PROC - APOH - APOE - KNG1
	retina homeostasis (GO:0001895)	08/36	<0.001	PIGR - AZGP1 - TF - ALB - LYZ - B2M - JCHAIN - LTF
	supramolecular fiber organization (GO:0097435)	23/351	<0.001	APCS - FGA - TNXB - GSN - TPM4 - TPM3 - LUM - ACTN1 - SERPINF2 - H4-16 - APOA1 - APOA4 - LYZ - HSPG2 - FBLN5 - CST3 - TTR - SAA1 - COL6A3 - TGFBI - ALDOA - B2M - LTF
	antimicrobial humoral immune response mediated by antimicrobial peptide (GO:0061844)	10/64	<0.001	ANG - PPBP - F2 - HRG - GAPDH - S100A9 - CAMP - PF4V1 - LTF - PF4
	complement activation, lectin pathway (GO:0001867)	05/10	<0.001	FCN2 - FCN3 - MASP2 - MASP1 - MBL2
	regulation of receptor-mediated endocytosis (GO:0048259)	08/39	<0.001	C3 - VTN - TF - APOC2 - APOC1 - APOC3 - CLU - B2M
	regulation of blood coagulation, intrinsic pathway (GO:2000266)	04/05	<0.001	F12 - SERPING1 - A2M - KLKB1
	negative regulation of blood coagulation, intrinsic pathway (GO:2000267)	04/05	<0.001	F12 - SERPING1 - A2M - KLKB1
	extracellular structure organization (GO:0043062)	17/216	<0.001	FGB - FGA - VWF - LUM - ITGA2B - FGG - FN1 - HSPG2 - THBS1 - FBLN5 - COMP - VTN - ADAMTS13 - TTR - COL6A3 - TGFBI - CD44
	regulation of coagulation (GO:0050818)	05/11	<0.001	PROCR - PROC - GP1BA - F2 - HRG
	external encapsulating structure organization (GO:0045229)	17/217	<0.001	FGB - FGA - VWF - LUM - ITGA2B - FGG - FN1 - HSPG2 - THBS1 - FBLN5 - COMP - VTN - ADAMTS13 - TTR - COL6A3 - TGFBI - CD44
	positive regulation of protein processing (GO:0010954)	06/20	<0.001	CLEC3B - GSN - F12 - MYH9 - ENO1 - KLKB1
	retinoid metabolic process (GO:0001523)	11/92	<0.001	RBP4 - APOM - TTR - APOC2 - APOA2 - APOA1 - APOC3 - APOA4 - APOE - APOB - HSPG2
	antibacterial humoral response (GO:0019731)	08/44	<0.001	FGB - FGA - TF - ANG - HLA-A - CAMP - JCHAIN - LTF
	regulation of plasminogen activation (GO:0010755)	05/12	<0.001	CLEC3B - F12 - SERPINF2 - ENO1 - THBS1
	regulation of triglyceride catabolic process (GO:0010896)	05/12	<0.001	APOC2 - APOA1 - APOC3 - APOA4 - GPLD1
	modulation by host of viral process (GO:0044788)	05/12	<0.001	CRP - APCS - CFL1 - APOE - LTF
	negative regulation of hemostasis (GO:1900047)	05/12	<0.001	VTN - PROC - APOH - APOE - KNG1
	regulation of very-low-density lipoprotein particle remodeling (GO:0010901)	04/06	<0.001	APOC2 - APOA2 - APOA1 - APOC3
	negative regulation of lipoprotein particle clearance (GO:0010985)	04/06	<0.001	APOC2 - APOC1 - APOC3 - PCSK9
	regulation of lipoprotein lipase activity (GO:0051004)	06/21	<0.001	APOC2 - APOH - APOC1 - APOA1 - APOC3 - APOA4
	hydrogen peroxide catabolic process (GO:0042744)	06/21	<0.001	PRDX2 - GPX3 - CAT - HBB - APOA4 - HBD
	phosphatidylcholine metabolic process (GO:0046470)	10/77	<0.001	CETP - PNPLA8 - CSNK2A2 - PON1 - ENPP2 - APOA2 - APOA1 - LCAT - APOA4 - GPLD1
	pattern recognition receptor signaling pathway (GO:0002221)	09/61	<0.001	FGB - FGA - FGG - LBP - CD14 - APOB - S100A9 - S100A8 - HSP90B1
	high-density lipoprotein particle assembly (GO:0034380)	05/13	<0.001	APOM - APOA2 - APOA1 - APOA4 - APOE
	cell-matrix adhesion (GO:0007160)	11/100	<0.001	FGB - VTN - FGA - ADAMTS13 - ACTN1 - FGG - FN1 - VCL - FBLN5 - CD44 - FERMT3
	secondary alcohol metabolic process (GO:1902652)	08/49	<0.001	CETP - APOA2 - APOF - APOA1 - LCAT - APOA4 - APOE - APOB
	low-density lipoprotein particle remodeling (GO:0034374)	05/14	<0.001	CETP - APOA2 - APOB - LPA - AGT
	defense response to fungus (GO:0050832)	06/24	<0.001	CARD9 - HRG - GAPDH - S100A9 - S100A8 - LTF
	regulation of cholesterol transport (GO:0032374)	06/25	<0.001	CETP - APOC2 - APOC1 - APOA2 - APOA1 - APOA4
	regulation of heterotypic cell-cell adhesion (GO:0034114)	06/25	<0.001	FGB - FGA - ADIPOQ - FGG - APOA1 - CD44
	positive regulation of lipid metabolic process (GO:0045834)	06/25	<0.001	ADIPOQ - APOA2 - APOA1 - APOA4 - APOE - F2
	defense response to Gram-positive bacterium (GO:0050830)	09/70	<0.001	CRP - FCN2 - PGLYRP2 - ANG - LBP - HLA-A - LYZ - CAMP - MBL2
	positive regulation of lipoprotein lipase activity (GO:0051006)	04/08	<0.001	APOC2 - APOH - APOA1 - APOA4
	lipoprotein metabolic process (GO:0042157)	04/09	<0.001	APOA2 - APOA1 - APOA4 - APOE
	synapse pruning (GO:0098883)	04/09	<0.001	C1QB - C3 - C1QA - C1QC
	positive regulation of triglyceride lipase activity (GO:0061365)	04/09	<0.001	APOC2 - APOH - APOA1 - APOA4
	regulation of fatty acid biosynthetic process (GO:0042304)	06/29	<0.001	APOC2 - ADIPOQ - APOC1 - APOA1 - APOC3 - APOA4
	hydrogen peroxide metabolic process (GO:0042743)	06/29	<0.001	PRDX2 - GPX3 - CAT - HBB - APOA4 - HBD
	negative regulation of wound healing (GO:0061045)	06/29	<0.001	APCS - VTN - PROC - APOH - APOE - KNG1
	phospholipid transport (GO:0015914)	08/59	<0.001	APOC2 - APOC1 - APOA2 - APOA1 - APOC3 - APOA4 - APOE - PLTP
	negative regulation of cellular component organization (GO:0051129)	09/80	<0.001	HSPA8 - APOM - HSPA5 - PON1 - APOA2 - APOA1 - APOC3 - APOA4 - CLU
	regulation of macrophage derived foam cell differentiation (GO:0010743)	06/31	<0.001	CRP - CETP - ADIPOQ - APOB - AGT - PF4
	positive regulation of coagulation (GO:0050820)	04/10	<0.001	APOH - F12 - F2 - THBS1
	positive regulation of hemostasis (GO:1900048)	04/10	<0.001	APOH - F12 - F2 - THBS1
	regulation of cholesterol efflux (GO:0010874)	06/33	<0.001	CETP - PON1 - ADIPOQ - APOA1 - APOE - PLTP
	positive regulation of cholesterol transport (GO:0032376)	06/33	<0.001	CETP - PON1 - ADIPOQ - APOA1 - APOE - PLTP
	positive regulation of cellular metabolic process (GO:0031325)	10/105	<0.001	ADIPOQ - APOC1 - APOA2 - PCSK9 - APOA1 - APOA4 - APOE - F2 - THBS1 - AGT
	regulation of smooth muscle cell proliferation (GO:0048660)	07/49	<0.001	IGFBP3 - SERPINF2 - CDH13 - ANG - APOD - IGF1 - THBS1
	negative regulation of cholesterol transport (GO:0032375)	04/11	<0.001	APOC2 - APOC1 - APOA2 - APOC3
	positive regulation of phospholipid transport (GO:2001140)	04/11	<0.001	CETP - APOA1 - APOE - PRAP1
	sterol transport (GO:0015918)	05/21	<0.001	CETP - APOA2 - APOA1 - LCAT - APOB
	inflammatory response (GO:0006954)	15/230	<0.001	CRP - SERPINA3 - ORM1 - HP - HPR - PPBP - LYZ - HSPG2 - THBS1 - CD14 - S100A9 - PF4V1 - CD44 - S100A8 - PF4
	sterol metabolic process (GO:0016125)	08/70	<0.001	CETP - APOA2 - APOF - APOA1 - LCAT - APOA4 - APOE - APOB
	very-low-density lipoprotein particle assembly (GO:0034379)	04/12	<0.001	APOC1 - APOC4 - APOC3 - APOB
	negative regulation of complement activation (GO:0045916)	04/12	<0.001	SERPING1 - C4BPA - C4BPB - A2M
	toll-like receptor signaling pathway (GO:0002224)	09/91	<0.001	FGB - FGA - FGG - LBP - CD14 - APOB - S100A9 - S100A8 - HSP90B1
	positive regulation of cholesterol efflux (GO:0010875)	05/23	<0.001	ADIPOQ - PON1 - APOA1 - APOE - PLTP
	regulation of intestinal lipid absorption (GO:1904729)	03/05	<0.001	APOA1 - APOA4 - PRAP1
	peptidyl-cysteine S-nitrosylation (GO:0018119)	03/05	<0.001	GAPDH - S100A9 - S100A8
	positive regulation of protein secretion (GO:0050714)	08/72	<0.001	FGB - FGA - RBP4 - FGG - ANG - IGF1 - PPIA - TTN
	negative regulation of lipid metabolic process (GO:0045833)	05/24	<0.001	APOC2 - APOC1 - APOA2 - APOC3 - APOD
	positive regulation of lipid transport (GO:0032370)	04/13	<0.001	CETP - ADIPOQ - APOE - PRAP1
	triglyceride metabolic process (GO:0006641)	07/55	<0.001	CETP - APOH - APOC1 - APOA2 - APOC3 - APOE - APOB
	regulation of cellular component biogenesis (GO:0044087)	06/39	<0.001	RAP1B - HSPA8 - HSP90AA1 - APOE - HRG - AGT
	cholesterol metabolic process (GO:0008203)	08/77	<0.001	CETP - APOA2 - APOF - APOA1 - LCAT - APOA4 - APOE - APOB
	negative regulation of receptor-mediated endocytosis (GO:0048261)	05/26	<0.001	APOC2 - ADIPOQ - APOC1 - PCSK9 - APOC3
	acylglycerol metabolic process (GO:0006639)	06/41	<0.001	CETP - APOH - APOC1 - APOA2 - APOC3 - APOE
	cell junction disassembly (GO:0150146)	03/06	<0.001	C1QB - C1QA - C1QC
	positive regulation of plasminogen activation (GO:0010756)	03/06	<0.001	CLEC3B - F12 - ENO1
	regulation of tumor necrosis factor production (GO:0032680)	10/124	<0.001	ORM1 - ADIPOQ - CD14 - IGF1 - LBP - CLU - ORM2 - THBS1 - LTF - PF4
	regulation of protein secretion (GO:0050708)	10/125	<0.001	FGB - FGA - FGG - ITPR1 - SAA1 - ANG - APOE - IGF1 - PPIA - TTN
	positive regulation of heterotypic cell-cell adhesion (GO:0034116)	04/15	<0.001	FGB - FGA - FGG - CD44
	positive regulation of receptor-mediated endocytosis (GO:0048260)	06/44	<0.001	C3 - VTN - TF - PCSK9 - CLU - B2M
	interleukin-12-mediated signaling pathway (GO:0035722)	06/46	<0.001	RAP1B - CA1 - GSTO1 - CFL1 - LCP1 - PPIA
	cellular component disassembly (GO:0022411)	07/66	<0.001	GSN - PLG - LCP1 - A2M - PRSS2 - KLKB1 - CD44
	extracellular matrix disassembly (GO:0022617)	07/66	<0.001	GSN - PLG - LCP1 - A2M - PRSS2 - KLKB1 - CD44
	cellular response to interleukin-12 (GO:0071349)	06/48	<0.001	RAP1B - CA1 - GSTO1 - CFL1 - LCP1 - PPIA
	positive regulation of endocytosis (GO:0045807)	06/48	<0.001	C3 - VTN - TF - APOE - CLU - B2M
	negative regulation of lipid catabolic process (GO:0050995)	04/18	<0.001	APOC1 - APOA2 - APOC3 - GPLD1
	positive regulation of fatty acid metabolic process (GO:0045923)	04/18	<0.001	APOC2 - ADIPOQ - APOA1 - APOA4
	negative regulation of catabolic process (GO:0009895)	06/49	<0.001	CST3 - APOC1 - APOA2 - AGAP2 - FLNA - APOC3
	positive regulation of protein transport (GO:0051222)	07/69	<0.001	FGB - FGA - FGG - ANG - IGF1 - PPIA - TTN
	positive regulation of response to external stimulus (GO:0032103)	10/139	<0.001	APOH - SERPINF2 - PLG - HRG - F2 - S100A9 - THBS1 - OPTN - S100A8 - AGT
	regulation of apoptotic cell clearance (GO:2000425)	03/08	<0.001	C3 - C4A - C2
	regulation of Cdc42 protein signal transduction (GO:0032489)	03/08	<0.001	APOA1 - APOC3 - APOE
	leukocyte aggregation (GO:0070486)	03/08	<0.001	S100A9 - CD44 - S100A8
	positive regulation of apoptotic cell clearance (GO:2000427)	03/08	<0.001	C3 - C4A - C2
	positive regulation of peptide secretion (GO:0002793)	03/08	<0.001	FGB - FGA - FGG
	positive regulation of triglyceride catabolic process (GO:0010898)	03/08	<0.001	APOC2 - APOA1 - APOA4
	positive regulation of cell morphogenesis involved in differentiation (GO:0010770)	06/50	<0.001	FGB - CDKL3 - FGA - FGG - APOA1 - FLNA
	neutrophil chemotaxis (GO:0030593)	07/70	<0.001	SAA1 - PPBP - PPIA - S100A9 - PF4V1 - S100A8 - PF4
	positive regulation of cell-substrate adhesion (GO:0010811)	07/70	<0.001	FGB - FGA - FGG - FN1 - APOA1 - CDH13 - FLNA
	regulation of protein-containing complex assembly (GO:0043254)	09/116	<0.001	CDH5 - HSPA8 - HSP90AA1 - GSN - TFRC - HSPA5 - APOE - HRG - CLU
	regulation of insulin-like growth factor receptor signaling pathway (GO:0043567)	04/19	<0.001	IGFBP4 - IGFBP3 - IGF1 - IGFBP6
	positive regulation of triglyceride metabolic process (GO:0090208)	04/19	<0.001	APOC2 - APOA1 - APOA4 - GPLD1
	regulation of substrate adhesion-dependent cell spreading (GO:1900024)	06/51	<0.001	FGB - FGA - FGG - APOA1 - FLNA - FBLN1
	positive regulation of secretion by cell (GO:1903532)	07/72	<0.001	FGB - FGA - FGG - ANG - IGF1 - PPIA - TTN
	defense response to Gram-negative bacterium (GO:0050829)	07/73	<0.001	FCN2 - LBP - F2 - LYZ - CAMP - OPTN - LTF
	granulocyte chemotaxis (GO:0071621)	07/73	<0.001	SAA1 - PPBP - PPIA - S100A9 - PF4V1 - S100A8 - PF4
	negative regulation of viral life cycle (GO:1903901)	04/20	0.000507983	APCS - FCN3 - GSN - PPIA
	regulation of lipid biosynthetic process (GO:0046890)	05/35	0.000513585	C3 - ADIPOQ - APOA1 - APOA4 - APOE
	positive regulation of lipid biosynthetic process (GO:0046889)	05/35	0.000513585	APOC2 - APOA1 - APOA4 - APOE - GPLD1
	positive regulation of phagocytosis (GO:0050766)	06/53	0.000516378	C3 - C4A - AHSG - APOA2 - APOA1 - C2
	negative regulation of lipase activity (GO:0060192)	03/09	0.000541277	APOC1 - APOA2 - APOC3
	positive regulation of substrate adhesion-dependent cell spreading (GO:1900026)	05/36	0.000587125	FGB - FGA - FGG - FLNA - APOA1
	integrin-mediated signaling pathway (GO:0007229)	07/75	0.000588926	ADAMTS13 - ITGA2B - FN1 - APOA1 - MYH9 - FBLN1 - FERMT3
	phagocytosis, engulfment (GO:0006911)	05/37	0.000668287	IGLL5 - GSN - IGLL1 - MYH9 - THBS1
	neutrophil migration (GO:1990266)	07/77	0.000690587	SAA1 - PPBP - PPIA - S100A9 - PF4V1 - S100A8 - PF4
	positive regulation of tumor necrosis factor production (GO:0032760)	07/77	0.000690587	ORM1 - LBP - CD14 - CLU - ORM2 - THBS1 - PF4
	protein stabilization (GO:0050821)	11/179	0.000707975	HSP90AA1 - LAMP2 - APOA2 - AFM - APOA1 - FLNA - IGF1 - PFN1 - CLU - GAPDH - CPN2
	cellular protein modification process (GO:0006464)	35/1025	0.000731	SERPINA1 - ITIH2 - SERPINC1 - SERPINA10 - PCSK9 - F13A1 - THBS1 - KNG1 - HSP90B1 - C3 - CST3 - C4A - FCGR3A - SPP2 - QSOX1 - APOE - APOB - APOL1 - CDKL3 - FGA - SERPIND1 - AHSG - IGFBP4 - IGFBP3 - FGG - FN1 - APOA2 - APOA1 - CP - YWHAZ - F5 - ERN1 - TF - PROC - ALB
	positive regulation of cellular biosynthetic process (GO:0031328)	11/180	0.000741387	HSP90AA1 - APOC2 - IGF2 - HBB - APOA1 - APOA4 - IGF1 - EEF2 - CLU - THBS1 - GPLD1
	positive regulation of lipid catabolic process (GO:0050996)	04/22	0.000744049	APOC2 - APOA2 - APOA1 - APOA4
	removal of superoxide radicals (GO:0019430)	03/10	0.000762267	PRDX2 - APOA4 - SOD3
	negative regulation of receptor binding (GO:1900121)	03/10	0.000762267	ADIPOQ - PCSK9 - B2M
	positive regulation of NF-kappaB transcription factor activity (GO:0051092)	10/155	0.000844273	CRNN - TFRC - CARD9 - IL1RAP - CLU - PPIA - S100A9 - S100A8 - AGT - LTF
	glycerophospholipid metabolic process (GO:0006650)	07/80	0.000868627	CETP - PON1 - APOA1 - LCAT - APOA4 - PRDX6 - GPLD1
	positive regulation of tumor necrosis factor superfamily cytokine production (GO:1903557)	07/81	0.000935398	ORM1 - LBP - CD14 - CLU - ORM2 - THBS1 - PF4
	positive regulation of wound healing (GO:0090303)	05/40	0.000962436	VTN - APOH - F12 - F2 - THBS1
	cellular response to superoxide (GO:0071451)	03/11	0.00103324	PRDX2 - APOA4 - SOD3
	organophosphate catabolic process (GO:0046434)	03/11	0.00103324	PON1 - APOA2 - ENPP2
	canonical glycolysis (GO:0061621)	04/24	0.00104859	PKM - ENO1 - ALDOA - GAPDH
	glucose catabolic process to pyruvate (GO:0061718)	04/24	0.00104859	PKM - ENO1 - ALDOA - GAPDH
	positive regulation of multicellular organismal process (GO:0051240)	16/345	0.00110496	FGB - FGA - TFRC - MST1 - CARD9 - ADIPOQ - FGG - ENO1 - DBH - AGT - APOC2 - CFL1 - SAA1 - APOE - LBP - GAPDH
	regulation of apoptotic process (GO:0042981)	27/742	0.00119122	TFRC - PCSK9 - CLU - THBS1 - KNG1 - HSP90B1 - COMP - PRDX2 - CFL1 - FLNA - HSP90AA1 - HSPA5 - ACTN1 - IGFBP3 - IGF1 - PRAP1 - YWHAZ - AGT - OBSCN - PROC - ALB - CAT - HRG - PPIA - GPLD1 - CD44 - LTF
	negative regulation of apoptotic process (GO:0043066)	20/485	0.0011966	TFRC - HSPA5 - CSNK2A2 - AGAP2 - IGF1 - PRAP1 - YWHAZ - THBS1 - HSP90B1 - COMP - PRDX2 - PROC - APOH - CFL1 - ALB - CAT - FLNA - APOE - CD44 - LTF
	glucose metabolic process (GO:0006006)	06/62	0.00119664	RBP4 - ADIPOQ - APOD - ENO1 - ALDOA - GAPDH
	glycolytic process through glucose-6-phosphate (GO:0061620)	04/25	0.00122958	PKM - ENO1 - ALDOA - GAPDH
	response to hexose (GO:0009746)	04/25	0.00122958	ADIPOQ - APOA2 - THBS1 - GPLD1
	negative regulation of signaling (GO:0023057)	04/25	0.00122958	IGFBP3 - ADIPOQ - PCSK9 - OPTN
	negative regulation by host of viral process (GO:0044793)	03/12	0.00135812	CRP - APCS - LTF
	regulation of endothelial cell apoptotic process (GO:2000351)	05/44	0.001492	FGB - CDH5 - FGA - FGG - THBS1
	positive regulation of biosynthetic process (GO:0009891)	05/44	0.001492	SERPINF2 - APOA1 - APOA4 - APOE - F2
	cellular response to unfolded protein (GO:0034620)	04/27	0.00165508	ERN1 - HSPA8 - HSPA5 - OPTN
	negative regulation of endothelial cell apoptotic process (GO:2000352)	04/27	0.00165508	FGB - CDH5 - FGA - FGG
	regulation of platelet-derived growth factor receptor signaling pathway (GO:0010640)	03/13	0.00174054	F7 - ADIPOQ - APOD
	negative regulation of macrophage derived foam cell differentiation (GO:0010745)	03/13	0.00174054	CRP - CETP - ADIPOQ
	positive regulation of fatty acid biosynthetic process (GO:0045723)	03/13	0.00174054	APOC2 - APOA1 - APOA4
	positive regulation of smooth muscle cell proliferation (GO:0048661)	05/46	0.00182521	ERN1 - SERPINF2 - CDH13 - IGF1 - THBS1
	mucosal immune response (GO:0002385)	04/28	0.00190199	PIGR - APOA4 - CAMP - LTF
	regulation of peptidyl-tyrosine phosphorylation (GO:0050730)	07/92	0.0019699	VTN - ENPP2 - IGF2 - IGF1 - HRG - CD44 - AGT
	regulation of protein phosphorylation (GO:0001932)	13/266	0.0019965	HSP90AA1 - TFRC - IGFBP3 - ADIPOQ - FN1 - IGF2 - FBLN1 - F2 - TTN - C3 - CDH5 - HRG - PPIA
	negative regulation of response to external stimulus (GO:0032102)	08/118	0.00200659	CDH5 - APCS - PROC - ADIPOQ - SAA1 - APOA1 - APOE - LTF
	regulation of wound healing (GO:0061041)	05/47	0.00201082	APCS - VTN - GP1BA - F2 - HRG
	positive regulation of cell-cell adhesion (GO:0022409)	05/47	0.00201082	FGB - FGA - FGG - SERPINF2 - CD44
	glycolytic process (GO:0006096)	04/29	0.00217327	PKM - ENO1 - ALDOA - GAPDH
	antigen processing and presentation of endogenous peptide antigen (GO:0002483)	03/14	0.00218388	AZGP1 - HLA-A - B2M
	regulation of inflammatory response (GO:0050727)	11/206	0.00219294	CDH5 - PROC - AHSG - TMSB4X - ADIPOQ - SAA1 - APOA1 - APOE - S100A9 - AGT - S100A8
	negative regulation of tumor necrosis factor superfamily cytokine production (GO:1903556)	05/48	0.00220986	ORM1 - ADIPOQ - LBP - IGF1 - LTF
	response to glucose (GO:0009749)	05/49	0.00242286	ERN1 - ADIPOQ - APOA2 - THBS1 - GPLD1
	response to unfolded protein (GO:0006986)	05/49	0.00242286	ERN1 - HSPA8 - HSP90AA1 - HSPA5 - OPTN
	regulation of vasoconstriction (GO:0019229)	04/30	0.0024701	FGB - FGA - FGG - AGT
	plasma membrane invagination (GO:0099024)	04/30	0.0024701	IGLL5 - GSN - IGLL1 - MYH9
	regulation of endothelial cell chemotaxis (GO:2001026)	03/15	0.00269125	TMSB4X - HRG - THBS1
	regulation of macrophage differentiation (GO:0045649)	03/15	0.00269125	ADIPOQ - C1QC - PF4
	negative regulation of inflammatory response (GO:0050728)	11/212	0.00273919	APCS - CDH5 - CD163 - FCGR3A - PROC - ADIPOQ - SAA1 - APOA1 - MYH9 - APOE - IGF1
	negative regulation of cell adhesion (GO:0007162)	06/73	0.00277887	CDH13 - FBLN1 - PLG - TGFBI - HRG - KNG1
	peptide cross-linking (GO:0018149)	04/31	0.00279364	FCGR3A - FN1 - F13A1 - THBS1
	negative regulation of programmed cell death (GO:0043069)	16/381	0.00300909	TFRC - HSPA5 - IGF1 - PRAP1 - YWHAZ - THBS1 - HSP90B1 - COMP - PRDX2 - PROC - CFL1 - ALB - CAT - FLNA - CD44 - LTF
	cellular response to topologically incorrect protein (GO:0035967)	04/32	0.00314502	ERN1 - HSPA8 - HSPA5 - OPTN
	negative regulation of cellular biosynthetic process (GO:0031327)	05/52	0.00315126	FCN3 - ADIPOQ - MST1 - APOC1 - APOC3
	negative regulation of protein metabolic process (GO:0051248)	05/52	0.00315126	APCS - AGAP2 - FLNA - APOE - CLU
	regulation of establishment of cell polarity (GO:2000114)	03/16	0.00326551	RAP1B - CDH5 - GSN
	regulation of interleukin-1 production (GO:0032652)	03/16	0.00326551	ORM1 - SAA1 - ORM2
	epiboly involved in wound healing (GO:0090505)	03/16	0.00326551	FLNA - LCP1 - CD44
	heme catabolic process (GO:0042167)	03/16	0.00326551	AMBP - ALB - BLVRB
	porphyrin-containing compound catabolic process (GO:0006787)	03/16	0.00326551	AMBP - ALB - BLVRB
	positive regulation of vasoconstriction (GO:0045907)	03/16	0.00326551	FGB - FGA - FGG
	negative regulation of smooth muscle cell proliferation (GO:0048662)	04/33	0.00352537	IGFBP3 - ADIPOQ - APOD - ANG
	phosphatidylcholine biosynthetic process (GO:0006656)	04/33	0.00352537	CSNK2A2 - APOA2 - LCAT - APOA1
	chronic inflammatory response (GO:0002544)	02/05	0.00353845	S100A9 - THBS1
	regulation of low-density lipoprotein particle receptor catabolic process (GO:0032803)	02/05	0.00353845	PCSK9 - APOE
	regulation of plasma membrane organization (GO:1903729)	02/05	0.00353845	GSN - MYH9
	regulation of sterol transport (GO:0032371)	02/05	0.00353845	APOC1 - APOA4
	negative regulation of macrophage differentiation (GO:0045650)	02/05	0.00353845	ADIPOQ - C1QC
	negative regulation of plasminogen activation (GO:0010757)	02/05	0.00353845	SERPINF2 - THBS1
	negative regulation of smooth muscle cell apoptotic process (GO:0034392)	02/05	0.00353845	APOH - IGF1
	regulation of megakaryocyte differentiation (GO:0045652)	05/54	0.00371696	ITGA2B - H4-16 - GP1BA - THBS1 - PF4
	proteolysis (GO:0006508)	13/287	0.00383333	CPB2 - F12 - PLG - CNDP1 - CPN1 - F7 - ADAMTS13 - F9 - PROC - PRSS2 - KLKB1 - HABP2 - HGFAC
	negative regulation of blood vessel morphogenesis (GO:2000181)	06/78	0.00387148	SERPINF1 - APOH - HRG - HSPG2 - THBS1 - PF4
	regulation of establishment of endothelial barrier (GO:1903140)	03/17	0.0039093	CDH5 - PROC - VCL
	negative regulation of amyloid-beta formation (GO:1902430)	03/17	0.0039093	IGF1 - APOE - CLU
	negative regulation of viral entry into host cell (GO:0046597)	03/17	0.0039093	APCS - FCN3 - GSN
	pyruvate metabolic process (GO:0006090)	05/55	0.00402552	LDHB - PKM - ENO1 - ALDOA - GAPDH
	regulation of cell adhesion (GO:0030155)	08/133	0.00419953	SAA1 - CDH13 - FBLN1 - TGFBI - HRG - CELSR2 - PRSS2 - KNG1
	bicarbonate transport (GO:0015701)	04/35	0.00437737	CA1 - CA2 - HBB - SLC4A1
	negative regulation of extrinsic apoptotic signaling pathway (GO:2001237)	06/80	0.00438738	FGB - FGA - FGG - IGF1 - THBS1 - PF4
	cytokine-mediated signaling pathway (GO:0019221)	22/621	0.00453505	HSPA8 - HSP90AA1 - GSTO1 - FN1 - F13A1 - HLA-A - PPBP - IL1RAP - YWHAZ - HSP90B1 - RAP1B - CA1 - TMSB4X - CFL1 - SAA1 - LBP - LCP1 - B2M - PPIA - PF4V1 - CD44 - PF4
	positive regulation of macrophage derived foam cell differentiation (GO:0010744)	03/18	0.00462502	APOB - AGT - PF4
	positive regulation of intracellular signal transduction (GO:1902533)	20/546	0.00464243	ECM1 - HSP90AA1 - TFRC - F10 - VWF - CARD9 - ADIPOQ - FN1 - IGF2 - IGF1 - THBS1 - AGT - F7 - FLNA - CDH13 - CD14 - S100A9 - GAPDH - S100A8 - LTF
	regulation of interleukin-8 production (GO:0032677)	06/81	0.00466354	CRP - TMSB4X - ADIPOQ - APOA2 - LBP - CD14
	transition metal ion transport (GO:0000041)	04/36	0.00485115	TF - TFRC - CP - LTF
	negative regulation of hydrolase activity (GO:0051346)	05/58	0.00506065	CST3 - APCS - ECM1 - APOA2 - SERPINA5
	lipid transport (GO:0006869)	07/109	0.00508501	CETP - ABCC4 - APOA1 - APOA4 - APOE - LBP - PLTP
	regulation of blood vessel remodeling (GO:0060312)	02/06	0.00524041	CST3 - HRG
	cellular response to iron ion (GO:0071281)	02/06	0.00524041	TF - B2M
	cellular response to lipoteichoic acid (GO:0071223)	02/06	0.00524041	CD14 - LBP
	response to lipoteichoic acid (GO:0070391)	02/06	0.00524041	CD14 - LBP
	induction of bacterial agglutination (GO:0043152)	02/06	0.00524041	FGB - FGA
	negative regulation of lipoprotein lipase activity (GO:0051005)	02/06	0.00524041	APOC1 - APOC3
	negative regulation of triglyceride metabolic process (GO:0090209)	02/06	0.00524041	APOC3 - GPLD1
	positive regulation of endothelial cell development (GO:1901552)	02/06	0.00524041	CDH5 - PROC
	positive regulation of establishment of endothelial barrier (GO:1903142)	02/06	0.00524041	CDH5 - PROC
	positive regulation of tau-protein kinase activity (GO:1902949)	02/06	0.00524041	HSP90AA1 - CLU
	negative regulation of epithelial cell apoptotic process (GO:1904036)	04/37	0.00535817	FGB - CDH5 - FGA - FGG
	negative regulation of amyloid precursor protein catabolic process (GO:1902992)	03/19	0.00541485	IGF1 - APOE - CLU
	positive regulation of cellular protein catabolic process (GO:1903364)	03/19	0.00541485	HSP90AA1 - PCSK9 - APOE
	protein polymerization (GO:0051258)	05/59	0.00544402	FGB - FGA - GSN - FGG - ANG
	response to reactive oxygen species (GO:0000302)	05/59	0.00544402	CAT - HP - HBB - APOD - APOE
	regulation of cellular component organization (GO:0051128)	08/139	0.00546858	RAP1B - HSPA8 - HSP90AA1 - TFRC - CDH13 - APOE - HRG - AGT
	positive regulation of cytokine production (GO:0001819)	14/335	0.00557201	ORM1 - SERPINF2 - CARD9 - ADIPOQ - APOA2 - HLA-A - ORM2 - AGT - C3 - C5 - SAA1 - CD14 - LBP - GAPDH
	negative regulation of defense response (GO:0031348)	06/85	0.00589731	CDH5 - PROC - ADIPOQ - SAA1 - APOA1 - APOE
	actin-myosin filament sliding (GO:0033275)	04/38	0.00589942	MYL6 - TPM4 - TPM3 - TTN
	muscle filament sliding (GO:0030049)	04/38	0.00589942	MYL6 - TPM4 - TPM3 - TTN
	negative regulation of endothelial cell migration (GO:0010596)	04/38	0.00589942	APOH - APOE - HRG - THBS1
	positive regulation of cellular catabolic process (GO:0031331)	08/141	0.00595071	HSP90AA1 - APOC2 - APOA1 - APOA4 - APOE - IGF1 - GPLD1 - OPTN
	positive regulation of cell migration (GO:0030335)	12/269	0.0060367	F7 - CDH5 - VTN - F10 - HSPA5 - FN1 - ENPP2 - CDH13 - IGF1 - PFN1 - THBS1 - FERMT3
	protein targeting to lysosome (GO:0006622)	03/20	0.00628077	HSPA8 - LAMP2 - CLU
	regulation of acute inflammatory response (GO:0002673)	03/20	0.00628077	APCS - F12 - KLKB1
	regulation of smooth muscle cell migration (GO:0014910)	03/20	0.00628077	VTN - IGFBP3 - IGF1
	positive regulation of hormone secretion (GO:0046887)	03/20	0.00628077	FGB - FGA - FGG
	negative regulation of cellular metabolic process (GO:0031324)	04/39	0.00647588	APCS - PCSK9 - APOE - OPTN
	regulation of ERK1 and ERK2 cascade (GO:0070372)	11/238	0.00650154	FGB - FGA - SERPINF2 - CARD9 - ADIPOQ - FGG - FN1 - FBLN1 - APOE - YWHAZ - CD44
	negative regulation of angiogenesis (GO:0016525)	06/87	0.00659631	SERPINF1 - APOH - HRG - HSPG2 - THBS1 - PF4
	regulation of lipid catabolic process (GO:0050994)	03/21	0.00722456	APOC1 - APOA2 - APOC3
	innate immune response in mucosa (GO:0002227)	03/21	0.00722456	APOA4 - CAMP - LTF
	positive regulation of lipid storage (GO:0010884)	03/21	0.00722456	C3 - APOC4 - APOB
	antigen processing and presentation of endogenous peptide antigen via MHC class I via ER pathway (GO:0002484)	02/07	0.00724375	AZGP1 - HLA-A
	antigen processing and presentation of endogenous peptide antigen via MHC class I via ER pathway, TAP-independent (GO:0002486)	02/07	0.00724375	AZGP1 - HLA-A
	regulation of glycogen (starch) synthase activity (GO:2000465)	02/07	0.00724375	ADIPOQ - IGF2
	regulation of phospholipid transport (GO:2001138)	02/07	0.00724375	CETP - PRAP1
	regulation of systemic arterial blood pressure by renin-angiotensin (GO:0003081)	02/07	0.00724375	SERPINF2 - AGT
	heart trabecula formation (GO:0060347)	02/07	0.00724375	RBP4 - ADGRG6
	iron coordination entity transport (GO:1901678)	02/07	0.00724375	HRG - LTF
	negative regulation of low-density lipoprotein receptor activity (GO:1905598)	02/07	0.00724375	ADIPOQ - PCSK9
	positive regulation of receptor catabolic process (GO:2000646)	02/07	0.00724375	PCSK9 - APOE
	positive regulation of respiratory burst (GO:0060267)	02/07	0.00724375	LBP - JCHAIN
	lipid homeostasis (GO:0055088)	05/64	0.00767246	CETP - PNPLA8 - APOA1 - APOA4 - APOE
	carbohydrate catabolic process (GO:0016052)	04/41	0.00773815	PKM - ENO1 - ALDOA - GAPDH
	gluconeogenesis (GO:0006094)	04/41	0.00773815	RBP4 - ENO1 - ALDOA - GAPDH
	positive regulation of transport (GO:0051050)	06/91	0.00817166	AHSG - PON1 - APOA2 - APOA1 - APOE - GPLD1
	chaperone-mediated protein complex assembly (GO:0051131)	03/22	0.0082478	APCS - HSP90AA1 - CLU
	regulation of lipid storage (GO:0010883)	03/22	0.0082478	CRP - C3 - APOB
	regulation of macrophage chemotaxis (GO:0010758)	03/22	0.0082478	C5 - MST1 - THBS1
	regulation of platelet activation (GO:0010543)	03/22	0.0082478	APOE - F2 - HRG
	regulation of extrinsic apoptotic signaling pathway via death domain receptors (GO:1902041)	04/42	0.00842576	FGB - FGA - FGG - THBS1
	negative regulation of multicellular organismal process (GO:0051241)	10/214	0.00859876	PROCR - APOM - PROC - ADIPOQ - PON1 - APOA2 - APOA1 - APOC3 - APOA4 - VASN
	regulation of endothelial cell proliferation (GO:0001936)	06/92	0.00860435	ECM1 - APOH - CDH13 - ANG - APOE - THBS1
	positive regulation of cell death (GO:0010942)	05/66	0.00871899	C1QA - HP - HBB - HPR - CLU
	negative regulation of proteolysis (GO:0045861)	04/43	0.00915217	CST3 - ECM1 - F2 - KNG1
	positive regulation of peptide hormone secretion (GO:0090277)	04/43	0.00915217	FGB - FGA - RBP4 - FGG
	actin filament organization (GO:0007015)	08/152	0.00920281	GSN - TPM4 - TPM3 - ACTN1 - FLNA - LCP1 - ALDOA - TTN
	blood vessel endothelial cell migration (GO:0043534)	03/23	0.0093519	CDH5 - MYH9 - GPLD1
	antigen processing and presentation of endogenous peptide antigen via MHC class I (GO:0019885)	02/08	0.00953633	HLA-A - B2M
	antigen processing and presentation of exogenous peptide antigen via MHC class I, TAP-independent (GO:0002480)	02/08	0.00953633	HLA-A - B2M
	aromatic compound catabolic process (GO:0019439)	02/08	0.00953633	PON3 - PON1
	regulation of intestinal cholesterol absorption (GO:0030300)	02/08	0.00953633	APOA1 - APOA4
	elastic fiber assembly (GO:0048251)	02/08	0.00953633	TNXB - FBLN5
	regulation of positive chemotaxis (GO:0050926)	02/08	0.00953633	F7 - CDH13
	response to hydroperoxide (GO:0033194)	02/08	0.00953633	GPX3 - APOA4
	integrin activation (GO:0033622)	02/08	0.00953633	FN1 - FERMT3
	negative regulation of complement activation, classical pathway (GO:0045959)	02/08	0.00953633	C4BPA - C4BPB
	negative regulation of muscle cell apoptotic process (GO:0010656)	02/08	0.00953633	APOH - IGF1
	endoplasmic reticulum to Golgi vesicle-mediated transport (GO:0006888)	09/185	0.00966818	F7 - PROC - SERPINA1 - F9 - F10 - PROS1 - PROZ - F2 - F5
	regulation of myeloid cell differentiation (GO:0045637)	05/68	0.00986025	ITGA2B - H4-16 - GP1BA - THBS1 - PF4
	hexose biosynthetic process (GO:0019319)	04/44	0.00991819	RBP4 - ENO1 - ALDOA - GAPDH
	negative regulation of cellular catabolic process (GO:0031330)	05/69	0.0104676	CST3 - APOC1 - HP - APOC3 - GPLD1
	extracellular matrix assembly (GO:0085029)	03/24	0.0105381	TNXB - QSOX1 - FBLN5
	wound healing, spreading of cells (GO:0044319)	03/24	0.0105381	FLNA - LCP1 - CD44
	phospholipid catabolic process (GO:0009395)	03/24	0.0105381	APOA2 - ENPP2 - PRDX6
	positive regulation of chemotaxis (GO:0050921)	04/45	0.0107246	F7 - TMSB4X - CDH13 - THBS1
	negative regulation of tumor necrosis factor production (GO:0032720)	04/46	0.0115722	ORM1 - ADIPOQ - LBP - IGF1
	response to metal ion (GO:0010038)	05/71	0.0117581	FGB - FGA - FGG - THBS1 - TTN
	negative regulation of actin filament polymerization (GO:0030837)	03/25	0.0118074	GSN - TMSB4X - PFN1
	negative regulation of endocytosis (GO:0045806)	03/25	0.0118074	APOC2 - APOC1 - APOC3
	ATF6-mediated unfolded protein response (GO:0036500)	02/09	0.0121064	HSPA5 - HSP90B1
	regulation of complement activation, classical pathway (GO:0030450)	02/09	0.0121064	C4BPA - C4BPB
	regulation of smooth muscle cell apoptotic process (GO:0034391)	02/09	0.0121064	APOH - IGF1
	response to misfolded protein (GO:0051788)	02/09	0.0121064	F12 - CLU
	negative regulation of production of molecular mediator of immune response (GO:0002701)	02/09	0.0121064	APOA2 - APOA1
	organic acid catabolic process (GO:0016054)	02/09	0.0121064	PON3 - PON1
	peptidyl-cysteine modification (GO:0018198)	02/09	0.0121064	S100A9 - S100A8
	positive regulation of ATP biosynthetic process (GO:2001171)	02/09	0.0121064	TMSB4X - ENO1
	muscle contraction (GO:0006936)	07/129	0.0123548	MYL6 - TPM4 - TPM3 - TLN1 - ALDOA - VCL - TTN
	negative regulation of supramolecular fiber organization (GO:1902904)	05/72	0.0124422	CDH5 - HSPA8 - APOE - PFN1 - CLU
	positive regulation of protein phosphorylation (GO:0001934)	14/371	0.0129559	HSP90AA1 - TFRC - ADIPOQ - AGAP2 - IGF2 - IGF1 - F2 - INHBC - AGT - C3 - VTN - ENPP2 - PPIA - CD44
	cellular response to drug (GO:0035690)	03/26	0.0131609	TFRC - ADIPOQ - GPLD1
	negative regulation of cell development (GO:0010721)	03/26	0.0131609	IGF1 - B2M - LTF
	cellular response to chemical stress (GO:0062197)	06/101	0.013264	PRDX2 - GPX3 - CAT - PPIA - PRDX6 - SOD3
	negative regulation of protein binding (GO:0032091)	05/74	0.0138902	CFHR2 - CFHR1 - ADIPOQ - CFHR5 - B2M
	adherens junction organization (GO:0034332)	04/49	0.0143688	CDH5 - CDH13 - ANG - VCL
	positive regulation of reactive oxygen species metabolic process (GO:2000379)	04/49	0.0143688	CRP - F2 - THBS1 - AGT
	mitotic chromosome condensation (GO:0007076)	03/27	0.0145991	CSNK2A2 - H4-16 - TTN
	positive regulation of nitric oxide biosynthetic process (GO:0045429)	03/27	0.0145991	HSP90AA1 - HBB - CLU
	regulation of cell-cell adhesion involved in gastrulation (GO:0070587)	02/10	0.0149424	ADIPOQ - APOA1
	regulation of endoplasmic reticulum unfolded protein response (GO:1900101)	02/10	0.0149424	ERN1 - HSPA5
	regulation of granulocyte differentiation (GO:0030852)	02/10	0.0149424	ADIPOQ - C1QC
	regulation of low-density lipoprotein particle clearance (GO:0010988)	02/10	0.0149424	APOC3 - PCSK9
	regulation of podosome assembly (GO:0071801)	02/10	0.0149424	GSN - LCP1
	regulation of receptor binding (GO:1900120)	02/10	0.0149424	ADIPOQ - B2M
	regulation of tau-protein kinase activity (GO:1902947)	02/10	0.0149424	HSP90AA1 - CLU
	sequestering of actin monomers (GO:0042989)	02/10	0.0149424	GSN - TMSB4X
	modulation by symbiont of host process (GO:0044003)	02/10	0.0149424	ENO1 - B2M
	negative regulation of heterotypic cell-cell adhesion (GO:0034115)	02/10	0.0149424	ADIPOQ - APOA1
	negative regulation of humoral immune response mediated by circulating immunoglobulin (GO:0002924)	02/10	0.0149424	C4BPA - C4BPB
	neuron remodeling (GO:0016322)	02/10	0.0149424	C3 - C1QA
	peptidyl-amino acid modification (GO:0018193)	02/10	0.0149424	APOA2 - APOA1
	phosphatidylcholine catabolic process (GO:0034638)	02/10	0.0149424	PNPLA8 - ENPP2
	positive regulation of toll-like receptor 4 signaling pathway (GO:0034145)	02/10	0.0149424	LBP - LTF
	iron ion transport (GO:0006826)	04/50	0.0153877	TF - TFRC - CP - LTF
	regulation of protein transport (GO:0051223)	03/28	0.0161227	HSPA8 - SAA1 - LCP1
	glycerophospholipid catabolic process (GO:0046475)	03/28	0.0161227	PNPLA8 - ENPP2 - PRDX6
	positive regulation of fibroblast proliferation (GO:0048146)	03/28	0.0161227	FN1 - IGF1 - AGT
	positive regulation of nitric oxide metabolic process (GO:1904407)	03/28	0.0161227	HSP90AA1 - HBB - CLU
	protein localization to cell surface (GO:0034394)	03/28	0.0161227	FLNA - FBLN5 - VCL
	organic substance transport (GO:0071702)	07/136	0.0161231	CETP - APOA1 - MYH9 - APOA4 - HRG - PLTP - HSP90B1
	response to calcium ion (GO:0051592)	06/107	0.0172079	FGB - FGA - FGG - THBS1 - GPLD1 - TTN
	transition metal ion homeostasis (GO:0055076)	03/29	0.0177323	TF - B2M - CP
	negative regulation of myeloid leukocyte differentiation (GO:0002762)	03/29	0.0177323	APCS - ADIPOQ - C1QC
	actin filament depolymerization (GO:0030042)	02/11	0.0180333	GSN - CFL1
	actin filament network formation (GO:0051639)	02/11	0.0180333	ACTN1 - LCP1
	protein oxidation (GO:0018158)	02/11	0.0180333	APOA2 - APOA1
	regulation of lamellipodium morphogenesis (GO:2000392)	02/11	0.0180333	ENPP2 - CD44
	regulation of monocyte chemotactic protein-1 production (GO:0071637)	02/11	0.0180333	ADIPOQ - APOD
	negative regulation of platelet-derived growth factor receptor signaling pathway (GO:0010642)	02/11	0.0180333	ADIPOQ - APOD
	positive regulation by host of viral process (GO:0044794)	02/11	0.0180333	CFL1 - APOE
	positive regulation of lipid localization (GO:1905954)	02/11	0.0180333	C3 - APOB
	positive regulation of transforming growth factor beta production (GO:0071636)	02/11	0.0180333	SERPINF2 - THBS1
	regulation of focal adhesion assembly (GO:0051893)	04/54	0.0199129	APOD - HRG - THBS1 - VCL
	cell-cell junction organization (GO:0045216)	05/82	0.0208056	CDH5 - CDH13 - ANG - DSG2 - TLN1
	positive regulation of DNA-binding transcription factor activity (GO:0051091)	10/246	0.0209607	CRNN - TFRC - CARD9 - IL1RAP - CLU - PPIA - S100A9 - AGT - S100A8 - LTF
	regulation of blood vessel endothelial cell migration (GO:0043535)	04/55	0.021159	TMSB4X - APOE - HRG - THBS1
	activation of protein kinase B activity (GO:0032148)	03/31	0.0212104	ANG - IGF1 - PPIA
	vitamin transport (GO:0051180)	03/31	0.0212104	AFM - APOA1 - GC
	actin crosslink formation (GO:0051764)	02/12	0.0213684	FLNA - LCP1
	carboxylic acid catabolic process (GO:0046395)	02/12	0.0213684	PON3 - PON1
	gas transport (GO:0015669)	02/12	0.0213684	CA2 - HBB
	keratan sulfate catabolic process (GO:0042340)	02/12	0.0213684	LUM - OMD
	negative regulation of amyloid fibril formation (GO:1905907)	02/12	0.0213684	APOE - CLU
	negative regulation of fatty acid biosynthetic process (GO:0045717)	02/12	0.0213684	APOC1 - APOC3
	peptidyl-methionine modification (GO:0018206)	02/12	0.0213684	APOA2 - APOA1
	phospholipid homeostasis (GO:0055091)	02/12	0.0213684	CETP - APOA1
	glycosaminoglycan catabolic process (GO:0006027)	04/56	0.0224519	LUM - OMD - HSPG2 - CD44
	negative regulation of metabolic process (GO:0009892)	04/56	0.0224519	APOC2 - ADIPOQ - APOC1 - APOC3
	response to lipid (GO:0033993)	06/114	0.0227483	RBP4 - GPX3 - APOA4 - LBP - S100A9 - S100A8
	superoxide metabolic process (GO:0006801)	03/32	0.0230792	PRDX2 - APOA4 - SOD3
	positive regulation of glucose transmembrane transport (GO:0010828)	03/32	0.0230792	C3 - ADIPOQ - IGF1
	positive regulation of protein metabolic process (GO:0051247)	06/115	0.0236269	CARD9 - C4BPA - C4BPB - APOE - CLU - AGT
	positive regulation of protein catabolic process (GO:0045732)	05/85	0.0238882	HSP90AA1 - C4BPA - C4BPB - APOE - GPLD1
	positive regulation of gene expression (GO:0010628)	16/482	0.0246126	CRP - GSN - TFRC - CARD9 - FN1 - IGF1 - EEF2 - CLU - THBS1 - AGT - TTN - ERN1 - CDH5 - SAA1 - GAPDH - PF4
	negative regulation of cytokine production (GO:0001818)	08/182	0.0246385	ORM1 - TMSB4X - FN1 - APOA2 - APOA1 - APOD - F2 - THBS1
	positive regulation of phosphorylation (GO:0042327)	10/253	0.0248501	C3 - HSP90AA1 - TFRC - ADIPOQ - IGF2 - ANG - IGF1 - F2 - PPIA - THBS1
	response to iron ion (GO:0010039)	02/13	0.0249371	TF - B2M
	icosanoid secretion (GO:0032309)	02/13	0.0249371	ABCC4 - PNPLA8
	negative regulation of gluconeogenesis (GO:0045721)	02/13	0.0249371	ADIPOQ - MST1
	negative regulation of macromolecule biosynthetic process (GO:0010558)	02/13	0.0249371	FCN3 - PF4
	positive regulation of purine nucleotide biosynthetic process (GO:1900373)	02/13	0.0249371	TMSB4X - ENO1
	positive regulation of transporter activity (GO:0032411)	02/13	0.0249371	ADIPOQ - PON1
	apoptotic cell clearance (GO:0043277)	03/33	0.0250346	FCN2 - FCN3 - THBS1
	positive regulation of ATP metabolic process (GO:1903580)	03/33	0.0250346	TMSB4X - ENO1 - IGF1
	regulation of phagocytosis (GO:0050764)	04/58	0.0251794	AHSG - ADIPOQ - APOA2 - APOA1
	positive regulation of protein-containing complex assembly (GO:0031334)	06/118	0.0263986	RAP1B - CDH5 - HSP90AA1 - TFRC - LCP1 - CLU
	regulation of amyloid-beta formation (GO:1902003)	03/34	0.0270764	APOE - IGF1 - CLU
	negative regulation of blood vessel endothelial cell migration (GO:0043537)	03/34	0.0270764	APOE - HRG - THBS1
	negative regulation of extrinsic apoptotic signaling pathway via death domain receptors (GO:1902042)	03/34	0.0270764	FGB - FGA - FGG
	negative regulation of mitochondrion organization (GO:0010823)	03/34	0.0270764	TFRC - IGF1 - CLU
	regulation of endothelial cell migration (GO:0010594)	05/89	0.0284353	APOH - APOE - THBS1 - GPLD1 - AGT
	regulation of cAMP-dependent protein kinase activity (GO:2000479)	02/14	0.0287293	ADIPOQ - MST1
	detection of bacterium (GO:0016045)	02/14	0.0287293	PGLYRP2 - HLA-A
	renal absorption (GO:0070293)	02/14	0.0287293	GSN - HBB
	negative regulation of bone mineralization (GO:0030502)	02/14	0.0287293	ECM1 - AHSG
	negative regulation of cell activation (GO:0050866)	02/14	0.0287293	APOE - F2
	negative regulation of smooth muscle cell migration (GO:0014912)	02/14	0.0287293	IGFBP3 - ADIPOQ
	positive regulation of glycogen biosynthetic process (GO:0045725)	02/14	0.0287293	IGF2 - IGF1
	positive regulation of transmembrane transport (GO:0034764)	02/14	0.0287293	C3 - CA2
	blood vessel diameter maintenance (GO:0097746)	03/35	0.0292044	CRP - SERPINF2 - AGT
	negative regulation of epithelial cell migration (GO:0010633)	03/35	0.0292044	APOH - APOE - THBS1
	iron ion homeostasis (GO:0055072)	04/61	0.0296297	TF - TFRC - B2M - CP
	negative regulation of response to stimulus (GO:0048585)	04/61	0.0296297	AMBP - IGFBP3 - APOA1 - CLU
	positive regulation of interleukin-8 production (GO:0032757)	04/61	0.0296297	ADIPOQ - APOA2 - LBP - CD14
	positive regulation of binding (GO:0051099)	05/90	0.0296518	VTN - PON1 - APOE - IGF1 - B2M
	calcium-dependent cell-cell adhesion via plasma membrane cell adhesion molecules (GO:0016339)	03/36	0.0314184	CDH5 - SELL - CDH13
	macrophage activation (GO:0042116)	03/36	0.0314184	C1QA - LBP - CLU
	positive regulation of T cell mediated immunity (GO:0002711)	03/36	0.0314184	AZGP1 - HLA-A - B2M
	positive regulation of epithelial cell proliferation (GO:0050679)	06/123	0.0314824	CRNN - ECM1 - MST1 - CDH13 - ANG - IGF1
	regulation of amyloid fibril formation (GO:1905906)	02/15	0.0327351	APOE - CLU
	regulation of triglyceride biosynthetic process (GO:0010866)	02/15	0.0327351	C3 - GPLD1
	response to muscle stretch (GO:0035994)	02/15	0.0327351	GSN - TTN
	lipoxygenase pathway (GO:0019372)	02/15	0.0327351	PON3 - PON1
	negative regulation of cellular component movement (GO:0051271)	02/15	0.0327351	ACTN1 - FBLN1
	negative regulation of protein processing (GO:0010955)	02/15	0.0327351	SERPINF2 - THBS1
	positive regulation of glycogen metabolic process (GO:0070875)	02/15	0.0327351	IGF2 - IGF1
	positive regulation of membrane protein ectodomain proteolysis (GO:0051044)	02/15	0.0327351	APOE - GPLD1
	prostanoid biosynthetic process (GO:0046457)	02/15	0.0327351	PNPLA8 - PTGDS
	protein kinase A signaling (GO:0010737)	02/15	0.0327351	LCP1 - TTN
	skeletal system development (GO:0001501)	07/158	0.0331423	COMP - RBP4 - AHSG - IGF2 - SPP2 - IGF1 - CD44
	cellular response to oxidative stress (GO:0034599)	06/125	0.0336827	PRDX2 - GPX3 - CAT - PPIA - PRDX6 - SOD3
	regulation of vascular associated smooth muscle cell proliferation (GO:1904705)	03/37	0.0337178	ERN1 - ADIPOQ - IGF1
	negative regulation of endothelial cell proliferation (GO:0001937)	03/37	0.0337178	APOH - APOE - THBS1
	positive regulation of exocytosis (GO:0045921)	03/37	0.0337178	FGB - FGA - FGG
	response to lipopolysaccharide (GO:0032496)	07/159	0.034122	CD14 - PPBP - LBP - S100A9 - S100A8 - PF4V1 - PF4
	protein-containing complex assembly (GO:0065003)	10/267	0.0341405	FGB - FGA - SERPINA1 - FGG - FN1 - APOA4 - IL1RAP - FERMT3 - JCHAIN - F5
	protein catabolic process (GO:0030163)	04/64	0.0345166	HSPA8 - HSP90AA1 - LAMP2 - APOE
	negative regulation of cellular protein metabolic process (GO:0032269)	05/94	0.0348433	CST3 - APOE - F2 - GAPDH - KNG1
	negative regulation of MAPK cascade (GO:0043409)	05/94	0.0348433	ADIPOQ - FBLN1 - APOE - PPIA - AGT
	positive regulation of epithelial cell migration (GO:0010634)	05/94	0.0348433	ENPP2 - PFN1 - THBS1 - GPLD1 - AGT
	chemical homeostasis (GO:0048878)	04/65	0.0362434	CETP - PNPLA8 - SLC4A1 - APOA4
	regulation of amyloid-beta clearance (GO:1900221)	02/16	0.0369451	APOE - CLU
	regulation of ATP biosynthetic process (GO:2001169)	02/16	0.0369451	TMSB4X - ENO1
	negative regulation of cell-substrate junction organization (GO:0150118)	02/16	0.0369451	APOD - THBS1
	negative regulation of focal adhesion assembly (GO:0051895)	02/16	0.0369451	APOD - THBS1
	negative regulation of platelet activation (GO:0010544)	02/16	0.0369451	APOE - F2
	negative regulation of release of cytochrome c from mitochondria (GO:0090201)	02/16	0.0369451	IGF1 - CLU
	positive regulation of collagen biosynthetic process (GO:0032967)	02/16	0.0369451	SERPINF2 - F2
	positive regulation of small molecule metabolic process (GO:0062013)	02/16	0.0369451	ADIPOQ - GPLD1
	cellular response to nutrient levels (GO:0031669)	04/66	0.0380191	HSPA8 - LAMP2 - ALB - PCSK9
	endothelial cell migration (GO:0043542)	03/39	0.0385711	CDH5 - CDH13 - MYH9
	regulation of viral entry into host cell (GO:0046596)	03/39	0.0385711	APCS - FCN3 - GSN
	carboxylic acid metabolic process (GO:0019752)	03/40	0.0411238	PON3 - GSTO1 - PON1
	regulation of nitric oxide biosynthetic process (GO:0045428)	03/40	0.0411238	HSP90AA1 - HBB - CLU
	negative regulation of cell-substrate adhesion (GO:0010812)	03/40	0.0411238	FBLN1 - PLG - THBS1
	regulation of receptor recycling (GO:0001919)	02/17	0.0413499	PCSK9 - OPTN
	negative regulation of cytokine production involved in immune response (GO:0002719)	02/17	0.0413499	APOA2 - APOA1
	negative regulation of fatty acid metabolic process (GO:0045922)	02/17	0.0413499	APOC1 - APOC3
	positive regulation of collagen metabolic process (GO:0010714)	02/17	0.0413499	SERPINF2 - F2
	positive regulation of macrophage activation (GO:0043032)	02/17	0.0413499	LBP - THBS1
	positive regulation of muscle hypertrophy (GO:0014742)	02/17	0.0413499	IGF1 - AGT
	positive regulation of positive chemotaxis (GO:0050927)	02/17	0.0413499	F7 - CDH13
	positive regulation of smooth muscle cell migration (GO:0014911)	02/17	0.0413499	VTN - IGF1
	protein autoprocessing (GO:0016540)	02/17	0.0413499	F12 - PCSK9
	organic anion transport (GO:0015711)	05/99	0.0420776	ABCC4 - CA1 - CA2 - HBB - SLC4A1
	regulation of angiogenesis (GO:0045765)	08/203	0.042767	CDH5 - ECM1 - SERPINF1 - APOH - HRG - HSPG2 - THBS1 - PF4
	regulation of protein dephosphorylation (GO:0035304)	03/41	0.0437595	CDH5 - PPIA - HSP90B1
	hexose metabolic process (GO:0019318)	03/41	0.0437595	ADIPOQ - APOD - ALDOA
	visual system development (GO:0150063)	03/41	0.0437595	C3 - C1QA - RBP4
	negative regulation of cell-cell adhesion (GO:0022408)	03/41	0.0437595	ADIPOQ - APOA1 - PLG
	positive regulation of peptidyl-tyrosine phosphorylation (GO:0050731)	06/134	0.0448025	VTN - ENPP2 - IGF2 - IGF1 - CD44 - AGT
	negative regulation of viral process (GO:0048525)	04/70	0.0456133	APCS - PPIA - MBL2 - LTF
	carbohydrate derivative transport (GO:1901264)	02/18	0.0459405	LBP - PLTP
	regulation of establishment or maintenance of cell polarity (GO:0032878)	02/18	0.0459405	RAP1B - CDH5
	epithelial structure maintenance (GO:0010669)	02/18	0.0459405	SERPINA3 - RBP4
	regulation of transforming growth factor beta production (GO:0071634)	02/18	0.0459405	SERPINF2 - FN1
	maintenance of gastrointestinal epithelium (GO:0030277)	02/18	0.0459405	SERPINA3 - RBP4
	negative regulation of tumor necrosis factor-mediated signaling pathway (GO:0010804)	02/18	0.0459405	ADIPOQ - APOA1
	neuron maturation (GO:0042551)	02/18	0.0459405	C3 - C1QA
	nitric oxide mediated signal transduction (GO:0007263)	02/18	0.0459405	APOE - AGT
	positive regulation of cardiac muscle hypertrophy (GO:0010613)	02/18	0.0459405	IGF1 - AGT
	negative regulation of protein catabolic process (GO:0042177)	03/42	0.0464774	CST3 - AGAP2 - FLNA
	regulation of protein catabolic process (GO:0042176)	05/102	0.0468216	EEF1A1 - AGAP2 - FLNA - C4BPA - C4BPB
	positive regulation of I-kappaB kinase&&NF-kappaB signaling (GO:0043123)	07/171	0.0473979	ECM1 - TFRC - ADIPOQ - CARD9 - FLNA - GAPDH - LTF
	positive regulation of ERK1 and ERK2 cascade (GO:0070374)	07/172	0.0486338	FGB - FGA - SERPINF2 - FGG - CARD9 - APOE - CD44
	regulation of cytokine production involved in inflammatory response (GO:1900015)	03/43	0.0492768	CARD9 - APOD - F2
	cell morphogenesis involved in differentiation (GO:0000904)	04/72	0.0497046	ATRN - ACTN1 - FN1 - FERMT3
	negative regulation of epithelial cell proliferation (GO:0050680)	04/72	0.0497046	APOH - APOE - B2M - THBS1
	regulation of cell-cell adhesion mediated by cadherin (GO:2000047)	02/19	0.0507082	SERPINF2 - PLG
	regulation of collagen biosynthetic process (GO:0032965)	02/19	0.0507082	SERPINF2 - F2
	regulation of leukocyte chemotaxis (GO:0002688)	02/19	0.0507082	F7 - MST1
	regulation of T cell cytokine production (GO:0002724)	02/19	0.0507082	HLA-A - B2M
	heart trabecula morphogenesis (GO:0061384)	02/19	0.0507082	RBP4 - ADGRG6
	negative regulation of cytokine production involved in inflammatory response (GO:1900016)	02/19	0.0507082	APOD - F2
	positive regulation of G protein-coupled receptor signaling pathway (GO:0045745)	02/19	0.0507082	C3 - F2
	positive regulation of leukocyte activation (GO:0002696)	02/19	0.0507082	LBP - THBS1
	prostaglandin biosynthetic process (GO:0001516)	02/19	0.0507082	PNPLA8 - PTGDS
	response to molecule of bacterial origin (GO:0002237)	04/73	0.0518235	LBP - CD14 - S100A9 - S100A8
	regulation of cell migration (GO:0030334)	13/408	0.0524784	F10 - HSPA5 - ADIPOQ - IGF1 - THBS1 - F7 - CDH5 - TMSB4X - ENPP2 - FLNA - CDH13 - VCL - FERMT3
	regulation of peptide hormone secretion (GO:0090276)	04/74	0.0539912	FGB - FGA - FGG - ITPR1
	positive regulation of signal transduction (GO:0009967)	09/252	0.0550827	C3 - ERN1 - F7 - VTN - VWF - ADIPOQ - IGF2 - FLNA - IGF1
	positive regulation of protein modification process (GO:0031401)	08/214	0.0550846	C3 - CDH5 - HSP90AA1 - TFRC - ADIPOQ - IGF2 - F2 - PPIA
	chromosome condensation (GO:0030261)	03/45	0.0551162	CSNK2A2 - H4-16 - TTN
	lipopolysaccharide-mediated signaling pathway (GO:0031663)	02/20	0.0556446	CD14 - LBP
	toll-like receptor 4 signaling pathway (GO:0034142)	02/20	0.0556446	CD14 - LBP
	positive regulation of activated T cell proliferation (GO:0042104)	02/20	0.0556446	IGF2 - IGF1
	regulation of fibroblast proliferation (GO:0048145)	03/46	0.0581542	FN1 - IGF1 - AGT
	negative regulation of cell communication (GO:0010648)	02/21	0.0607414	IGFBP3 - ADIPOQ
	positive regulation of T cell cytokine production (GO:0002726)	02/21	0.0607414	HLA-A - B2M
	positive regulation of vascular associated smooth muscle cell proliferation (GO:1904707)	02/21	0.0607414	ERN1 - IGF1
	positive regulation of endothelial cell proliferation (GO:0001938)	04/77	0.0607843	ECM1 - IGF2 - CDH13 - ANG
	response to endoplasmic reticulum stress (GO:0034976)	05/110	0.0609655	ERN1 - HSPA5 - ITPR1 - THBS1 - HSP90B1
	positive regulation of neuron death (GO:1901216)	03/47	0.0612696	C1QA - PCSK9 - CLU
	negative regulation of cell population proliferation (GO:0008285)	12/379	0.0631195	AZGP1 - RBP4 - IGFBP3 - CDH13 - APOD - FBLN1 - ANG - PLG - IGFBP6 - HRG - B2M - GPLD1
	negative regulation of apoptotic signaling pathway (GO:2001234)	04/78	0.0631447	CSNK2A2 - IGF1 - CLU - THBS1
	positive regulation of cell motility (GO:2000147)	08/221	0.0639926	F7 - CDH5 - F10 - HSPA5 - CDH13 - IGF1 - THBS1 - FERMT3
	substrate adhesion-dependent cell spreading (GO:0034446)	03/48	0.0644613	ATRN - FN1 - FERMT3
	negative regulation of MAP kinase activity (GO:0043407)	03/48	0.0644613	ADIPOQ - APOE - AGT
	regulation of membrane protein ectodomain proteolysis (GO:0051043)	02/22	0.0659908	APOE - GPLD1
	microglial cell activation (GO:0001774)	02/22	0.0659908	C1QA - CLU
	negative regulation of biomineral tissue development (GO:0070168)	02/22	0.0659908	ECM1 - AHSG
	negative regulation of lipid biosynthetic process (GO:0051055)	02/22	0.0659908	APOC1 - APOC3
	negative regulation of myeloid cell differentiation (GO:0045638)	02/22	0.0659908	H4-16 - PF4
	negative regulation of small molecule metabolic process (GO:0062014)	02/22	0.0659908	ADIPOQ - MST1
	regulation of cellular protein metabolic process (GO:0032268)	03/49	0.0677282	APOE - CNDP1 - AGT
	cellular defense response (GO:0006968)	03/49	0.0677282	LGALS3BP - CD5L - LBP
	response to hydrogen peroxide (GO:0042542)	03/49	0.0677282	CAT - HP - HBB
	regulation of I-kappaB kinase&&NF-kappaB signaling (GO:0043122)	08/224	0.0680694	ECM1 - TFRC - CARD9 - ADIPOQ - FLNA - GAPDH - OPTN - LTF
	positive regulation of cellular component organization (GO:0051130)	05/114	0.0688513	CDH5 - TFRC - APOC2 - APOE - CLU
	regulation of cytokine production (GO:0001817)	06/150	0.0696624	CRP - CARD9 - SAA1 - GAPDH - AGT - LTF
	cellular response to molecule of bacterial origin (GO:0071219)	05/115	0.070907	CD14 - PPBP - LBP - PF4V1 - PF4
	actin polymerization or depolymerization (GO:0008154)	03/50	0.0710691	GSN - CFL1 - ANG
	diacylglycerol metabolic process (GO:0046339)	02/23	0.071385	APOA2 - ANG
	regulation of peptidase activity (GO:0052547)	02/23	0.071385	CST3 - ECM1
	ERK1 and ERK2 cascade (GO:0070371)	02/23	0.071385	APOA1 - IGF1
	regulation of supramolecular fiber organization (GO:1902903)	02/23	0.071385	HSPA8 - APOE
	regulation of toll-like receptor 4 signaling pathway (GO:0034143)	02/23	0.071385	LBP - LTF
	negative regulation of intracellular protein transport (GO:0090317)	02/23	0.071385	ADIPOQ - APOD
	positive regulation of epithelial cell apoptotic process (GO:1904037)	02/23	0.071385	GSN - THBS1
	negative regulation of signal transduction (GO:0009968)	09/267	0.0733529	AHSG - IGFBP3 - CSNK2A2 - ADIPOQ - APOD - HRG - THBS1 - AGT - LTF
	blood circulation (GO:0008015)	03/51	0.0744827	SERPING1 - LPA - F5
	regulation of protein modification process (GO:0031399)	03/51	0.0744827	CDH5 - FN1 - IGF2
	positive regulation of actin filament bundle assembly (GO:0032233)	03/51	0.0744827	SERPINF2 - APOA1 - PFN1
	regulation of interleukin-1 beta production (GO:0032651)	04/83	0.0756545	ORM1 - APOA1 - IGF1 - ORM2
	regulation of cardiac muscle hypertrophy (GO:0010611)	02/24	0.0769165	IGF1 - AGT
	regulation of cytokine production involved in immune response (GO:0002718)	02/24	0.0769165	APOA2 - APOA1
	negative regulation of ossification (GO:0030279)	02/24	0.0769165	ECM1 - AHSG
	regulation of protein binding (GO:0043393)	05/118	0.0772744	VTN - CFHR2 - CFHR1 - CFHR5 - B2M
	regulation of exocytosis (GO:0017157)	03/52	0.0779678	FGB - FGA - FGG
	sprouting angiogenesis (GO:0002040)	03/52	0.0779678	CDH13 - THBS1 - GPLD1
	response to insulin (GO:0032868)	04/84	0.0782957	PKM - ADIPOQ - PCSK9 - GPLD1
	negative regulation of cellular process (GO:0048523)	16/566	0.0806655	ACTN1 - IGFBP3 - ADIPOQ - APOA1 - FBLN1 - PLG - ENO1 - CLU - KNG1 - AZGP1 - CDH13 - MYH9 - IGFBP6 - TGFBI - HRG - GPLD1
	regulation of programmed cell death (GO:0043067)	07/194	0.081044	PRDX2 - HSP90AA1 - ACTN1 - IGFBP3 - ALB - CLU - AGT
	IRE1-mediated unfolded protein response (GO:0036498)	03/53	0.0815231	ERN1 - HSPA5 - TLN1
	negative regulation of cysteine-type endopeptidase activity (GO:2000117)	03/53	0.0815231	THBS1 - CD44 - LTF
	positive regulation of B cell activation (GO:0050871)	03/53	0.0815231	IGLL5 - TFRC - IGLL1
	cellular response to lipopolysaccharide (GO:0071222)	05/120	0.081685	CD14 - PPBP - LBP - PF4V1 - PF4
	negative regulation of cell junction assembly (GO:1901889)	02/25	0.0825782	APOD - THBS1
	negative regulation of cellular carbohydrate metabolic process (GO:0010677)	02/25	0.0825782	ADIPOQ - MST1
	positive regulation of vascular endothelial growth factor production (GO:0010575)	02/25	0.0825782	C3 - C5
	positive regulation of MAPK cascade (GO:0043410)	09/274	0.0830239	FGB - FGA - SERPINF2 - CARD9 - FGG - IGF2 - APOE - IGF1 - CD44
	negative regulation of cellular amide metabolic process (GO:0034249)	04/86	0.0837144	APOE - IGF1 - CLU - GAPDH
	positive regulation of endothelial cell migration (GO:0010595)	04/86	0.0837144	TMSB4X - THBS1 - GPLD1 - AGT
	organonitrogen compound biosynthetic process (GO:1901566)	06/158	0.0845687	GSTO1 - CSNK2A2 - APOA2 - APOA1 - LCAT - APOE
	regulation of proteolysis (GO:0030162)	03/54	0.0851472	CST3 - F2 - KNG1
	regulation of biomineral tissue development (GO:0070167)	02/26	0.088363	ECM1 - AHSG
	regulation of glycogen biosynthetic process (GO:0005979)	02/26	0.088363	IGF2 - IGF1
	chaperone cofactor-dependent protein refolding (GO:0051085)	02/26	0.088363	HSPA8 - HSPA5
	lamellipodium assembly (GO:0030032)	02/26	0.088363	CDH13 - VCL
	negative regulation of interleukin-1 beta production (GO:0032691)	02/26	0.088363	APOA1 - IGF1
	negative regulation of intrinsic apoptotic signaling pathway in response to DNA damage (GO:1902230)	02/26	0.088363	CLU - CD44
	negative regulation of protein transport (GO:0051224)	02/26	0.088363	ADIPOQ - APOE
	positive regulation of glucose import (GO:0046326)	02/26	0.088363	ADIPOQ - IGF1
	positive regulation of T cell mediated cytotoxicity (GO:0001916)	02/26	0.088363	AZGP1 - HLA-A
	positive regulation of inflammatory response (GO:0050729)	04/89	0.0921768	LBP - S100A9 - S100A8 - AGT
	protein import (GO:0017038)	04/89	0.0921768	HSP90AA1 - LAMP2 - APOE - CLU
	antifungal humoral response (GO:0019732)	01/05	0.0923923	LTF
	C-terminal protein lipidation (GO:0006501)	01/05	0.0923923	GPLD1
	carbon dioxide transport (GO:0015670)	01/05	0.0923923	CA2
	regulation of chromosome separation (GO:1905818)	01/05	0.0923923	CSNK2A2
	catechol-containing compound biosynthetic process (GO:0009713)	01/05	0.0923923	DBH
	regulation of circadian sleep&&wake cycle (GO:0042749)	01/05	0.0923923	PTGDS
	regulation of glycoprotein metabolic process (GO:1903018)	01/05	0.0923923	APCS
	cellular response to nicotine (GO:0071316)	01/05	0.0923923	B2M
	regulation of integrin biosynthetic process (GO:0045113)	01/05	0.0923923	S100A9
	regulation of mononuclear cell proliferation (GO:0032944)	01/05	0.0923923	CRP
	dopamine catabolic process (GO:0042420)	01/05	0.0923923	DBH
	regulation of protein import (GO:1904589)	01/05	0.0923923	HSPA8
	regulation of respiratory burst involved in inflammatory response (GO:0060264)	01/05	0.0923923	LBP
	female genitalia development (GO:0030540)	01/05	0.0923923	RBP4
	regulation of triglyceride metabolic process (GO:0090207)	01/05	0.0923923	C3
	hematopoietic stem cell migration (GO:0035701)	01/05	0.0923923	GPLD1
	His-Purkinje system development (GO:0003164)	01/05	0.0923923	DSG2
	insulin metabolic process (GO:1901142)	01/05	0.0923923	ERN1
	Schwann cell differentiation (GO:0014037)	01/05	0.0923923	ADGRG6
	spliceosomal conformational changes to generate catalytic conformation (GO:0000393)	01/05	0.0923923	XAB2
	lysosomal protein catabolic process (GO:1905146)	01/05	0.0923923	LAMP2
	urate transport (GO:0015747)	01/05	0.0923923	ABCC4
	mRNA cleavage (GO:0006379)	01/05	0.0923923	ERN1
	negative regulation of cardiac muscle cell proliferation (GO:0060044)	01/05	0.0923923	RBP4
	negative regulation of cGMP-mediated signaling (GO:0010754)	01/05	0.0923923	THBS1
	negative regulation of cholesterol biosynthetic process (GO:0045541)	01/05	0.0923923	APOE
	negative regulation of cholesterol metabolic process (GO:0090206)	01/05	0.0923923	APOE
	negative regulation of hydrogen peroxide metabolic process (GO:0010727)	01/05	0.0923923	HP
	negative regulation of IRE1-mediated unfolded protein response (GO:1903895)	01/05	0.0923923	HSPA5
	negative regulation of macrophage chemotaxis (GO:0010760)	01/05	0.0923923	C5
	negative regulation of protein polyubiquitination (GO:1902915)	01/05	0.0923923	PPIA
	negative regulation of RNA polymerase II regulatory region sequence-specific DNA binding (GO:1903026)	01/05	0.0923923	TMSB4X
	negative regulation of sterol biosynthetic process (GO:0106119)	01/05	0.0923923	APOE
	negative regulation of T cell migration (GO:2000405)	01/05	0.0923923	APOD
	negative regulation of transcription by RNA polymerase I (GO:0016479)	01/05	0.0923923	FLNA
	positive regulation of cAMP-dependent protein kinase activity (GO:2000481)	01/05	0.0923923	ADIPOQ
	positive regulation of glycoprotein metabolic process (GO:1903020)	01/05	0.0923923	IGF1
	positive regulation of phospholipase A2 activity (GO:0032430)	01/05	0.0923923	ANG
	prostaglandin transport (GO:0015732)	01/05	0.0923923	ABCC4
	chemokine-mediated signaling pathway (GO:0070098)	03/56	0.0925966	PPBP - PF4V1 - PF4
	cellular lipid catabolic process (GO:0044242)	02/27	0.0942641	ENPP2 - APOA2
	regulation of vascular endothelial growth factor production (GO:0010574)	02/27	0.0942641	C3 - C5
	negative regulation of catalytic activity (GO:0043086)	02/27	0.0942641	HP - SERPINA5
	negative regulation of protein polymerization (GO:0032272)	02/27	0.0942641	CDH5 - PFN1
	positive regulation of nuclear division (GO:0051785)	02/27	0.0942641	IGF2 - IGF1
	positive regulation of toll-like receptor signaling pathway (GO:0034123)	02/27	0.0942641	LBP - LTF
	regulation of reactive oxygen species metabolic process (GO:2000377)	03/57	0.0964191	F2 - THBS1 - AGT
	renal system development (GO:0072001)	03/57	0.0964191	RBP4 - PCSK9 - AGT
	icosanoid metabolic process (GO:0006690)	03/57	0.0964191	PON3 - PNPLA8 - PON1
	positive regulation of cell junction assembly (GO:1901890)	03/57	0.0964191	IL1RAP - HRG - AGT
	receptor clustering (GO:0043113)	02/28	0.100275	PIGR - FLNA
	regulation of B cell activation (GO:0050864)	02/28	0.100275	IGLL5 - IGLL1
	regulation of calcium-mediated signaling (GO:0050848)	02/28	0.100275	ITPR1 - CDH13
	regulation of small molecule metabolic process (GO:0062012)	02/28	0.100275	ADIPOQ - APOE
	sarcomere organization (GO:0045214)	02/28	0.100275	OBSCN - TTN
	keratan sulfate biosynthetic process (GO:0018146)	02/28	0.100275	LUM - OMD
	leukocyte cell-cell adhesion (GO:0007159)	02/28	0.100275	APOA4 - FERMT3
	protein depolymerization (GO:0051261)	02/28	0.100275	GSN - CFL1
	cellular iron ion homeostasis (GO:0006879)	03/58	0.100305	TF - TFRC - CP
	positive regulation of protein binding (GO:0032092)	03/58	0.100305	VTN - APOE - B2M
	protein transport (GO:0015031)	11/369	0.100568	TF - TFRC - LAMP2 - FGG - AFM - MYH9 - APOE - APOB - CLU - OPTN - HSP90B1
	regulation of lipid metabolic process (GO:0019216)	04/92	0.101029	SERPINA3 - APOC2 - APOC1 - APOC3
	positive regulation of cellular component biogenesis (GO:0044089)	04/92	0.101029	CDH5 - TFRC - PFN1 - CLU
	cellular response to insulin stimulus (GO:0032869)	05/129	0.103135	PKM - ADIPOQ - IGF2 - PCSK9 - GPLD1
	positive regulation of apoptotic signaling pathway (GO:2001235)	03/59	0.104253	S100A9 - S100A8 - AGT
	cellular protein-containing complex assembly (GO:0034622)	06/168	0.105479	FGB - FGA - APCS - HSP90AA1 - FGG - CLU
	regulation of response to external stimulus (GO:0032101)	05/130	0.105676	AHSG - TMSB4X - GP1BA - HRG - F2
	actin filament polymerization (GO:0030041)	02/29	0.106389	GSN - ANG
	regulation of gluconeogenesis (GO:0006111)	02/29	0.106389	ADIPOQ - MST1
	regulation of T cell mediated cytotoxicity (GO:0001914)	02/29	0.106389	AZGP1 - HLA-A
	intrinsic apoptotic signaling pathway in response to endoplasmic reticulum stress (GO:0070059)	02/29	0.106389	ERN1 - ITPR1
	lamellipodium organization (GO:0097581)	02/29	0.106389	CDH13 - VCL
	positive regulation of dephosphorylation (GO:0035306)	02/29	0.106389	CDH5 - PPIA
	positive regulation of extrinsic apoptotic signaling pathway (GO:2001238)	02/29	0.106389	THBS1 - AGT
	cellular response to chemokine (GO:1990869)	03/60	0.108261	PPBP - PF4V1 - PF4
	homophilic cell adhesion via plasma membrane adhesion molecules (GO:0007156)	03/60	0.108261	CDH13 - DSG2 - CELSR2
	astrocyte development (GO:0014002)	01/06	0.109823	S100A9
	axo-dendritic transport (GO:0008088)	01/06	0.109823	HSPA8
	bundle of His cell-Purkinje myocyte adhesion involved in cell communication (GO:0086073)	01/06	0.109823	DSG2
	cellular response to bacterial lipopeptide (GO:0071221)	01/06	0.109823	CD14
	cellular response to X-ray (GO:0071481)	01/06	0.109823	PRAP1
	cholesterol import (GO:0070508)	01/06	0.109823	APOA1
	regulation of keratinocyte apoptotic process (GO:1902172)	01/06	0.109823	GSN
	regulation of long-chain fatty acid import across plasma membrane (GO:0010746)	01/06	0.109823	THBS1
	regulation of macromolecule biosynthetic process (GO:0010556)	01/06	0.109823	S100A9
	dendrite extension (GO:0097484)	01/06	0.109823	CDKL3
	regulation of nitric oxide mediated signal transduction (GO:0010749)	01/06	0.109823	THBS1
	regulation of response to reactive oxygen species (GO:1901031)	01/06	0.109823	FBLN5
	regulation of superoxide metabolic process (GO:0090322)	01/06	0.109823	FBLN5
	glycolipid transport (GO:0046836)	01/06	0.109823	PLTP
	histone-serine phosphorylation (GO:0035404)	01/06	0.109823	MST1
	skeletal muscle thin filament assembly (GO:0030240)	01/06	0.109823	TTN
	sterol import (GO:0035376)	01/06	0.109823	APOA1
	striated muscle hypertrophy (GO:0014897)	01/06	0.109823	TTN
	negative regulation of actin filament depolymerization (GO:0030835)	01/06	0.109823	GSN
	negative regulation of astrocyte differentiation (GO:0048712)	01/06	0.109823	F2
	negative regulation of blood vessel endothelial cell proliferation involved in sprouting angiogenesis (GO:1903588)	01/06	0.109823	THBS1
	negative regulation of cardiac muscle tissue growth (GO:0055022)	01/06	0.109823	RBP4
	negative regulation of cellular response to hypoxia (GO:1900038)	01/06	0.109823	ENO1
	negative regulation of lamellipodium organization (GO:1902744)	01/06	0.109823	HRG
	negative regulation of myeloid cell apoptotic process (GO:0033033)	01/06	0.109823	APOH
	neurotransmitter-gated ion channel clustering (GO:0072578)	01/06	0.109823	APOE
	norepinephrine biosynthetic process (GO:0042421)	01/06	0.109823	DBH
	polyphosphate metabolic process (GO:0006797)	01/06	0.109823	MINPP1
	positive regulation of cholesterol storage (GO:0010886)	01/06	0.109823	APOB
	positive regulation of extrinsic apoptotic signaling pathway via death domain receptors (GO:1902043)	01/06	0.109823	THBS1
	positive regulation of gap junction assembly (GO:1903598)	01/06	0.109823	AGT
	positive regulation of immune response to tumor cell (GO:0002839)	01/06	0.109823	HRG
	positive regulation of lipoprotein particle clearance (GO:0010986)	01/06	0.109823	GPLD1
	positive regulation of osteoblast proliferation (GO:0033690)	01/06	0.109823	LTF
	positive regulation of receptor binding (GO:1900122)	01/06	0.109823	B2M
	positive regulation of sterol transport (GO:0032373)	01/06	0.109823	CETP
	protection from natural killer cell mediated cytotoxicity (GO:0042270)	01/06	0.109823	HLA-A
	regulation of macrophage activation (GO:0043030)	02/30	0.112601	LBP - THBS1
	RNA-dependent DNA biosynthetic process (GO:0006278)	02/30	0.112601	HSP90AA1 - PPIA
	maintenance of blood-brain barrier (GO:0035633)	02/30	0.112601	CDH5 - VCL
	negative regulation of interleukin-1 production (GO:0032692)	02/30	0.112601	APOA1 - IGF1
	positive regulation of phosphate metabolic process (GO:0045937)	02/30	0.112601	ANG - THBS1
	positive regulation of interleukin-1 production (GO:0032732)	03/62	0.116452	ORM1 - SAA1 - ORM2
	protein maturation (GO:0051604)	04/97	0.116613	F7 - ADAMTS13 - F12 - CPN1
	'de novo' posttranslational protein folding (GO:0051084)	02/31	0.118904	HSPA8 - HSPA5
	regulation of cellular pH (GO:0030641)	02/31	0.118904	CA2 - SLC4A1
	regulation of developmental growth (GO:0048638)	02/31	0.118904	APOE - IGF1
	negative regulation of response to DNA damage stimulus (GO:2001021)	02/31	0.118904	CLU - CD44
	positive regulation of RNA splicing (GO:0033120)	02/31	0.118904	ERN1 - PRDX6
	prostaglandin metabolic process (GO:0006693)	02/31	0.118904	PNPLA8 - PTGDS
	positive regulation of defense response (GO:0031349)	04/98	0.119849	S100A9 - OPTN - S100A8 - AGT
	actin cytoskeleton reorganization (GO:0031532)	03/63	0.120633	GSN - MYH9 - FLNA
	organonitrogen compound catabolic process (GO:1901565)	03/63	0.120633	ADAMTS13 - PNPLA8 - ENPP2
	regulation of extrinsic apoptotic signaling pathway (GO:2001236)	03/64	0.124868	IGF1 - THBS1 - AGT
	negative regulation of intrinsic apoptotic signaling pathway (GO:2001243)	03/64	0.124868	ENO1 - CLU - PPIA
	regulation of cell morphogenesis (GO:0022604)	02/32	0.125292	CFL1 - CD44
	regulation of cellular biosynthetic process (GO:0031326)	02/32	0.125292	C3 - ADIPOQ
	regulation of intracellular protein transport (GO:0033157)	02/32	0.125292	ADIPOQ - LCP1
	endodermal cell differentiation (GO:0035987)	02/32	0.125292	VTN - FN1
	negative regulation of cell-matrix adhesion (GO:0001953)	02/32	0.125292	APOD - THBS1
	negative regulation of chemotaxis (GO:0050922)	02/32	0.125292	HRG - THBS1
	regulation of cell growth (GO:0001558)	07/217	0.125573	TFRC - ENO1 - HRG - PRSS2 - S100A9 - AGT - S100A8
	positive regulation of developmental process (GO:0051094)	06/177	0.126376	TFRC - CFL1 - SERPINF2 - MST1 - ENPP2 - APOE
	purine-containing compound metabolic process (GO:0072521)	01/07	0.126919	TTR
	angiotensin-activated signaling pathway (GO:0038166)	01/07	0.126919	CA2
	astrocyte differentiation (GO:0048708)	01/07	0.126919	S100A9
	regulation of atrial cardiac muscle cell membrane repolarization (GO:0060372)	01/07	0.126919	FLNA
	regulation of cGMP-mediated signaling (GO:0010752)	01/07	0.126919	THBS1
	cardiac muscle cell-cardiac muscle cell adhesion (GO:0086042)	01/07	0.126919	DSG2
	catecholamine catabolic process (GO:0042424)	01/07	0.126919	DBH
	cellular ion homeostasis (GO:0006873)	01/07	0.126919	SLC4A1
	regulation of extracellular matrix assembly (GO:1901201)	01/07	0.126919	AGT
	cyclic nucleotide transport (GO:0070729)	01/07	0.126919	ABCC4
	desmosome organization (GO:0002934)	01/07	0.126919	DSG2
	detection of molecule of bacterial origin (GO:0032490)	01/07	0.126919	LBP
	detection of muscle stretch (GO:0035995)	01/07	0.126919	TTN
	regulation of NAD(P)H oxidase activity (GO:0033860)	01/07	0.126919	AGT
	regulation of neurotrophin TRK receptor signaling pathway (GO:0051386)	01/07	0.126919	AGT
	regulation of transforming growth factor beta1 production (GO:0032908)	01/07	0.126919	THBS1
	regulation of vascular associated smooth muscle cell apoptotic process (GO:1905459)	01/07	0.126919	IGF1
	heme transport (GO:0015886)	01/07	0.126919	HRG
	hemostasis (GO:0007599)	01/07	0.126919	VWF
	response to host defenses (GO:0052200)	01/07	0.126919	B2M
	iron import into cell (GO:0033212)	01/07	0.126919	LTF
	keratinocyte proliferation (GO:0043616)	01/07	0.126919	CDH13
	leukotriene transport (GO:0071716)	01/07	0.126919	ABCC4
	thyroid hormone transport (GO:0070327)	01/07	0.126919	SERPINA7
	modulation by symbiont of host defense response (GO:0052031)	01/07	0.126919	B2M
	xenobiotic catabolic process (GO:0042178)	01/07	0.126919	GSTO1
	negative regulation of acute inflammatory response (GO:0002674)	01/07	0.126919	APCS
	negative regulation of intracellular transport (GO:0032387)	01/07	0.126919	ADIPOQ
	negative regulation of MyD88-independent toll-like receptor signaling pathway (GO:0034128)	01/07	0.126919	CD14
	negative regulation of neurotransmitter secretion (GO:0046929)	01/07	0.126919	RAP1B
	negative regulation of protein import (GO:1904590)	01/07	0.126919	APOD
	negative regulation of protein import into nucleus (GO:0042308)	01/07	0.126919	APOD
	negative regulation of stress-activated protein kinase signaling cascade (GO:0070303)	01/07	0.126919	PPIA
	norepinephrine metabolic process (GO:0042415)	01/07	0.126919	DBH
	oxygen transport (GO:0015671)	01/07	0.126919	HBB
	positive regulation of activation of Janus kinase activity (GO:0010536)	01/07	0.126919	AGT
	positive regulation of amyloid-beta clearance (GO:1900223)	01/07	0.126919	APOE
	positive regulation of cytoplasmic translation (GO:2000767)	01/07	0.126919	PKM
	positive regulation of integrin-mediated signaling pathway (GO:2001046)	01/07	0.126919	FLNA
	positive regulation of lamellipodium morphogenesis (GO:2000394)	01/07	0.126919	ENPP2
	positive regulation of mitophagy in response to mitochondrial depolarization (GO:0098779)	01/07	0.126919	OPTN
	positive regulation of podosome assembly (GO:0071803)	01/07	0.126919	LCP1
	positive regulation of striated muscle contraction (GO:0045989)	01/07	0.126919	GSTO1
	posttranslational protein targeting to membrane, translocation (GO:0031204)	01/07	0.126919	HSPA5
	protein catabolic process in the vacuole (GO:0007039)	01/07	0.126919	LAMP2
	regulation of cell-matrix adhesion (GO:0001952)	03/65	0.129157	CDH13 - THBS1 - VCL
	cellular component assembly (GO:0022607)	08/261	0.131129	FGA - GSN - FLNA - QSOX1 - IL1RAP - LCP1 - YWHAZ - JCHAIN
	regulation of immune response (GO:0050776)	06/179	0.131275	C3 - FCGR3A - AMBP - SELL - HLA-A - B2M
	actin filament bundle assembly (GO:0051017)	02/33	0.13176	LCP1 - HSP90B1
	antigen processing and presentation of peptide antigen via MHC class I (GO:0002474)	02/33	0.13176	HLA-A - B2M
	regulation of sprouting angiogenesis (GO:1903670)	02/33	0.13176	PKM - THBS1
	keratan sulfate metabolic process (GO:0042339)	02/33	0.13176	LUM - OMD
	muscle cell development (GO:0055001)	02/33	0.13176	IGF1 - TTN
	neuron projection extension (GO:1990138)	02/33	0.13176	CDKL3 - HSP90AA1
	positive regulation of cytokine production involved in immune response (GO:0002720)	02/33	0.13176	HLA-A - B2M
	primary alcohol metabolic process (GO:0034308)	02/33	0.13176	RBP4 - IGF1
	regulation of cell death (GO:0010941)	04/102	0.133172	HP - HBB - HPR - CLU
	cell junction assembly (GO:0034329)	04/102	0.133172	CDH5 - FN1 - FLNA - TLN1
	positive regulation of cell growth (GO:0030307)	04/102	0.133172	IGF1 - PRSS2 - S100A9 - S100A8
	positive regulation of cellular protein metabolic process (GO:0032270)	04/102	0.133172	HSP90AA1 - EEF2 - THBS1 - AGT
	cell-cell junction assembly (GO:0007043)	03/66	0.133497	CDH5 - TLN1 - VCL
	ERBB signaling pathway (GO:0038127)	03/66	0.133497	PIGR - HSP90AA1 - EFEMP1
	positive regulation of T cell proliferation (GO:0042102)	03/66	0.133497	TFRC - IGF2 - IGF1
	positive regulation of catabolic process (GO:0009896)	03/67	0.137887	APOA2 - C4BPA - C4BPB
	regulation of activated T cell proliferation (GO:0046006)	02/34	0.138303	IGF2 - IGF1
	B cell receptor signaling pathway (GO:0050853)	02/34	0.138303	IGLL5 - IGLL1
	regulation of cell adhesion mediated by integrin (GO:0033628)	02/34	0.138303	HRG - FERMT3
	cardiac muscle contraction (GO:0060048)	02/34	0.138303	GSN - TTN
	cell-substrate junction assembly (GO:0007044)	02/34	0.138303	ACTN1 - FN1
	regulation of glucose metabolic process (GO:0010906)	02/34	0.138303	ADIPOQ - GPLD1
	secondary alcohol biosynthetic process (GO:1902653)	02/34	0.138303	APOA1 - APOA4
	striated muscle tissue development (GO:0014706)	02/34	0.138303	MYL6 - RBP4
	positive regulation of protein dephosphorylation (GO:0035307)	02/34	0.138303	CDH5 - PPIA
	positive regulation of release of sequestered calcium ion into cytosol (GO:0051281)	02/34	0.138303	GSTO1 - F2
	monocarboxylic acid metabolic process (GO:0032787)	05/143	0.141394	LDHB - BTD - PNPLA8 - HYI - IGF1
	interferon-gamma-mediated signaling pathway (GO:0060333)	03/68	0.142325	HLA-A - B2M - CD44
	positive regulation of protein localization to nucleus (GO:1900182)	03/68	0.142325	TFRC - FLNA - F2
	actin filament reorganization (GO:0090527)	01/08	0.143688	GSN
	alpha-beta T cell activation (GO:0046631)	01/08	0.143688	HLA-A
	regulation of activation of Janus kinase activity (GO:0010533)	01/08	0.143688	AGT
	regulation of anion transport (GO:0044070)	01/08	0.143688	CA2
	regulation of CD8-positive, alpha-beta T cell proliferation (GO:2000564)	01/08	0.143688	HLA-A
	brown fat cell differentiation (GO:0050873)	01/08	0.143688	ADIPOQ
	regulation of chaperone-mediated autophagy (GO:1904714)	01/08	0.143688	EEF1A1
	cardiac muscle hypertrophy (GO:0003300)	01/08	0.143688	TTN
	cell-cell adhesion mediated by cadherin (GO:0044331)	01/08	0.143688	CDH5
	regulation of dendritic spine maintenance (GO:1902950)	01/08	0.143688	APOE
	cellular response to angiotensin (GO:1904385)	01/08	0.143688	CA2
	regulation of extent of cell growth (GO:0061387)	01/08	0.143688	APOE
	cytoplasmic sequestering of NF-kappaB (GO:0007253)	01/08	0.143688	TMSB4X
	regulation of MyD88-independent toll-like receptor signaling pathway (GO:0034127)	01/08	0.143688	CD14
	diacylglycerol biosynthetic process (GO:0006651)	01/08	0.143688	ANG
	regulation of nitrogen compound metabolic process (GO:0051171)	01/08	0.143688	APOE
	regulation of osteoclast development (GO:2001204)	01/08	0.143688	LTF
	establishment of Golgi localization (GO:0051683)	01/08	0.143688	YWHAZ
	regulation of RNA biosynthetic process (GO:2001141)	01/08	0.143688	FCN3
	fructose metabolic process (GO:0006000)	01/08	0.143688	ALDOA
	fusion of virus membrane with host plasma membrane (GO:0019064)	01/08	0.143688	PPIA
	glyoxylate metabolic process (GO:0046487)	01/08	0.143688	HYI
	skeletal myofibril assembly (GO:0014866)	01/08	0.143688	TTN
	T cell mediated cytotoxicity (GO:0001913)	01/08	0.143688	HLA-A
	membrane fusion involved in viral entry into host cell (GO:0039663)	01/08	0.143688	PPIA
	myeloid leukocyte mediated immunity (GO:0002444)	01/08	0.143688	CARD9
	negative regulation of long-term synaptic potentiation (GO:1900272)	01/08	0.143688	APOE
	negative regulation of macrophage migration (GO:1905522)	01/08	0.143688	C5
	negative regulation of mitochondrial fusion (GO:0010637)	01/08	0.143688	TFRC
	negative regulation of muscle cell differentiation (GO:0051148)	01/08	0.143688	IGF2
	negative regulation of regulated secretory pathway (GO:1903306)	01/08	0.143688	RAP1B
	peptidyl-serine autophosphorylation (GO:0036289)	01/08	0.143688	ERN1
	positive regulation of cysteine-type endopeptidase activity involved in apoptotic signaling pathway (GO:2001269)	01/08	0.143688	GSN
	positive regulation of fibroblast migration (GO:0010763)	01/08	0.143688	THBS1
	positive regulation of insulin-like growth factor receptor signaling pathway (GO:0043568)	01/08	0.143688	IGF1
	positive regulation of membrane invagination (GO:1905155)	01/08	0.143688	C3
	positive regulation of monocyte chemotactic protein-1 production (GO:0071639)	01/08	0.143688	ADIPOQ
	positive regulation of muscle contraction (GO:0045933)	01/08	0.143688	ENO1
	positive regulation of myeloid cell apoptotic process (GO:0033034)	01/08	0.143688	ADIPOQ
	positive regulation of ryanodine-sensitive calcium-release channel activity (GO:0060316)	01/08	0.143688	GSTO1
	acylglycerol catabolic process (GO:0046464)	02/35	0.144915	APOA2 - APOC3
	cholesterol biosynthetic process (GO:0006695)	02/35	0.144915	APOA1 - APOA4
	regulation of protein polymerization (GO:0032271)	02/35	0.144915	HSP90AA1 - PFN1
	positive regulation of immunoglobulin production (GO:0002639)	02/35	0.144915	RBP4 - TFRC
	positive regulation of lymphocyte activation (GO:0051251)	02/35	0.144915	IGLL5 - IGLL1
	cellular response to peptide hormone stimulus (GO:0071375)	04/106	0.147071	PKM - ADIPOQ - PCSK9 - GPLD1
	regulation of phosphatidylinositol 3-kinase signaling (GO:0014066)	04/106	0.147071	CRNN - FN1 - IGF1 - AGT
	positive regulation of cellular process (GO:0048522)	16/625	0.149987	AHSG - SERPINF2 - FN1 - IGF2 - HP - APOA2 - HBB - APOA1 - HPR - IGF1 - THBS1 - SAA1 - LBP - PRSS2 - S100A9 - S100A8
	cellular response to heat (GO:0034605)	02/36	0.151591	HSP90AA1 - THBS1
	cyclic-nucleotide-mediated signaling (GO:0019935)	02/36	0.151591	ADGRG6 - APOE
	regulation of ossification (GO:0030278)	02/36	0.151591	ECM1 - AHSG
	endoderm formation (GO:0001706)	02/36	0.151591	VTN - FN1
	regulation of protein import into nucleus (GO:0042306)	02/36	0.151591	FLNA - APOD
	transferrin transport (GO:0033572)	02/36	0.151591	TF - TFRC
	positive regulation of mitotic nuclear division (GO:0045840)	02/36	0.151591	IGF2 - IGF1
	regulation of glucose import (GO:0046324)	02/37	0.158327	ADIPOQ - IGF1
	regulation of intracellular pH (GO:0051453)	02/37	0.158327	CA2 - SLC4A1
	negative regulation of stress-activated MAPK cascade (GO:0032873)	02/37	0.158327	AMBP - PPIA
	actin-mediated cell contraction (GO:0070252)	01/09	0.160136	GSN
	purine nucleobase metabolic process (GO:0006144)	01/09	0.160136	TTR
	axon regeneration (GO:0031103)	01/09	0.160136	APOD
	biotin metabolic process (GO:0006768)	01/09	0.160136	BTD
	regulation of CD8-positive, alpha-beta T cell activation (GO:2001185)	01/09	0.160136	HLA-A
	regulation of cell adhesion molecule production (GO:0060353)	01/09	0.160136	APOA1
	bundle of His cell to Purkinje myocyte communication (GO:0086069)	01/09	0.160136	DSG2
	regulation of cellular response to oxidative stress (GO:1900407)	01/09	0.160136	FBLN5
	regulation of complement-dependent cytotoxicity (GO:1903659)	01/09	0.160136	CFH
	regulation of dendritic cell antigen processing and presentation (GO:0002604)	01/09	0.160136	THBS1
	regulation of endothelial cell development (GO:1901550)	01/09	0.160136	VCL
	regulation of gap junction assembly (GO:1903596)	01/09	0.160136	AGT
	cholesterol catabolic process (GO:0006707)	01/09	0.160136	APOE
	regulation of mammary gland epithelial cell proliferation (GO:0033599)	01/09	0.160136	MST1
	regulation of PERK-mediated unfolded protein response (GO:1903897)	01/09	0.160136	HSPA5
	epithelial cell apoptotic process (GO:1904019)	01/09	0.160136	GSN
	regulation of respiratory burst (GO:0060263)	01/09	0.160136	JCHAIN
	regulation of RNA polymerase II regulatory region sequence-specific DNA binding (GO:1903025)	01/09	0.160136	TMSB4X
	fructose 1,6-bisphosphate metabolic process (GO:0030388)	01/09	0.160136	ALDOA
	glomerular filtration (GO:0003094)	01/09	0.160136	JCHAIN
	regulation of tumor necrosis factor superfamily cytokine production (GO:1903555)	01/09	0.160136	LTF
	response to magnesium ion (GO:0032026)	01/09	0.160136	THBS1
	hormone transport (GO:0009914)	01/09	0.160136	SERPINA7
	icosanoid transport (GO:0071715)	01/09	0.160136	ABCC4
	Schwann cell development (GO:0014044)	01/09	0.160136	ADGRG6
	L-ascorbic acid metabolic process (GO:0019852)	01/09	0.160136	GSTO1
	sterol catabolic process (GO:0016127)	01/09	0.160136	APOE
	negative regulation of glial cell differentiation (GO:0045686)	01/09	0.160136	F2
	negative regulation of leukocyte proliferation (GO:0070664)	01/09	0.160136	CRP
	negative regulation of lipid localization (GO:1905953)	01/09	0.160136	CRP
	one-carbon compound transport (GO:0019755)	01/09	0.160136	CA2
	peripheral nervous system axon ensheathment (GO:0032292)	01/09	0.160136	ADGRG6
	phenol-containing compound biosynthetic process (GO:0046189)	01/09	0.160136	DBH
	positive regulation of CD8-positive, alpha-beta T cell activation (GO:2001187)	01/09	0.160136	HLA-A
	positive regulation of cell-cell adhesion mediated by cadherin (GO:2000049)	01/09	0.160136	SERPINF2
	positive regulation of ligase activity (GO:0051351)	01/09	0.160136	TMSB4X
	positive regulation of phagocytosis, engulfment (GO:0060100)	01/09	0.160136	C3
	positive regulation of protein kinase A signaling (GO:0010739)	01/09	0.160136	ADIPOQ
	positive regulation of sequestering of triglyceride (GO:0010890)	01/09	0.160136	APOC4
	negative regulation of cell differentiation (GO:0045596)	06/191	0.162496	CRP - CETP - EFEMP1 - ADIPOQ - IGF2 - VASN
	regulation of apoptotic signaling pathway (GO:2001233)	02/38	0.165117	CSNK2A2 - PPIA
	regulation of axon extension (GO:0030516)	02/38	0.165117	CDKL3 - APOE
	sterol biosynthetic process (GO:0016126)	02/38	0.165117	APOA1 - APOA4
	negative regulation of innate immune response (GO:0045824)	02/38	0.165117	SERPING1 - A2M
	positive regulation of cell development (GO:0010720)	02/38	0.165117	SERPINF1 - ADIPOQ
	positive regulation of insulin secretion (GO:0032024)	02/38	0.165117	RBP4 - GPLD1
	regulation of Rho protein signal transduction (GO:0035023)	03/73	0.165194	APOA1 - APOC3 - APOE
	regulation of stress fiber assembly (GO:0051492)	03/74	0.169893	SERPINF2 - APOA1 - PFN1
	regulation of nitric-oxide synthase activity (GO:0050999)	02/39	0.171957	HSP90AA1 - APOE
	positive regulation of protein kinase activity (GO:0045860)	05/154	0.175159	HSP90AA1 - AGAP2 - CLU - AGT - LTF
	adherens junction assembly (GO:0034333)	01/10	0.176269	VCL
	Rap protein signal transduction (GO:0032486)	01/10	0.176269	RAP1B
	arachidonate transport (GO:1903963)	01/10	0.176269	PNPLA8
	arachidonic acid secretion (GO:0050482)	01/10	0.176269	PNPLA8
	regulation of cell activation (GO:0050865)	01/10	0.176269	HRG
	regulation of cell-cell adhesion mediated by integrin (GO:0033632)	01/10	0.176269	FERMT3
	regulation of glycoprotein biosynthetic process (GO:0010559)	01/10	0.176269	IGF1
	regulation of macrophage migration (GO:1905521)	01/10	0.176269	MST1
	defense response to tumor cell (GO:0002357)	01/10	0.176269	PRDX2
	DNA replication-dependent nucleosome assembly (GO:0006335)	01/10	0.176269	H4-16
	DNA replication-dependent nucleosome organization (GO:0034723)	01/10	0.176269	H4-16
	regulation of phagocytosis, engulfment (GO:0060099)	01/10	0.176269	C3
	regulation of T-helper 17 type immune response (GO:2000316)	01/10	0.176269	CARD9
	genetic imprinting (GO:0071514)	01/10	0.176269	IGF2
	renal filtration (GO:0097205)	01/10	0.176269	JCHAIN
	immunoglobulin mediated immune response (GO:0016064)	01/10	0.176269	CARD9
	lipoprotein transport (GO:0042953)	01/10	0.176269	APOB
	low-density lipoprotein particle receptor catabolic process (GO:0032802)	01/10	0.176269	PCSK9
	low-density lipoprotein receptor particle metabolic process (GO:0032799)	01/10	0.176269	PCSK9
	membrane lipid catabolic process (GO:0046466)	01/10	0.176269	ENPP2
	UV protection (GO:0009650)	01/10	0.176269	CAT
	myelin maintenance (GO:0043217)	01/10	0.176269	CLU
	negative regulation of cell adhesion mediated by integrin (GO:0033629)	01/10	0.176269	HRG
	negative regulation of cell-cell adhesion mediated by cadherin (GO:2000048)	01/10	0.176269	PLG
	negative regulation of extracellular matrix organization (GO:1903054)	01/10	0.176269	CST3
	negative regulation of lipopolysaccharide-mediated signaling pathway (GO:0031665)	01/10	0.176269	LTF
	negative regulation of protein autophosphorylation (GO:0031953)	01/10	0.176269	ADIPOQ
	negative regulation of sodium ion transmembrane transport (GO:1902306)	01/10	0.176269	PCSK9
	negative regulation of sodium ion transmembrane transporter activity (GO:2000650)	01/10	0.176269	PCSK9
	negative regulation of transforming growth factor beta production (GO:0071635)	01/10	0.176269	FN1
	negative regulation of transmembrane transport (GO:0034763)	01/10	0.176269	THBS1
	negative regulation of vascular endothelial growth factor signaling pathway (GO:1900747)	01/10	0.176269	HRG
	pinocytosis (GO:0006907)	01/10	0.176269	AHSG
	positive regulation of lipase activity (GO:0060193)	01/10	0.176269	APOC2
	positive regulation of tissue remodeling (GO:0034105)	01/10	0.176269	HRG
	positive regulation of vascular endothelial growth factor receptor signaling pathway (GO:0030949)	01/10	0.176269	VTN
	detection of chemical stimulus involved in sensory perception of bitter taste (GO:0001580)	02/40	0.178843	PIGR - AZGP1
	sulfur compound catabolic process (GO:0044273)	02/40	0.178843	LUM - OMD
	organic hydroxy compound transport (GO:0015850)	02/40	0.178843	ABCC4 - RBP4
	positive regulation of catalytic activity (GO:0043085)	02/40	0.178843	IGF2 - APOA1
	positive regulation of cation channel activity (GO:2001259)	02/40	0.178843	GSTO1 - TMSB4X
	positive regulation of intrinsic apoptotic signaling pathway (GO:2001244)	02/40	0.178843	S100A9 - S100A8
	actomyosin structure organization (GO:0031032)	03/76	0.179404	OBSCN - MYH9 - TTN
	phospholipid metabolic process (GO:0006644)	03/76	0.179404	ENPP2 - APOA2 - LCAT
	positive regulation of growth (GO:0045927)	03/76	0.179404	PRSS2 - S100A9 - S100A8
	regulation of signal transduction (GO:0009966)	06/198	0.18205	IGFBP4 - IGFBP3 - ADIPOQ - IGFBP6 - CLU - PPIA
	positive regulation of angiogenesis (GO:0045766)	04/116	0.184059	CDH5 - ECM1 - PKM - THBS1
	positive regulation of phosphatidylinositol 3-kinase signaling (GO:0014068)	03/77	0.184213	FN1 - IGF1 - AGT
	positive regulation of type I interferon production (GO:0032481)	03/77	0.184213	HSP90AA1 - CD14 - GAPDH
	regulation of release of cytochrome c from mitochondria (GO:0090199)	02/41	0.185771	IGF1 - CLU
	sensory perception of bitter taste (GO:0050913)	02/41	0.185771	PIGR - AZGP1
	cellular response to starvation (GO:0009267)	05/158	0.18814	HSPA8 - HSPA5 - LAMP2 - ALB - PCSK9
	negative regulation of protein serine&&threonine kinase activity (GO:0071901)	03/78	0.189055	ADIPOQ - APOE - AGT
	alcohol catabolic process (GO:0046164)	01/11	0.192092	APOE
	rDNA heterochromatin assembly (GO:0000183)	01/11	0.192092	H4-16
	B cell mediated immunity (GO:0019724)	01/11	0.192092	CARD9
	regulation of cysteine-type endopeptidase activity involved in apoptotic signaling pathway (GO:2001267)	01/11	0.192092	GSN
	cellular response to cholesterol (GO:0071397)	01/11	0.192092	GPLD1
	regulation of gene expression by genetic imprinting (GO:0006349)	01/11	0.192092	IGF2
	regulation of histone exchange (GO:1900049)	01/11	0.192092	H4-16
	central nervous system myelination (GO:0022010)	01/11	0.192092	CLU
	regulation of lipid kinase activity (GO:0043550)	01/11	0.192092	F2
	complement receptor mediated signaling pathway (GO:0002430)	01/11	0.192092	GPLD1
	cyclooxygenase pathway (GO:0019371)	01/11	0.192092	PTGDS
	regulation of mitochondrial fusion (GO:0010635)	01/11	0.192092	TFRC
	regulation of phospholipase activity (GO:0010517)	01/11	0.192092	APOC2
	embryonic eye morphogenesis (GO:0048048)	01/11	0.192092	EFEMP1
	fatty acid homeostasis (GO:0055089)	01/11	0.192092	APOE
	regulation of synapse maturation (GO:0090128)	01/11	0.192092	YWHAZ
	glucocorticoid biosynthetic process (GO:0006704)	01/11	0.192092	SERPINA6
	glucocorticoid metabolic process (GO:0008211)	01/11	0.192092	SERPINA6
	Golgi inheritance (GO:0048313)	01/11	0.192092	YWHAZ
	hepatocyte growth factor receptor signaling pathway (GO:0048012)	01/11	0.192092	MST1
	insulin-like growth factor receptor signaling pathway (GO:0048009)	01/11	0.192092	IGF1
	lipoprotein biosynthetic process (GO:0042158)	01/11	0.192092	APOE
	lipoprotein catabolic process (GO:0042159)	01/11	0.192092	APOE
	lipoprotein localization (GO:0044872)	01/11	0.192092	APOB
	tetrahydrobiopterin metabolic process (GO:0046146)	01/11	0.192092	HSP90AA1
	vasoconstriction (GO:0042310)	01/11	0.192092	CRP
	monocyte differentiation (GO:0030224)	01/11	0.192092	MYH9
	myotube cell development (GO:0014904)	01/11	0.192092	IGF1
	negative regulation of lymphocyte migration (GO:2000402)	01/11	0.192092	APOD
	negative regulation of response to cytokine stimulus (GO:0060761)	01/11	0.192092	APOA1
	negative regulation of sprouting angiogenesis (GO:1903671)	01/11	0.192092	THBS1
	PERK-mediated unfolded protein response (GO:0036499)	01/11	0.192092	HSPA5
	positive regulation of actin nucleation (GO:0051127)	01/11	0.192092	GSN
	positive regulation of histone exchange (GO:1900051)	01/11	0.192092	H4-16
	positive regulation of integrin activation (GO:0033625)	01/11	0.192092	RAP1B
	positive regulation of keratinocyte proliferation (GO:0010838)	01/11	0.192092	CRNN
	positive regulation of macrophage differentiation (GO:0045651)	01/11	0.192092	PF4
	positive regulation of transcription from RNA polymerase II promoter in response to endoplasmic reticulum stress (GO:1990440)	01/11	0.192092	HSPA5
	positive regulation of triglyceride biosynthetic process (GO:0010867)	01/11	0.192092	GPLD1
	regulation of ubiquitin-dependent protein catabolic process (GO:2000058)	02/42	0.192735	CSNK2A2 - CLU
	regulation of ion transport (GO:0043269)	03/79	0.19393	TF - CA2 - B2M
	positive regulation of cysteine-type endopeptidase activity involved in apoptotic process (GO:0043280)	04/119	0.195705	GSN - CARD9 - S100A9 - S100A8
	positive regulation of protein kinase B signaling (GO:0051897)	05/161	0.198096	F7 - HSP90AA1 - F10 - IGF2 - THBS1
	regulation of cell-cell adhesion (GO:0022407)	02/43	0.199733	CELSR2 - FERMT3
	myofibril assembly (GO:0030239)	02/43	0.199733	OBSCN - TTN
	positive regulation of leukocyte mediated cytotoxicity (GO:0001912)	02/43	0.199733	AZGP1 - HLA-A
	cellular response to interferon-gamma (GO:0071346)	04/121	0.203592	HLA-A - B2M - GAPDH - CD44
	protein homooligomerization (GO:0051260)	04/121	0.203592	C9 - CARD9 - ALDOA - B2M
	negative regulation of protein modification process (GO:0031400)	03/81	0.203772	IGFBP3 - FBLN1 - PPIA
	positive regulation of cellular amide metabolic process (GO:0034250)	03/81	0.203772	EEF2 - CLU - THBS1
	positive regulation of macromolecule metabolic process (GO:0010604)	10/384	0.205661	CRP - CDH5 - GSN - TFRC - FN1 - PCSK9 - IGF1 - CLU - PF4 - TTN
	detection of chemical stimulus involved in sensory perception of taste (GO:0050912)	02/44	0.206761	PIGR - AZGP1
	embryonic organ morphogenesis (GO:0048562)	02/44	0.206761	RBP4 - EFEMP1
	positive regulation of cell-matrix adhesion (GO:0001954)	02/44	0.206761	CDH13 - HRG
	positive regulation of osteoblast differentiation (GO:0045669)	02/44	0.206761	IGF1 - LTF
	positive regulation of stress fiber assembly (GO:0051496)	02/44	0.206761	SERPINF2 - APOA1
	regulation of actin nucleation (GO:0051125)	01/12	0.207612	GSN
	regulation of amyloid precursor protein catabolic process (GO:1902991)	01/12	0.207612	APOE
	regulation of astrocyte differentiation (GO:0048710)	01/12	0.207612	F2
	C-terminal protein amino acid modification (GO:0018410)	01/12	0.207612	GPLD1
	catecholamine biosynthetic process (GO:0042423)	01/12	0.207612	DBH
	regulation of MHC class II biosynthetic process (GO:0045346)	01/12	0.207612	PF4
	depurination (GO:0045007)	01/12	0.207612	H4-16
	epithelial cell-cell adhesion (GO:0090136)	01/12	0.207612	VCL
	regulation of vascular associated smooth muscle cell migration (GO:1904752)	01/12	0.207612	ADIPOQ
	regulation of ventricular cardiac muscle cell action potential (GO:0098911)	01/12	0.207612	DSG2
	Golgi localization (GO:0051645)	01/12	0.207612	YWHAZ
	macrophage chemotaxis (GO:0048246)	01/12	0.207612	SAA1
	maintenance of protein localization in endoplasmic reticulum (GO:0035437)	01/12	0.207612	HSPA5
	negative regulation of cellular response to vascular endothelial growth factor stimulus (GO:1902548)	01/12	0.207612	HRG
	negative regulation of leukocyte chemotaxis (GO:0002689)	01/12	0.207612	C5
	negative regulation of microtubule polymerization (GO:0031115)	01/12	0.207612	CDH5
	negative regulation of oxidoreductase activity (GO:0051354)	01/12	0.207612	HP
	negative regulation of release of sequestered calcium ion into cytosol (GO:0051280)	01/12	0.207612	GSTO1
	negative regulation of ryanodine-sensitive calcium-release channel activity (GO:0060315)	01/12	0.207612	GSTO1
	positive regulation of branching involved in ureteric bud morphogenesis (GO:0090190)	01/12	0.207612	AGT
	positive regulation of cellular senescence (GO:2000774)	01/12	0.207612	B2M
	positive regulation of endoplasmic reticulum unfolded protein response (GO:1900103)	01/12	0.207612	ERN1
	positive regulation of T-helper 17 type immune response (GO:2000318)	01/12	0.207612	CARD9
	posttranslational protein targeting to endoplasmic reticulum membrane (GO:0006620)	01/12	0.207612	HSPA5
	regulation of defense response (GO:0031347)	03/83	0.213726	AHSG - TMSB4X - APOE
	regulation of insulin receptor signaling pathway (GO:0046626)	02/45	0.213814	AHSG - IGF2
	positive regulation of nervous system development (GO:0051962)	02/45	0.213814	SERPINF1 - IL1RAP
	fatty acid metabolic process (GO:0006631)	04/124	0.215594	PON3 - PNPLA8 - ADIPOQ - PON1
	cellular response to cytokine stimulus (GO:0071345)	12/482	0.218381	CRNN - HSPA8 - HSP90AA1 - FN1 - SAA1 - F13A1 - IL1RAP - LBP - YWHAZ - GAPDH - PF4 - HSP90B1
	regulation of phosphorylation (GO:0042325)	04/125	0.219638	CDH5 - FN1 - ANG - THBS1
	regulation of cellular protein localization (GO:1903827)	02/46	0.220889	HSP90AA1 - LCP1
	establishment of protein localization to extracellular region (GO:0035592)	02/46	0.220889	FGG - AFM
	positive regulation of response to stimulus (GO:0048584)	02/46	0.220889	ADIPOQ - B2M
	pteridine-containing compound metabolic process (GO:0042558)	01/13	0.222835	HSP90AA1
	antifungal innate immune response (GO:0061760)	01/13	0.222835	CARD9
	cardiac cell development (GO:0055006)	01/13	0.222835	TTN
	regulation of histone modification (GO:0031056)	01/13	0.222835	IGF2
	central nervous system neuron axonogenesis (GO:0021955)	01/13	0.222835	HSP90AA1
	cytoplasmic sequestering of protein (GO:0051220)	01/13	0.222835	FLNA
	DNA replication-independent nucleosome organization (GO:0034724)	01/13	0.222835	H4-16
	regulation of oxidoreductase activity (GO:0051341)	01/13	0.222835	HP
	entry into host (GO:0044409)	01/13	0.222835	PPIA
	relaxation of cardiac muscle (GO:0055119)	01/13	0.222835	GSN
	Golgi ribbon formation (GO:0090161)	01/13	0.222835	OPTN
	homeostasis of number of cells (GO:0048872)	01/13	0.222835	CARD9
	lipid oxidation (GO:0034440)	01/13	0.222835	ADIPOQ
	macrophage activation involved in immune response (GO:0002281)	01/13	0.222835	LBP
	myelination in peripheral nervous system (GO:0022011)	01/13	0.222835	ADGRG6
	negative regulation of alcohol biosynthetic process (GO:1902931)	01/13	0.222835	APOE
	negative regulation of cell morphogenesis involved in differentiation (GO:0010771)	01/13	0.222835	FBLN1
	negative regulation of endoplasmic reticulum unfolded protein response (GO:1900102)	01/13	0.222835	HSPA5
	negative regulation of intrinsic apoptotic signaling pathway in response to DNA damage by p53 class mediator (GO:1902166)	01/13	0.222835	CD44
	negative regulation of locomotion (GO:0040013)	01/13	0.222835	FBLN1
	negative regulation of nucleocytoplasmic transport (GO:0046823)	01/13	0.222835	APOD
	negative regulation of substrate adhesion-dependent cell spreading (GO:1900025)	01/13	0.222835	FBLN1
	plasma membrane repair (GO:0001778)	01/13	0.222835	MYH9
	plasma membrane tubulation (GO:0097320)	01/13	0.222835	CAVIN2
	positive regulation of adaptive immune response based on somatic recombination of immune receptors built from immunoglobulin superfamily domains (GO:0002824)	01/13	0.222835	CARD9
	positive regulation of calcineurin-mediated signaling (GO:0106058)	01/13	0.222835	IGF1
	positive regulation of calcineurin-NFAT signaling cascade (GO:0070886)	01/13	0.222835	IGF1
	positive regulation of calcium-mediated signaling (GO:0050850)	01/13	0.222835	CDH13
	positive regulation of cell aging (GO:0090343)	01/13	0.222835	B2M
	positive regulation of cellular carbohydrate metabolic process (GO:0010676)	01/13	0.222835	GPLD1
	positive regulation of insulin receptor signaling pathway (GO:0046628)	01/13	0.222835	IGF2
	positive regulation of ruffle assembly (GO:1900029)	01/13	0.222835	PFN1
	positive regulation of vascular endothelial cell proliferation (GO:1905564)	01/13	0.222835	IGF2
	circulatory system development (GO:0072359)	04/126	0.223701	CDH5 - RBP4 - FN1 - HSPG2
	regulation of protein localization to nucleus (GO:1900180)	02/47	0.227984	TFRC - F2
	epidermal growth factor receptor signaling pathway (GO:0007173)	02/47	0.227984	PIGR - EFEMP1
	positive regulation of cell differentiation (GO:0045597)	07/258	0.22857	IGFBP3 - SERPINF2 - IGF1 - APOB - AGT - PF4 - LTF
	regulation of neuron death (GO:1901214)	03/86	0.228845	C1QA - PCSK9 - CLU
	negative regulation of phosphorylation (GO:0042326)	03/86	0.228845	IGFBP3 - FBLN1 - PPIA
	cell-cell adhesion via plasma-membrane adhesion molecules (GO:0098742)	05/170	0.228982	CDH5 - SELL - CDH13 - DSG2 - CELSR2
	regulation of protein metabolic process (GO:0051246)	02/48	0.235093	APOE - CNDP1
	positive regulation of blood vessel endothelial cell migration (GO:0043536)	02/48	0.235093	TMSB4X - THBS1
	positive regulation of macromolecule biosynthetic process (GO:0010557)	04/129	0.236006	IGF2 - IGF1 - EEF2 - THBS1
	regulation of acrosome reaction (GO:0060046)	01/14	0.237767	SERPINA10
	bone morphogenesis (GO:0060349)	01/14	0.237767	LTF
	regulation of chromatin organization (GO:1902275)	01/14	0.237767	IGF2
	cardiolipin metabolic process (GO:0032048)	01/14	0.237767	PNPLA8
	cellular response to low-density lipoprotein particle stimulus (GO:0071404)	01/14	0.237767	CDH13
	ceramide transport (GO:0035627)	01/14	0.237767	PLTP
	regulation of integrin-mediated signaling pathway (GO:2001044)	01/14	0.237767	FLNA
	cGMP-mediated signaling (GO:0019934)	01/14	0.237767	APOE
	regulation of intrinsic apoptotic signaling pathway in response to DNA damage by p53 class mediator (GO:1902165)	01/14	0.237767	CD44
	regulation of IRE1-mediated unfolded protein response (GO:1903894)	01/14	0.237767	HSPA5
	regulation of lamellipodium organization (GO:1902743)	01/14	0.237767	CD44
	regulation of lipase activity (GO:0060191)	01/14	0.237767	APOA2
	cytoplasmic sequestering of transcription factor (GO:0042994)	01/14	0.237767	TMSB4X
	defense response to protozoan (GO:0042832)	01/14	0.237767	PF4
	regulation of response to endoplasmic reticulum stress (GO:1905897)	01/14	0.237767	CLU
	relaxation of muscle (GO:0090075)	01/14	0.237767	GSN
	response to X-ray (GO:0010165)	01/14	0.237767	PRAP1
	immune response-regulating cell surface receptor signaling pathway (GO:0002768)	01/14	0.237767	PIGR
	secretion (GO:0046903)	01/14	0.237767	FBLN5
	microvillus organization (GO:0032528)	01/14	0.237767	RAP1B
	mRNA cleavage involved in mRNA processing (GO:0098787)	01/14	0.237767	ERN1
	ncRNA transcription (GO:0098781)	01/14	0.237767	ANG
	negative regulation of cartilage development (GO:0061037)	01/14	0.237767	EFEMP1
	negative regulation of cell migration involved in sprouting angiogenesis (GO:0090051)	01/14	0.237767	THBS1
	negative regulation of DNA damage response, signal transduction by p53 class mediator (GO:0043518)	01/14	0.237767	CD44
	negative regulation of fibroblast growth factor receptor signaling pathway (GO:0040037)	01/14	0.237767	THBS1
	negative regulation of interleukin-12 production (GO:0032695)	01/14	0.237767	THBS1
	negative regulation of neuroinflammatory response (GO:0150079)	01/14	0.237767	IGF1
	neurotransmitter biosynthetic process (GO:0042136)	01/14	0.237767	DBH
	ovarian follicle development (GO:0001541)	01/14	0.237767	ANG
	positive regulation of cellular response to insulin stimulus (GO:1900078)	01/14	0.237767	IGF2
	positive regulation of glucose metabolic process (GO:0010907)	01/14	0.237767	GPLD1
	positive regulation of glycoprotein biosynthetic process (GO:0010560)	01/14	0.237767	IGF1
	positive regulation of granulocyte macrophage colony-stimulating factor production (GO:0032725)	01/14	0.237767	CARD9
	positive regulation of insulin secretion involved in cellular response to glucose stimulus (GO:0035774)	01/14	0.237767	GPLD1
	positive regulation of macrophage chemotaxis (GO:0010759)	01/14	0.237767	THBS1
	positive regulation of superoxide anion generation (GO:0032930)	01/14	0.237767	CRP
	negative regulation of binding (GO:0051100)	03/88	0.239033	CFHR2 - CFHR1 - CFHR5
	regulation of cellular localization (GO:0060341)	02/49	0.242215	HSP90AA1 - GSN
	regulation of stress-activated MAPK cascade (GO:0032872)	02/49	0.242215	CARD9 - PPIA
	positive regulation of actin filament polymerization (GO:0030838)	02/49	0.242215	GSN - PFN1
	regulation of cysteine-type endopeptidase activity involved in apoptotic process (GO:0043281)	03/89	0.244156	CARD9 - THBS1 - CD44
	collagen fibril organization (GO:0030199)	03/89	0.244156	LUM - SERPINF2 - COL6A3
	cellular response to lipid (GO:0071396)	06/219	0.245627	CD14 - PPBP - LBP - GPLD1 - PF4V1 - PF4
	positive regulation of apoptotic process (GO:0043065)	08/310	0.246887	OBSCN - IGFBP3 - ADIPOQ - PCSK9 - HRG - CLU - GPLD1 - KNG1
	negative regulation of ERK1 and ERK2 cascade (GO:0070373)	02/50	0.249346	ADIPOQ - FBLN1
	regulation of branching involved in ureteric bud morphogenesis (GO:0090189)	01/15	0.252412	AGT
	cardiac myofibril assembly (GO:0055003)	01/15	0.252412	TTN
	catecholamine metabolic process (GO:0006584)	01/15	0.252412	DBH
	regulation of cytoplasmic translation (GO:2000765)	01/15	0.252412	PKM
	cellular response to arsenic-containing substance (GO:0071243)	01/15	0.252412	GSTO1
	cellular response to ATP (GO:0071318)	01/15	0.252412	HSP90B1
	regulation of extracellular matrix disassembly (GO:0010715)	01/15	0.252412	CST3
	regulation of extracellular matrix organization (GO:1903053)	01/15	0.252412	AGT
	central nervous system neuron development (GO:0021954)	01/15	0.252412	HSP90AA1
	regulation of integrin activation (GO:0033623)	01/15	0.252412	RAP1B
	endoplasmic reticulum to cytosol transport (GO:1903513)	01/15	0.252412	HSP90B1
	engulfment of apoptotic cell (GO:0043652)	01/15	0.252412	THBS1
	establishment of spindle localization (GO:0051293)	01/15	0.252412	CFL1
	regulation of secretion (GO:0051046)	01/15	0.252412	GPLD1
	regulation of sequestering of triglyceride (GO:0010889)	01/15	0.252412	APOC4
	regulation of superoxide anion generation (GO:0032928)	01/15	0.252412	CRP
	integrated stress response signaling (GO:0140467)	01/15	0.252412	HSPA5
	macrophage migration (GO:1905517)	01/15	0.252412	SAA1
	microvillus assembly (GO:0030033)	01/15	0.252412	RAP1B
	vitamin D metabolic process (GO:0042359)	01/15	0.252412	GC
	myoblast differentiation (GO:0045445)	01/15	0.252412	IGF1
	negative regulation of blood pressure (GO:0045776)	01/15	0.252412	ADIPOQ
	negative regulation of chondrocyte differentiation (GO:0032331)	01/15	0.252412	EFEMP1
	placenta development (GO:0001890)	01/15	0.252412	ANG
	positive regulation of chromatin organization (GO:1905269)	01/15	0.252412	H4-16
	positive regulation of endothelial cell chemotaxis (GO:2001028)	01/15	0.252412	TMSB4X
	positive regulation of secretion (GO:0051047)	01/15	0.252412	GPLD1
	positive regulation of sprouting angiogenesis (GO:1903672)	01/15	0.252412	PKM
	protein localization to cell-cell junction (GO:0150105)	01/15	0.252412	CDH5
	regulation of cell motility (GO:2000145)	04/133	0.252654	TMSB4X - ENPP2 - FLNA - FBLN1
	positive regulation of supramolecular fiber organization (GO:1902905)	03/91	0.254453	APOE - PFN1 - CLU
	regulation of epithelial cell migration (GO:0010632)	02/51	0.256484	ENPP2 - PFN1
	positive regulation of transmembrane receptor protein serine&&threonine kinase signaling pathway (GO:0090100)	03/92	0.259625	CDH5 - THBS1 - INHBC
	cartilage development (GO:0051216)	02/52	0.263624	CD44 - GPLD1
	regulation of intrinsic apoptotic signaling pathway (GO:2001242)	02/52	0.263624	S100A9 - S100A8
	regulation of release of sequestered calcium ion into cytosol (GO:0051279)	02/52	0.263624	GSTO1 - F2
	negative regulation of protein-containing complex assembly (GO:0031333)	02/52	0.263624	HSPA5 - CLU
	protein homotetramerization (GO:0051289)	02/52	0.263624	ALDOA - B2M
	positive regulation of peptidyl-serine phosphorylation (GO:0033138)	03/93	0.26481	HSP90AA1 - TFRC - CD44
	regulation of blood vessel endothelial cell proliferation involved in sprouting angiogenesis (GO:1903587)	01/16	0.266776	THBS1
	regulation of cellular carbohydrate metabolic process (GO:0010675)	01/16	0.266776	ADIPOQ
	regulation of cholesterol storage (GO:0010885)	01/16	0.266776	APOB
	regulation of ERBB signaling pathway (GO:1901184)	01/16	0.266776	CDH13
	regulation of granulocyte macrophage colony-stimulating factor production (GO:0032645)	01/16	0.266776	CARD9
	cellular response to sterol (GO:0036315)	01/16	0.266776	GPLD1
	regulation of intrinsic apoptotic signaling pathway in response to DNA damage (GO:1902229)	01/16	0.266776	CLU
	regulation of isotype switching (GO:0045191)	01/16	0.266776	TFRC
	regulation of monocyte differentiation (GO:0045655)	01/16	0.266776	APCS
	RNA splicing, via endonucleolytic cleavage and ligation (GO:0000394)	01/16	0.266776	ERN1
	sphingolipid catabolic process (GO:0030149)	01/16	0.266776	ENPP2
	T cell mediated immunity (GO:0002456)	01/16	0.266776	HLA-A
	transepithelial transport (GO:0070633)	01/16	0.266776	GPLD1
	necroptotic process (GO:0070266)	01/16	0.266776	CD14
	negative regulation of natural killer cell mediated cytotoxicity (GO:0045953)	01/16	0.266776	HLA-A
	negative regulation of transcription regulatory region DNA binding (GO:2000678)	01/16	0.266776	TMSB4X
	positive regulation of alpha-beta T cell proliferation (GO:0046641)	01/16	0.266776	HLA-A
	positive regulation of endothelial cell apoptotic process (GO:2000353)	01/16	0.266776	THBS1
	positive regulation of immunoglobulin mediated immune response (GO:0002891)	01/16	0.266776	TFRC
	positive regulation of isotype switching (GO:0045830)	01/16	0.266776	TFRC
	protein localization to endoplasmic reticulum (GO:0070972)	01/16	0.266776	HSPA5
	cardiac muscle tissue development (GO:0048738)	02/53	0.270766	RBP4 - TTN
	positive regulation of chemokine production (GO:0032722)	02/53	0.270766	C5 - ADIPOQ
	striated muscle contraction (GO:0006941)	02/54	0.277905	ALDOA - TTN
	positive regulation of leukocyte chemotaxis (GO:0002690)	02/54	0.277905	F7 - THBS1
	cellular transition metal ion homeostasis (GO:0046916)	03/96	0.280437	TF - TFRC - CP
	purine ribonucleotide transport (GO:0015868)	01/17	0.280865	ABCC4
	regulation of cardiac muscle contraction by regulation of the release of sequestered calcium ion (GO:0010881)	01/17	0.280865	GSTO1
	regulation of cell killing (GO:0031341)	01/17	0.280865	CFH
	regulation of cholesterol biosynthetic process (GO:0045540)	01/17	0.280865	APOE
	cellular biogenic amine biosynthetic process (GO:0042401)	01/17	0.280865	DBH
	DNA biosynthetic process (GO:0071897)	01/17	0.280865	PPIA
	regulation of osteoblast proliferation (GO:0033688)	01/17	0.280865	LTF
	regulation of stem cell proliferation (GO:0072091)	01/17	0.280865	FBLN1
	retrograde protein transport, ER to cytosol (GO:0030970)	01/17	0.280865	HSP90B1
	snRNA metabolic process (GO:0016073)	01/17	0.280865	INTS11
	vasculature development (GO:0001944)	01/17	0.280865	CDH5
	muscle tissue morphogenesis (GO:0060415)	01/17	0.280865	TTN
	negative regulation of ATPase activity (GO:0032780)	01/17	0.280865	LTF
	negative regulation of chemokine production (GO:0032682)	01/17	0.280865	APOD
	negative regulation of intrinsic apoptotic signaling pathway by p53 class mediator (GO:1902254)	01/17	0.280865	CD44
	negative regulation of phagocytosis (GO:0050765)	01/17	0.280865	ADIPOQ
	negative regulation of vascular associated smooth muscle cell proliferation (GO:1904706)	01/17	0.280865	ADIPOQ
	positive regulation of cardiac muscle tissue growth (GO:0055023)	01/17	0.280865	IGF1
	positive regulation of cytokine production involved in inflammatory response (GO:1900017)	01/17	0.280865	CARD9
	cellular response to oxygen-containing compound (GO:1901701)	08/323	0.282144	RAP1B - CD14 - PPBP - LBP - GPLD1 - PF4V1 - PF4 - HSP90B1
	regulation of autophagy (GO:0010506)	06/231	0.284519	EEF1A1 - ERN1 - CSNK2A2 - ITPR1 - GAPDH - OPTN
	regulation of cardiac conduction (GO:1903779)	02/55	0.285039	ITPR1 - AGT
	negative regulation of cysteine-type endopeptidase activity involved in apoptotic process (GO:0043154)	02/55	0.285039	THBS1 - CD44
	negative regulation of cytokine-mediated signaling pathway (GO:0001960)	02/55	0.285039	ADIPOQ - APOA1
	regulation of MAP kinase activity (GO:0043405)	03/97	0.285665	ADIPOQ - APOE - AGT
	glycosaminoglycan biosynthetic process (GO:0006024)	03/97	0.285665	LUM - OMD - HSPG2
	regulation of neuron apoptotic process (GO:0043523)	03/98	0.290901	AGAP2 - PCSK9 - APOE
	regulation of peptidyl-serine phosphorylation (GO:0033135)	03/98	0.290901	HSP90AA1 - TFRC - CD44
	Ras protein signal transduction (GO:0007265)	04/142	0.290905	RAP1B - CFL1 - CDH13 - IGF1
	protein-containing complex disassembly (GO:0032984)	02/56	0.292167	HSPA8 - LAMP2
	Rho protein signal transduction (GO:0007266)	02/56	0.292167	CFL1 - CDH13
	positive regulation of establishment of protein localization to mitochondrion (GO:1903749)	02/56	0.292167	CSNK2A2 - YWHAZ
	positive regulation of interleukin-1 beta production (GO:0032731)	02/56	0.292167	ORM1 - ORM2
	adenine nucleotide transport (GO:0051503)	01/18	0.294684	ABCC4
	amyloid precursor protein metabolic process (GO:0042982)	01/18	0.294684	APOE
	regulation of cellular protein catabolic process (GO:1903362)	01/18	0.294684	HSP90AA1
	regulation of chromosome segregation (GO:0051983)	01/18	0.294684	CSNK2A2
	cell migration involved in sprouting angiogenesis (GO:0002042)	01/18	0.294684	GPLD1
	regulation of fatty acid metabolic process (GO:0019217)	01/18	0.294684	ADIPOQ
	cellular response to pH (GO:0071467)	01/18	0.294684	GPLD1
	regulation of multicellular organism growth (GO:0040014)	01/18	0.294684	IGF1
	regulation of oxidative stress-induced intrinsic apoptotic signaling pathway (GO:1902175)	01/18	0.294684	PPIA
	endothelial cell proliferation (GO:0001935)	01/18	0.294684	ERN1
	regulation of transcription by RNA polymerase I (GO:0006356)	01/18	0.294684	FLNA
	regulation of vascular endothelial cell proliferation (GO:1905562)	01/18	0.294684	IGF2
	release of cytochrome c from mitochondria (GO:0001836)	01/18	0.294684	CLU
	response to axon injury (GO:0048678)	01/18	0.294684	APOD
	hyaluronan catabolic process (GO:0030214)	01/18	0.294684	CD44
	rRNA transcription (GO:0009303)	01/18	0.294684	ANG
	leukocyte tethering or rolling (GO:0050901)	01/18	0.294684	SELL
	negative regulation of interleukin-8 production (GO:0032717)	01/18	0.294684	TMSB4X
	negative regulation of signal transduction by p53 class mediator (GO:1901797)	01/18	0.294684	CD44
	positive regulation of amyloid-beta formation (GO:1902004)	01/18	0.294684	CLU
	positive regulation of cell cycle phase transition (GO:1901989)	01/18	0.294684	CRNN
	positive regulation of mRNA splicing, via spliceosome (GO:0048026)	01/18	0.294684	PRDX6
	positive regulation of myoblast differentiation (GO:0045663)	01/18	0.294684	IGFBP3
	positive regulation of nitric-oxide synthase activity (GO:0051000)	01/18	0.294684	APOE
	positive regulation of response to endoplasmic reticulum stress (GO:1905898)	01/18	0.294684	ERN1
	positive regulation of stress-activated protein kinase signaling cascade (GO:0070304)	01/18	0.294684	CARD9
	programmed necrotic cell death (GO:0097300)	01/18	0.294684	CD14
	nitrogen compound transport (GO:0071705)	04/143	0.295207	HBB - MYH9 - HRG - HSP90B1
	arachidonic acid metabolic process (GO:0019369)	02/57	0.299285	PNPLA8 - PTGDS
	regulation of bone mineralization (GO:0030500)	02/57	0.299285	ECM1 - AHSG
	regulation of mitotic nuclear division (GO:0007088)	02/57	0.299285	IGF2 - IGF1
	positive regulation of interferon-gamma production (GO:0032729)	02/57	0.299285	HLA-A - CD14
	positive regulation of proteolysis (GO:0045862)	02/57	0.299285	APOE - GPLD1
	positive regulation of translation (GO:0045727)	03/100	0.301393	PKM - EEF2 - THBS1
	chordate embryonic development (GO:0043009)	02/58	0.306391	RBP4 - IGF2
	eye development (GO:0001654)	02/58	0.306391	RBP4 - EFEMP1
	regulation of tumor necrosis factor-mediated signaling pathway (GO:0010803)	02/58	0.306391	ADIPOQ - APOA1
	muscle organ development (GO:0007517)	02/58	0.306391	COL6A3 - IGF1
	actin filament capping (GO:0051693)	01/19	0.308239	GSN
	Rac protein signal transduction (GO:0016601)	01/19	0.308239	CDH13
	regulation of autophagy of mitochondrion (GO:1903146)	01/19	0.308239	CSNK2A2
	barbed-end actin filament capping (GO:0051016)	01/19	0.308239	GSN
	cardiac muscle cell contraction (GO:0086003)	01/19	0.308239	GSN
	regulation of glucose transmembrane transport (GO:0010827)	01/19	0.308239	C3
	detection of mechanical stimulus (GO:0050982)	01/19	0.308239	TTN
	regulation of neuroinflammatory response (GO:0150077)	01/19	0.308239	IGF1
	diol metabolic process (GO:0034311)	01/19	0.308239	HSP90AA1
	dopamine metabolic process (GO:0042417)	01/19	0.308239	DBH
	regulation of synaptic vesicle exocytosis (GO:2000300)	01/19	0.308239	RAP1B
	regulation of vascular endothelial growth factor signaling pathway (GO:1900746)	01/19	0.308239	HRG
	glycerolipid catabolic process (GO:0046503)	01/19	0.308239	PRDX6
	response to ATP (GO:0033198)	01/19	0.308239	HSP90B1
	response to cholesterol (GO:0070723)	01/19	0.308239	GPLD1
	leukocyte adhesion to vascular endothelial cell (GO:0061756)	01/19	0.308239	SELL
	long-term memory (GO:0007616)	01/19	0.308239	APOE
	synaptic transmission, cholinergic (GO:0007271)	01/19	0.308239	APOE
	maintenance of protein localization in organelle (GO:0072595)	01/19	0.308239	HSPA5
	telomere capping (GO:0016233)	01/19	0.308239	H4-16
	mitochondrion localization (GO:0051646)	01/19	0.308239	ALB
	myeloid cell activation involved in immune response (GO:0002275)	01/19	0.308239	LBP
	negative regulation of immune system process (GO:0002683)	01/19	0.308239	AMBP
	negative regulation of nervous system development (GO:0051961)	01/19	0.308239	B2M
	negative regulation of oxidative stress-induced intrinsic apoptotic signaling pathway (GO:1902176)	01/19	0.308239	PPIA
	negative regulation of protein localization to nucleus (GO:1900181)	01/19	0.308239	APOD
	negative regulation of RNA metabolic process (GO:0051253)	01/19	0.308239	FCN3
	positive regulation of focal adhesion assembly (GO:0051894)	01/19	0.308239	HRG
	positive regulation of macrophage migration (GO:1905523)	01/19	0.308239	THBS1
	positive regulation of oxidoreductase activity (GO:0051353)	01/19	0.308239	AGT
	postsynaptic membrane organization (GO:0001941)	01/19	0.308239	APOE
	mitotic sister chromatid segregation (GO:0000070)	03/102	0.311903	CSNK2A2 - H4-16 - TTN
	positive regulation of vasculature development (GO:1904018)	03/102	0.311903	CDH5 - ECM1 - THBS1
	apical junction assembly (GO:0043297)	02/60	0.320561	CDH5 - VCL
	base-excision repair, AP site formation (GO:0006285)	01/20	0.321533	H4-16
	regulation of fibroblast growth factor receptor signaling pathway (GO:0040036)	01/20	0.321533	THBS1
	regulation of granulocyte chemotaxis (GO:0071622)	01/20	0.321533	THBS1
	cortical actin cytoskeleton organization (GO:0030866)	01/20	0.321533	LCP1
	regulation of programmed necrotic cell death (GO:0062098)	01/20	0.321533	HSP90AA1
	regulation of protein kinase A signaling (GO:0010738)	01/20	0.321533	ADIPOQ
	regulation of protein modification by small protein conjugation or removal (GO:1903320)	01/20	0.321533	HSP90AA1
	eye morphogenesis (GO:0048592)	01/20	0.321533	EFEMP1
	fatty acid transport (GO:0015908)	01/20	0.321533	APOE
	regulation of T cell migration (GO:2000404)	01/20	0.321533	APOD
	regulation of tissue remodeling (GO:0034103)	01/20	0.321533	CST3
	glucose transmembrane transport (GO:1904659)	01/20	0.321533	PPBP
	hepaticobiliary system development (GO:0061008)	01/20	0.321533	PCSK9
	natural killer cell mediated immunity (GO:0002228)	01/20	0.321533	TUBB4B
	negative regulation of lipid storage (GO:0010888)	01/20	0.321533	CRP
	negative regulation of osteoclast differentiation (GO:0045671)	01/20	0.321533	LTF
	positive regulation of alpha-beta T cell activation (GO:0046635)	01/20	0.321533	HLA-A
	positive regulation of dendrite morphogenesis (GO:0050775)	01/20	0.321533	CDKL3
	positive regulation of embryonic development (GO:0040019)	01/20	0.321533	CFL1
	regulation of endocytosis (GO:0030100)	02/61	0.327619	CDH13 - APOE
	regulation of JNK cascade (GO:0046328)	03/105	0.327684	AMBP - SERPINF2 - CARD9
	negative regulation of protein phosphorylation (GO:0001933)	04/152	0.334219	IGFBP3 - ADIPOQ - FBLN1 - PPIA
	purinergic nucleotide receptor signaling pathway (GO:0035590)	01/21	0.334573	C3
	autonomic nervous system development (GO:0048483)	01/21	0.334573	FN1
	regulation of cardiac muscle cell proliferation (GO:0060043)	01/21	0.334573	RBP4
	regulation of cardiac muscle contraction by calcium ion signaling (GO:0010882)	01/21	0.334573	GSTO1
	regulation of cell-substrate junction assembly (GO:0090109)	01/21	0.334573	VCL
	regulation of cholesterol metabolic process (GO:0090181)	01/21	0.334573	APOE
	regulation of dendritic spine development (GO:0060998)	01/21	0.334573	APOE
	regulation of fibroblast migration (GO:0010762)	01/21	0.334573	THBS1
	regulation of lipopolysaccharide-mediated signaling pathway (GO:0031664)	01/21	0.334573	LTF
	focal adhesion assembly (GO:0048041)	01/21	0.334573	ACTN1
	response to progesterone (GO:0032570)	01/21	0.334573	THBS1
	retinol metabolic process (GO:0042572)	01/21	0.334573	RBP4
	linoleic acid metabolic process (GO:0043651)	01/21	0.334573	PNPLA8
	myotube differentiation (GO:0014902)	01/21	0.334573	IGF1
	negative regulation of ion transmembrane transporter activity (GO:0032413)	01/21	0.334573	PCSK9
	negative regulation of reproductive process (GO:2000242)	01/21	0.334573	IGF1
	negative regulation of response to wounding (GO:1903035)	01/21	0.334573	APCS
	neuron apoptotic process (GO:0051402)	01/21	0.334573	GAPDH
	positive regulation of glycolytic process (GO:0045821)	01/21	0.334573	IGF1
	positive regulation of phosphatase activity (GO:0010922)	01/21	0.334573	GPLD1
	positive regulation of purine nucleotide metabolic process (GO:1900544)	01/21	0.334573	IGF1
	positive regulation of transcription regulatory region DNA binding (GO:2000679)	01/21	0.334573	IGF1
	regulation of neurogenesis (GO:0050767)	02/62	0.334658	SERPINF1 - B2M
	COPII vesicle coating (GO:0048208)	02/63	0.341675	SERPINA1 - F5
	vesicle coating (GO:0006901)	02/63	0.341675	SERPINA1 - F5
	vesicle targeting, rough ER to cis-Golgi (GO:0048207)	02/63	0.341675	SERPINA1 - F5
	positive regulation of Ras protein signal transduction (GO:0046579)	02/63	0.341675	APOA1 - IGF1
	regulation of cardiac muscle cell membrane repolarization (GO:0099623)	01/22	0.347362	FLNA
	cell projection assembly (GO:0030031)	01/22	0.347362	GSN
	regulation of DNA recombination at telomere (GO:0072695)	01/22	0.347362	H4-16
	regulation of response to cytokine stimulus (GO:0060759)	01/22	0.347362	APOA1
	female gonad development (GO:0008585)	01/22	0.347362	ANG
	regulation of vacuole organization (GO:0044088)	01/22	0.347362	ENO1
	glutathione derivative biosynthetic process (GO:1901687)	01/22	0.347362	GSTO1
	glutathione derivative metabolic process (GO:1901685)	01/22	0.347362	GSTO1
	heme biosynthetic process (GO:0006783)	01/22	0.347362	ALB
	lipid droplet organization (GO:0034389)	01/22	0.347362	PPIA
	natural killer cell mediated cytotoxicity (GO:0042267)	01/22	0.347362	TUBB4B
	negative regulation of DNA recombination at telomere (GO:0048239)	01/22	0.347362	H4-16
	positive regulation of amyloid precursor protein catabolic process (GO:1902993)	01/22	0.347362	CLU
	positive regulation of calcium ion transmembrane transporter activity (GO:1901021)	01/22	0.347362	GSTO1
	positive regulation of dendritic spine development (GO:0060999)	01/22	0.347362	APOE
	plasma membrane organization (GO:0007009)	02/64	0.348669	CAVIN2 - MYH9
	regulation of interleukin-6 production (GO:0032675)	03/110	0.353963	ORM1 - CARD9 - LBP
	regulation of protein kinase activity (GO:0045859)	03/110	0.353963	AGAP2 - PPIA - TTN
	acylglycerol biosynthetic process (GO:0046463)	01/23	0.359907	ANG
	regulation of cysteine-type endopeptidase activity (GO:2000116)	01/23	0.359907	LTF
	cytoskeleton-dependent intracellular transport (GO:0030705)	01/23	0.359907	TUBA1B
	regulation of mononuclear cell migration (GO:0071675)	01/23	0.359907	THBS1
	regulation of necroptotic process (GO:0060544)	01/23	0.359907	HSP90AA1
	regulation of release of sequestered calcium ion into cytosol by sarcoplasmic reticulum (GO:0010880)	01/23	0.359907	GSTO1
	regulation of steroid metabolic process (GO:0019218)	01/23	0.359907	APOE
	hexose transmembrane transport (GO:0008645)	01/23	0.359907	PPBP
	hyaluronan metabolic process (GO:0030212)	01/23	0.359907	CD44
	membrane protein ectodomain proteolysis (GO:0006509)	01/23	0.359907	MYH9
	triglyceride catabolic process (GO:0019433)	01/23	0.359907	APOC3
	negative regulation of extrinsic apoptotic signaling pathway in absence of ligand (GO:2001240)	01/23	0.359907	PF4
	negative regulation of signal transduction in absence of ligand (GO:1901099)	01/23	0.359907	PF4
	positive regulation of interleukin-17 production (GO:0032740)	01/23	0.359907	CARD9
	positive regulation of morphogenesis of an epithelium (GO:1905332)	01/23	0.359907	AGT
	positive regulation of mRNA processing (GO:0050685)	01/23	0.359907	PRDX6
	positive regulation of receptor internalization (GO:0002092)	01/23	0.359907	PCSK9
	cellular response to growth factor stimulus (GO:0071363)	04/158	0.360373	EEF1A1 - ERN1 - CLEC3B - CD44
	protein-containing complex subunit organization (GO:0043933)	03/112	0.364444	FGA - IL1RAP - JCHAIN
	regulation of cytoskeleton organization (GO:0051493)	03/112	0.364444	HRG - S100A9 - S100A8
	regulation of macroautophagy (GO:0016241)	03/112	0.364444	ERN1 - QSOX1 - GAPDH
	regulation of protein kinase B signaling (GO:0051896)	05/207	0.366058	F7 - HSP90AA1 - F10 - IGF2 - THBS1
	regulation of epidermal growth factor receptor signaling pathway (GO:0042058)	02/67	0.369493	CDH13 - AGT
	regulation of viral genome replication (GO:0045069)	02/67	0.369493	PPIA - LTF
	sulfur compound biosynthetic process (GO:0044272)	03/113	0.369675	GSTO1 - LUM - OMD
	positive regulation of metabolic process (GO:0009893)	03/113	0.369675	ADIPOQ - DBH - JCHAIN
	axon extension (GO:0048675)	01/24	0.372211	HSP90AA1
	cardiac muscle cell development (GO:0055013)	01/24	0.372211	TTN
	cardiac muscle cell differentiation (GO:0055007)	01/24	0.372211	TTN
	regulation of keratinocyte proliferation (GO:0010837)	01/24	0.372211	CRNN
	regulation of monooxygenase activity (GO:0032768)	01/24	0.372211	HSP90AA1
	regulation of ruffle assembly (GO:1900027)	01/24	0.372211	PFN1
	regulation of vascular endothelial growth factor receptor signaling pathway (GO:0030947)	01/24	0.372211	VTN
	heterochromatin assembly (GO:0031507)	01/24	0.372211	H4-16
	immune response-activating cell surface receptor signaling pathway (GO:0002429)	01/24	0.372211	GPLD1
	lymphocyte activation involved in immune response (GO:0002285)	01/24	0.372211	LCP1
	negative regulation of neuron differentiation (GO:0045665)	01/24	0.372211	B2M
	negative regulation of NIK&&NF-kappaB signaling (GO:1901223)	01/24	0.372211	TMSB4X
	negative regulation of stress fiber assembly (GO:0051497)	01/24	0.372211	PFN1
	negative regulation of synaptic transmission (GO:0050805)	01/24	0.372211	ADIPOQ
	porphyrin-containing compound biosynthetic process (GO:0006779)	01/24	0.372211	ALB
	positive regulation of carbohydrate metabolic process (GO:0045913)	01/24	0.372211	IGF1
	positive regulation of cell-substrate junction organization (GO:0150117)	01/24	0.372211	HRG
	positive regulation of cellular response to transforming growth factor beta stimulus (GO:1903846)	01/24	0.372211	THBS1
	positive regulation of neuron apoptotic process (GO:0043525)	01/24	0.372211	PCSK9
	positive regulation of phospholipase activity (GO:0010518)	01/24	0.372211	APOC2
	positive regulation of transcription from RNA polymerase II promoter in response to stress (GO:0036003)	01/24	0.372211	HSPA5
	positive regulation of transforming growth factor beta receptor signaling pathway (GO:0030511)	01/24	0.372211	THBS1
	protein exit from endoplasmic reticulum (GO:0032527)	01/24	0.372211	HSP90B1
	protein insertion into mitochondrial membrane (GO:0051204)	01/24	0.372211	HSP90AA1
	protein kinase B signaling (GO:0043491)	01/24	0.372211	IGF1
	activation of protein kinase activity (GO:0032147)	03/114	0.374897	ANG - IGF1 - PPIA
	cellular response to transforming growth factor beta stimulus (GO:0071560)	03/114	0.374897	CDH5 - CLEC3B - APOA1
	negative regulation of cell motility (GO:2000146)	03/114	0.374897	ADIPOQ - FBLN1 - VCL
	positive regulation of protein polymerization (GO:0032273)	02/69	0.38323	HSP90AA1 - PFN1
	receptor catabolic process (GO:0032801)	01/25	0.384279	PCSK9
	regulation of cardiac muscle cell action potential (GO:0098901)	01/25	0.384279	DSG2
	cAMP-mediated signaling (GO:0019933)	01/25	0.384279	ADGRG6
	cellular response to hexose stimulus (GO:0071331)	01/25	0.384279	ERN1
	regulation of proteolysis involved in cellular protein catabolic process (GO:1903050)	01/25	0.384279	APOE
	regulation of ryanodine-sensitive calcium-release channel activity (GO:0060314)	01/25	0.384279	GSTO1
	fat-soluble vitamin metabolic process (GO:0006775)	01/25	0.384279	GC
	in utero embryonic development (GO:0001701)	01/25	0.384279	IGF2
	ventricular cardiac muscle tissue development (GO:0003229)	01/25	0.384279	DSG2
	negative regulation of response to endoplasmic reticulum stress (GO:1903573)	01/25	0.384279	CLU
	negative regulation of sequestering of calcium ion (GO:0051283)	01/25	0.384279	ITPR1
	organophosphate ester transport (GO:0015748)	01/25	0.384279	PLTP
	peptide catabolic process (GO:0043171)	01/25	0.384279	ADAMTS13
	peripheral nervous system development (GO:0007422)	01/25	0.384279	ADGRG6
	phosphatidylglycerol metabolic process (GO:0046471)	01/25	0.384279	PNPLA8
	positive regulation of ERBB signaling pathway (GO:1901186)	01/25	0.384279	AGT
	carbohydrate homeostasis (GO:0033500)	02/70	0.39005	RBP4 - ADIPOQ
	COPII-coated vesicle budding (GO:0090114)	02/70	0.39005	SERPINA1 - F5
	kidney development (GO:0001822)	02/70	0.39005	PCSK9 - AGT
	wound healing (GO:0042060)	02/70	0.39005	MYH9 - IGF1
	positive regulation of cell projection organization (GO:0031346)	03/117	0.390511	CDKL3 - APOE - S100A9
	regulation of MAPK cascade (GO:0043408)	04/166	0.395185	FN1 - IGF2 - IGF1 - YWHAZ
	proteoglycan metabolic process (GO:0006029)	01/26	0.396115	IGF1
	regulation of actin filament bundle assembly (GO:0032231)	01/26	0.396115	PFN1
	regulation of chondrocyte differentiation (GO:0032330)	01/26	0.396115	EFEMP1
	DNA modification (GO:0006304)	01/26	0.396115	H4-16
	regulation of protein insertion into mitochondrial membrane involved in apoptotic signaling pathway (GO:1900739)	01/26	0.396115	YWHAZ
	endothelial cell development (GO:0001885)	01/26	0.396115	RAP1B
	regulation of synapse organization (GO:0050807)	01/26	0.396115	YWHAZ
	glial cell development (GO:0021782)	01/26	0.396115	S100A9
	regulation of viral life cycle (GO:1903900)	01/26	0.396115	PPIA
	snRNA processing (GO:0016180)	01/26	0.396115	INTS11
	mononuclear cell differentiation (GO:1903131)	01/26	0.396115	MYH9
	negative regulation of macroautophagy (GO:0016242)	01/26	0.396115	QSOX1
	negative regulation of proteolysis involved in cellular protein catabolic process (GO:1903051)	01/26	0.396115	CSNK2A2
	phosphatidylethanolamine acyl-chain remodeling (GO:0036152)	01/26	0.396115	PNPLA8
	positive regulation of protein insertion into mitochondrial membrane involved in apoptotic signaling pathway (GO:1900740)	01/26	0.396115	YWHAZ
	protein tetramerization (GO:0051262)	02/71	0.396837	ALDOA - B2M
	Fc-gamma receptor signaling pathway involved in phagocytosis (GO:0038096)	02/71	0.396837	FCGR3A - HSP90AA1
	negative regulation of neuron apoptotic process (GO:0043524)	02/71	0.396837	AGAP2 - APOE
	positive regulation of cellular protein localization (GO:1903829)	02/71	0.396837	TFRC - F2
	cell junction organization (GO:0034330)	02/72	0.403588	C1QA - FLNA
	Fc-gamma receptor signaling pathway (GO:0038094)	02/72	0.403588	FCGR3A - HSP90AA1
	positive regulation of neurogenesis (GO:0050769)	02/72	0.403588	CDKL3 - SERPINF1
	protein peptidyl-prolyl isomerization (GO:0000413)	01/27	0.407725	PPIA
	regulation of cardiac muscle cell contraction (GO:0086004)	01/27	0.407725	DSG2
	regulation of cell junction assembly (GO:1901888)	01/27	0.407725	RAP1B
	camera-type eye development (GO:0043010)	01/27	0.407725	EFEMP1
	regulation of transcription regulatory region DNA binding (GO:2000677)	01/27	0.407725	IGF1
	release of sequestered calcium ion into cytosol (GO:0051209)	01/27	0.407725	ITPR1
	negative regulation of actin filament bundle assembly (GO:0032232)	01/27	0.407725	PFN1
	negative regulation of cation channel activity (GO:2001258)	01/27	0.407725	GSTO1
	negative regulation of insulin receptor signaling pathway (GO:0046627)	01/27	0.407725	AHSG
	negative regulation of plasma membrane bounded cell projection assembly (GO:0120033)	01/27	0.407725	HRG
	positive regulation of BMP signaling pathway (GO:0030513)	01/27	0.407725	CDH5
	positive regulation of calcium ion transmembrane transport (GO:1904427)	01/27	0.407725	F2
	positive regulation of striated muscle cell differentiation (GO:0051155)	01/27	0.407725	IGF1
	central nervous system development (GO:0007417)	06/268	0.40996	C3 - C1QA - BTD - GSN - APOD - HSPG2
	antigen processing and presentation of exogenous peptide antigen via MHC class I, TAP-dependent (GO:0002479)	02/73	0.410303	HLA-A - B2M
	regulation of hydrolase activity (GO:0051336)	02/73	0.410303	APOA1 - SERPINA5
	insulin receptor signaling pathway (GO:0008286)	02/73	0.410303	IGF2 - GPLD1
	ubiquitin-dependent ERAD pathway (GO:0030433)	02/73	0.410303	HSPA5 - HSP90B1
	positive regulation of JNK cascade (GO:0046330)	02/73	0.410303	SERPINF2 - CARD9
	Fc receptor mediated stimulatory signaling pathway (GO:0002431)	02/74	0.416981	FCGR3A - HSP90AA1
	amide transport (GO:0042886)	01/28	0.419112	PLTP
	regulation of calcineurin-NFAT signaling cascade (GO:0070884)	01/28	0.419112	IGF1
	bile acid and bile salt transport (GO:0015721)	01/28	0.419112	ABCC4
	regulation of DNA damage response, signal transduction by p53 class mediator (GO:0043516)	01/28	0.419112	CD44
	cellular response to epidermal growth factor stimulus (GO:0071364)	01/28	0.419112	EEF1A1
	regulation of extrinsic apoptotic signaling pathway in absence of ligand (GO:2001239)	01/28	0.419112	PF4
	regulation of immunoglobulin production (GO:0002637)	01/28	0.419112	RBP4
	regulation of insulin secretion involved in cellular response to glucose stimulus (GO:0061178)	01/28	0.419112	GPLD1
	regulation of muscle contraction (GO:0006937)	01/28	0.419112	ENO1
	regulation of phosphatase activity (GO:0010921)	01/28	0.419112	HSP90B1
	regulation of postsynapse organization (GO:0099175)	01/28	0.419112	CFL1
	GPI anchor metabolic process (GO:0006505)	01/28	0.419112	GPLD1
	response to ketone (GO:1901654)	01/28	0.419112	THBS1
	RNA phosphodiester bond hydrolysis (GO:0090501)	01/28	0.419112	ERN1
	T cell activation involved in immune response (GO:0002286)	01/28	0.419112	LCP1
	negative regulation of axonogenesis (GO:0050771)	01/28	0.419112	CDKL3
	negative regulation of calcium ion transmembrane transporter activity (GO:1901020)	01/28	0.419112	GSTO1
	negative regulation of cellular response to insulin stimulus (GO:1900077)	01/28	0.419112	AHSG
	negative regulation of oxidative stress-induced cell death (GO:1903202)	01/28	0.419112	PPIA
	positive regulation of cell communication (GO:0010647)	01/28	0.419112	ADIPOQ
	positive regulation of defense response to virus by host (GO:0002230)	01/28	0.419112	HSP90AA1
	positive regulation of monooxygenase activity (GO:0032770)	01/28	0.419112	APOE
	positive regulation of phosphatidylinositol 3-kinase activity (GO:0043552)	01/28	0.419112	AGAP2
	positive regulation of protein import into nucleus (GO:0042307)	01/28	0.419112	FLNA
	positive regulation of response to wounding (GO:1903036)	01/28	0.419112	VTN
	positive regulation of synapse assembly (GO:0051965)	01/28	0.419112	IL1RAP
	protein localization to Golgi apparatus (GO:0034067)	01/28	0.419112	OPTN
	positive regulation of T cell activation (GO:0050870)	02/75	0.423621	TFRC - HLA-A
	cell morphogenesis involved in neuron differentiation (GO:0048667)	02/76	0.430222	ACTBL2 - CELSR2
	chloride transport (GO:0006821)	02/76	0.430222	SLC4A1 - APOL1
	water-soluble vitamin metabolic process (GO:0006767)	02/76	0.430222	BTD - GSTO1
	positive regulation of interleukin-6 production (GO:0032755)	02/76	0.430222	CARD9 - LBP
	regulation of actin polymerization or depolymerization (GO:0008064)	01/29	0.430281	PFN1
	regulation of DNA biosynthetic process (GO:2000278)	01/29	0.430281	ADIPOQ
	regulation of neuronal synaptic plasticity (GO:0048168)	01/29	0.430281	APOE
	establishment of endothelial barrier (GO:0061028)	01/29	0.430281	RAP1B
	glial cell differentiation (GO:0010001)	01/29	0.430281	ADGRG6
	limb development (GO:0060173)	01/29	0.430281	COMP
	lipid catabolic process (GO:0016042)	01/29	0.430281	APOA4
	telomere maintenance via telomerase (GO:0007004)	01/29	0.430281	HSP90AA1
	MyD88-dependent toll-like receptor signaling pathway (GO:0002755)	01/29	0.430281	CD14
	negative regulation of epithelial to mesenchymal transition (GO:0010719)	01/29	0.430281	VASN
	positive regulation of leukocyte migration (GO:0002687)	01/29	0.430281	F7
	positive regulation of viral genome replication (GO:0045070)	01/29	0.430281	PPIA
	synapse organization (GO:0050808)	03/126	0.436687	C1QB - C1QA - C1QC
	negative regulation of cell growth (GO:0030308)	03/126	0.436687	CDKL3 - ENO1 - HRG
	negative regulation of developmental process (GO:0051093)	02/77	0.436782	CST3 - TFRC
	cell projection organization (GO:0030030)	01/30	0.441235	GSN
	CENP-A containing chromatin organization (GO:0061641)	01/30	0.441235	H4-16
	CENP-A containing nucleosome assembly (GO:0034080)	01/30	0.441235	H4-16
	regulation of long-term synaptic potentiation (GO:1900271)	01/30	0.441235	APOE
	regulation of protein localization to membrane (GO:1905475)	01/30	0.441235	GSN
	respiratory tube development (GO:0030323)	01/30	0.441235	RBP4
	Golgi to plasma membrane protein transport (GO:0043001)	01/30	0.441235	OPTN
	heterotypic cell-cell adhesion (GO:0034113)	01/30	0.441235	DSG2
	ion homeostasis (GO:0050801)	01/30	0.441235	SLC4A1
	TRIF-dependent toll-like receptor signaling pathway (GO:0035666)	01/30	0.441235	CD14
	morphogenesis of an epithelium (GO:0002009)	01/30	0.441235	VCL
	negative regulation of cytoskeleton organization (GO:0051494)	01/30	0.441235	PFN1
	negative regulation of gene expression, epigenetic (GO:0045814)	01/30	0.441235	H4-16
	phosphatidylcholine acyl-chain remodeling (GO:0036151)	01/30	0.441235	PNPLA8
	positive regulation of B cell proliferation (GO:0030890)	01/30	0.441235	TFRC
	positive regulation of DNA recombination (GO:0045911)	01/30	0.441235	TFRC
	positive regulation of lipid kinase activity (GO:0090218)	01/30	0.441235	F2
	positive regulation of protein import (GO:1904591)	01/30	0.441235	FLNA
	positive regulation of small GTPase mediated signal transduction (GO:0051057)	01/30	0.441235	IGF1
	glycerophospholipid biosynthetic process (GO:0046474)	04/177	0.442506	CSNK2A2 - APOA2 - APOA1 - LCAT
	antigen processing and presentation of exogenous peptide antigen via MHC class I (GO:0042590)	02/78	0.443301	HLA-A - B2M
	plasma membrane bounded cell projection assembly (GO:0120031)	06/278	0.444014	RAP1B - ABCC4 - GSN - FLNA - CDH13 - VCL
	negative regulation of immune response (GO:0050777)	04/178	0.446758	CD163 - FCGR3A - AMBP - MYH9
	regulation of cellular response to heat (GO:1900034)	02/79	0.449778	HSPA8 - HSP90AA1
	proteoglycan biosynthetic process (GO:0030166)	01/31	0.451979	IGF1
	aminoglycan catabolic process (GO:0006026)	01/31	0.451979	HSPG2
	regulation of cellular senescence (GO:2000772)	01/31	0.451979	B2M
	cellular response to cAMP (GO:0071320)	01/31	0.451979	RAP1B
	MyD88-independent toll-like receptor signaling pathway (GO:0002756)	01/31	0.451979	CD14
	negative regulation of axon extension (GO:0030517)	01/31	0.451979	CDKL3
	negative regulation of interleukin-6 production (GO:0032715)	01/31	0.451979	ORM1
	negative regulation of response to biotic stimulus (GO:0002832)	01/31	0.451979	LTF
	phosphatidylethanolamine metabolic process (GO:0046337)	01/31	0.451979	PNPLA8
	positive regulation of leukocyte cell-cell adhesion (GO:1903039)	01/31	0.451979	CD44
	positive regulation of locomotion (GO:0040017)	01/31	0.451979	THBS1
	positive regulation of protein targeting to mitochondrion (GO:1903955)	01/31	0.451979	CSNK2A2
	positive regulation of proteolysis involved in cellular protein catabolic process (GO:1903052)	01/31	0.451979	CLU
	positive regulation of Rho protein signal transduction (GO:0035025)	01/31	0.451979	APOA1
	regulation of NIK&&NF-kappaB signaling (GO:1901222)	02/80	0.456213	TMSB4X - CD14
	regulation of organelle organization (GO:0033043)	02/80	0.456213	S100A9 - S100A8
	negative regulation of cellular response to growth factor stimulus (GO:0090288)	02/80	0.456213	THBS1 - AGT
	positive regulation of cell adhesion (GO:0045785)	02/80	0.456213	SAA1 - PRSS2
	G2&&M transition of mitotic cell cycle (GO:0000086)	03/130	0.456795	HSP90AA1 - TUBB4B - OPTN
	cell cycle G2&&M phase transition (GO:0044839)	03/131	0.461776	HSP90AA1 - TUBB4B - OPTN
	cellular response to metal ion (GO:0071248)	03/131	0.461776	TF - B2M - GPLD1
	activation of phospholipase C activity (GO:0007202)	01/32	0.462518	ANG
	regulation of cell migration involved in sprouting angiogenesis (GO:0090049)	01/32	0.462518	THBS1
	regulation of chemotaxis (GO:0050920)	01/32	0.462518	THBS1
	cardiac muscle tissue morphogenesis (GO:0055008)	01/32	0.462518	TTN
	regulation of dendrite morphogenesis (GO:0048814)	01/32	0.462518	CDKL3
	regulation of dendritic spine morphogenesis (GO:0061001)	01/32	0.462518	CFL1
	cellular response to glucose stimulus (GO:0071333)	01/32	0.462518	ERN1
	chondrocyte differentiation (GO:0002062)	01/32	0.462518	GPLD1
	chromatin remodeling at centromere (GO:0031055)	01/32	0.462518	H4-16
	ERBB2 signaling pathway (GO:0038128)	01/32	0.462518	HSP90AA1
	skeletal muscle organ development (GO:0060538)	01/32	0.462518	MYL6
	liver development (GO:0001889)	01/32	0.462518	PCSK9
	long-chain fatty acid transport (GO:0015909)	01/32	0.462518	APOE
	modulation by host of symbiont process (GO:0051851)	01/32	0.462518	CARD9
	negative regulation of developmental growth (GO:0048640)	01/32	0.462518	CDKL3
	negative regulation of DNA biosynthetic process (GO:2000279)	01/32	0.462518	ADIPOQ
	negative regulation of microtubule polymerization or depolymerization (GO:0031111)	01/32	0.462518	CDH5
	peptidyl-proline modification (GO:0018208)	01/32	0.462518	PPIA
	positive regulation of immune effector process (GO:0002699)	01/32	0.462518	LBP
	positive regulation of lamellipodium organization (GO:1902745)	01/32	0.462518	ENPP2
	positive regulation of receptor signaling pathway via STAT (GO:1904894)	01/32	0.462518	F2
	activation of cysteine-type endopeptidase activity involved in apoptotic process (GO:0006919)	02/81	0.462604	S100A9 - S100A8
	regulation of gene expression, epigenetic (GO:0040029)	02/82	0.46895	H4-16 - IGF2
	positive regulation of programmed cell death (GO:0043068)	06/286	0.470975	OBSCN - IGFBP3 - HRG - CLU - GPLD1 - KNG1
	actin filament bundle organization (GO:0061572)	01/33	0.472854	LCP1
	apoptotic mitochondrial changes (GO:0008637)	01/33	0.472854	CLU
	regulation of interleukin-17 production (GO:0032660)	01/33	0.472854	CARD9
	negative chemotaxis (GO:0050919)	01/33	0.472854	APOA1
	negative regulation of JNK cascade (GO:0046329)	01/33	0.472854	AMBP
	positive regulation of receptor signaling pathway via JAK-STAT (GO:0046427)	01/33	0.472854	F2
	regulation of osteoblast differentiation (GO:0045667)	02/83	0.475252	IGF1 - LTF
	peptide metabolic process (GO:0006518)	02/83	0.475252	ADAMTS13 - CPN1
	vascular transport (GO:0010232)	02/84	0.481508	ABCC4 - TFRC
	autophagosome maturation (GO:0097352)	01/34	0.482992	LAMP2
	cellular response to vascular endothelial growth factor stimulus (GO:0035924)	01/34	0.482992	ERN1
	regulation of lamellipodium assembly (GO:0010591)	01/34	0.482992	HRG
	regulation of myoblast differentiation (GO:0045661)	01/34	0.482992	IGFBP3
	response to steroid hormone (GO:0048545)	01/34	0.482992	THBS1
	phosphatidylinositol 3-kinase signaling (GO:0014065)	01/34	0.482992	IGF1
	positive regulation of calcium ion transport into cytosol (GO:0010524)	01/34	0.482992	F2
	positive regulation of DNA binding (GO:0043388)	01/34	0.482992	IGF1
	positive regulation of epidermal growth factor receptor signaling pathway (GO:0045742)	01/34	0.482992	AGT
	positive regulation of mitochondrial outer membrane permeabilization involved in apoptotic signaling pathway (GO:1901030)	01/34	0.482992	YWHAZ
	positive regulation of telomerase activity (GO:0051973)	01/34	0.482992	HSP90AA1
	protein destabilization (GO:0031648)	01/34	0.482992	GSN
	negative regulation of inflammatory response to antigenic stimulus (GO:0002862)	03/136	0.486371	CD163 - FCGR3A - MYH9
	regulation of cell cycle G2&&M phase transition (GO:1902749)	02/85	0.487719	HSP90AA1 - TUBB4B
	Wnt signaling pathway, planar cell polarity pathway (GO:0060071)	02/85	0.487719	PFN1 - CELSR2
	regulation of inflammatory response to antigenic stimulus (GO:0002861)	03/137	0.491226	CD163 - FCGR3A - MYH9
	regulation of blood circulation (GO:1903522)	01/35	0.492935	AGT
	cellular response to amyloid-beta (GO:1904646)	01/35	0.492935	IGF1
	cellular response to virus (GO:0098586)	01/35	0.492935	HSP90AA1
	regulation of muscle cell differentiation (GO:0051147)	01/35	0.492935	IGF2
	embryonic skeletal system development (GO:0048706)	01/35	0.492935	RBP4
	respiratory system development (GO:0060541)	01/35	0.492935	RBP4
	semaphorin-plexin signaling pathway (GO:0071526)	01/35	0.492935	FLNA
	lung development (GO:0030324)	01/35	0.492935	RBP4
	negative regulation of neurogenesis (GO:0050768)	01/35	0.492935	B2M
	oxoacid metabolic process (GO:0043436)	01/35	0.492935	MINPP1
	positive regulation of cell cycle G1&&S phase transition (GO:1902808)	01/35	0.492935	CRNN
	regulation of interferon-gamma production (GO:0032649)	02/86	0.493882	HLA-A - CD14
	glucose homeostasis (GO:0042593)	02/86	0.493882	RBP4 - ADIPOQ
	transport across blood-brain barrier (GO:0150104)	02/86	0.493882	ABCC4 - TFRC
	ERAD pathway (GO:0036503)	02/87	0.499999	HSPA5 - HSP90B1
	regulation of cell population proliferation (GO:0042127)	15/764	0.50209	TFRC - IGFBP3 - FN1 - IGF2 - PLG - IGF1 - CLU - THBS1 - AGT - AZGP1 - CDH13 - IGFBP6 - HRG - GPLD1 - PF4
	regulation of androgen receptor signaling pathway (GO:0060765)	01/36	0.502688	H4-16
	regulation of cell cycle G1&&S phase transition (GO:1902806)	01/36	0.502688	CRNN
	regulation of defense response to virus by host (GO:0050691)	01/36	0.502688	HSP90AA1
	regulation of embryonic development (GO:0045995)	01/36	0.502688	CFL1
	dendrite morphogenesis (GO:0048813)	01/36	0.502688	CELSR2
	regulation of receptor internalization (GO:0002090)	01/36	0.502688	PCSK9
	establishment of protein localization to plasma membrane (GO:0061951)	01/36	0.502688	OPTN
	telomere maintenance via telomere lengthening (GO:0010833)	01/36	0.502688	HSP90AA1
	negative regulation of cellular protein localization (GO:1903828)	01/36	0.502688	ADIPOQ
	negative regulation of DNA metabolic process (GO:0051053)	01/36	0.502688	ADIPOQ
	negative regulation of fat cell differentiation (GO:0045599)	01/36	0.502688	ADIPOQ
	negative regulation of toll-like receptor signaling pathway (GO:0034122)	01/36	0.502688	CD14
	positive regulation of bone mineralization (GO:0030501)	01/36	0.502688	LTF
	positive regulation of innate immune response (GO:0045089)	01/36	0.502688	LBP
	positive regulation of interferon-beta production (GO:0032728)	01/36	0.502688	HSP90AA1
	positive regulation of myeloid leukocyte differentiation (GO:0002763)	01/36	0.502688	PF4
	regulation of establishment of planar polarity (GO:0090175)	02/88	0.506068	PFN1 - CELSR2
	positive regulation of neuron projection development (GO:0010976)	02/88	0.506068	APOE - S100A9
	regulation of type I interferon production (GO:0032479)	02/89	0.512089	CD14 - GAPDH
	second-messenger-mediated signaling (GO:0019932)	02/89	0.512089	APOE - AGT
	transforming growth factor beta receptor signaling pathway (GO:0007179)	02/89	0.512089	CDH5 - APOA1
	centromere complex assembly (GO:0034508)	01/37	0.512254	H4-16
	regulation of intracellular steroid hormone receptor signaling pathway (GO:0033143)	01/37	0.512254	H4-16
	regulation of protein autophosphorylation (GO:0031952)	01/37	0.512254	ADIPOQ
	skeletal muscle tissue development (GO:0007519)	01/37	0.512254	MYL6
	lysosome localization (GO:0032418)	01/37	0.512254	MYH9
	neural crest cell migration (GO:0001755)	01/37	0.512254	FN1
	negative regulation of macromolecule metabolic process (GO:0010605)	04/194	0.513191	PCSK9 - APOE - IGF1 - OPTN
	protein localization to organelle (GO:0033365)	03/142	0.515152	OBSCN - LAMP2 - OPTN
	protein complex oligomerization (GO:0051259)	02/90	0.518061	C9 - CARD9
	connective tissue development (GO:0061448)	01/38	0.521636	CD44
	regulation of phosphoprotein phosphatase activity (GO:0043666)	01/38	0.521636	HSP90B1
	response to cAMP (GO:0051591)	01/38	0.521636	RAP1B
	histone exchange (GO:0043486)	01/38	0.521636	H4-16
	negative regulation of ubiquitin-dependent protein catabolic process (GO:2000059)	01/38	0.521636	CSNK2A2
	positive regulation of potassium ion transport (GO:0043268)	01/38	0.521636	FLNA
	positive regulation of production of molecular mediator of immune response (GO:0002702)	01/38	0.521636	RBP4
	positive regulation of signaling (GO:0023056)	01/38	0.521636	ADIPOQ
	negative regulation of cell migration (GO:0030336)	03/144	0.524553	IGFBP3 - ADIPOQ - VCL
	negative regulation of intracellular signal transduction (GO:1902532)	04/198	0.529235	TMSB4X - ADIPOQ - ITPR1 - THBS1
	T cell activation (GO:0042110)	02/92	0.52986	LCP1 - CD44
	regulation of heart rate by cardiac conduction (GO:0086091)	01/39	0.530838	DSG2
	regulation of intracellular transport (GO:0032386)	01/39	0.530838	LCP1
	DNA replication-independent nucleosome assembly (GO:0006336)	01/39	0.530838	H4-16
	regulation of protein targeting to mitochondrion (GO:1903214)	01/39	0.530838	CSNK2A2
	regulation of protein tyrosine kinase activity (GO:0061097)	01/39	0.530838	AGT
	replication fork processing (GO:0031297)	01/39	0.530838	ZGRF1
	membrane protein proteolysis (GO:0033619)	01/39	0.530838	MYH9
	negative regulation of protein secretion (GO:0050709)	01/39	0.530838	APOE
	negative regulation of secretion by cell (GO:1903531)	01/39	0.530838	APOE
	regulation of epithelial cell proliferation (GO:0050678)	02/93	0.535685	IGF1 - B2M
	regulation of heart contraction (GO:0008016)	02/93	0.535685	ITPR1 - AGT
	regulation of macromolecule metabolic process (GO:0060255)	04/200	0.537161	CRNN - APOE - IGF1 - HRG
	bone development (GO:0060348)	01/40	0.539863	LTF
	regulation of microtubule polymerization (GO:0031113)	01/40	0.539863	CDH5
	regulation of sodium ion transmembrane transporter activity (GO:2000649)	01/40	0.539863	PCSK9
	lymphocyte migration (GO:0072676)	01/40	0.539863	SAA1
	negative regulation of I-kappaB kinase&&NF-kappaB signaling (GO:0043124)	01/40	0.539863	ADIPOQ
	regulation of kinase activity (GO:0043549)	02/94	0.541461	EEF1A1 - TTN
	negative regulation of cell death (GO:0060548)	02/94	0.541461	ALB - CLU
	regulation of cytosolic calcium ion concentration (GO:0051480)	03/148	0.543051	SAA1 - F2 - KNG1
	positive regulation of intracellular protein transport (GO:0090316)	03/148	0.543051	CSNK2A2 - FLNA - YWHAZ
	positive regulation of transferase activity (GO:0051347)	03/148	0.543051	HSP90AA1 - ADIPOQ - IGF2
	ciliary basal body-plasma membrane docking (GO:0097711)	02/95	0.547186	HSP90AA1 - TUBB4B
	cortical cytoskeleton organization (GO:0030865)	01/41	0.548716	LCP1
	epithelial cell migration (GO:0010631)	01/41	0.548716	CDH13
	heart contraction (GO:0060047)	01/41	0.548716	TTN
	positive regulation of cation transmembrane transport (GO:1904064)	01/41	0.548716	FLNA
	response to cytokine (GO:0034097)	03/150	0.552143	CRNN - ITIH4 - ADIPOQ
	calcium ion transmembrane import into cytosol (GO:0097553)	01/42	0.557398	ITPR1
	regulation of chemokine production (GO:0032642)	01/42	0.557398	C5
	skeletal system morphogenesis (GO:0048705)	01/42	0.557398	LTF
	nucleic acid-templated transcription (GO:0097659)	01/42	0.557398	XAB2
	positive regulation of ATPase activity (GO:0032781)	01/42	0.557398	PFN1
	positive regulation of protein tyrosine kinase activity (GO:0061098)	01/42	0.557398	AGT
	positive regulation of cold-induced thermogenesis (GO:0120162)	02/97	0.558487	ADIPOQ - DBH
	negative regulation of neuron death (GO:1901215)	02/98	0.564062	AGAP2 - APOE
	anion transport (GO:0006820)	01/43	0.565914	SLC4A1
	regulation of cell-substrate adhesion (GO:0010810)	01/43	0.565914	PLG
	cellular glucose homeostasis (GO:0001678)	01/43	0.565914	ERN1
	cellular response to glucose starvation (GO:0042149)	01/43	0.565914	HSPA5
	signal release from synapse (GO:0099643)	01/43	0.565914	HSPA8
	substantia nigra development (GO:0021762)	01/43	0.565914	HSPA5
	positive regulation of phospholipase C activity (GO:0010863)	01/43	0.565914	ANG
	positive regulation of stress-activated MAPK cascade (GO:0032874)	02/99	0.569586	SERPINF2 - CARD9
	response to amyloid-beta (GO:1904645)	01/44	0.574266	IGF1
	intracellular protein transmembrane transport (GO:0065002)	01/44	0.574266	HSPA5
	lymphocyte chemotaxis (GO:0048247)	01/44	0.574266	SAA1
	mitotic spindle assembly (GO:0090307)	01/44	0.574266	FLNA
	mRNA catabolic process (GO:0006402)	01/44	0.574266	ERN1
	neurogenesis (GO:0022008)	01/44	0.574266	PCSK9
	neurotransmitter secretion (GO:0007269)	01/44	0.574266	HSPA8
	positive regulation of potassium ion transmembrane transport (GO:1901381)	01/44	0.574266	FLNA
	regulation of transforming growth factor beta receptor signaling pathway (GO:0017015)	02/100	0.575059	THBS1 - VASN
	positive regulation of cell cycle process (GO:0090068)	02/101	0.580482	IGF2 - IGF1
	regulation of receptor signaling pathway via JAK-STAT (GO:0046425)	01/45	0.582458	F2
	positive regulation of RNA metabolic process (GO:0051254)	01/45	0.582458	ERN1
	protein deacetylation (GO:0006476)	01/45	0.582458	FLNA
	intrinsic apoptotic signaling pathway (GO:0097193)	02/102	0.585853	ERN1 - ITPR1
	regulation of B cell proliferation (GO:0030888)	01/46	0.590493	TFRC
	regulation of telomerase activity (GO:0051972)	01/46	0.590493	HSP90AA1
	positive regulation of nucleocytoplasmic transport (GO:0046824)	01/46	0.590493	FLNA
	positive regulation of organelle assembly (GO:1902117)	01/46	0.590493	LCP1
	cellular response to organonitrogen compound (GO:0071417)	02/103	0.591174	RAP1B - HSP90B1
	regulation of insulin secretion (GO:0050796)	02/104	0.596443	RBP4 - ITPR1
	translational elongation (GO:0006414)	02/104	0.596443	EEF1A1 - EEF2
	regulation of cellular metabolic process (GO:0031323)	01/47	0.598374	CNDP1
	regulation of DNA binding (GO:0051101)	01/47	0.598374	IGF1
	regulation of synapse assembly (GO:0051963)	01/47	0.598374	IL1RAP
	telomere organization (GO:0032200)	01/47	0.598374	H4-16
	negative regulation of cold-induced thermogenesis (GO:0120163)	01/47	0.598374	ADIPOQ
	polyol metabolic process (GO:0019751)	01/47	0.598374	MINPP1
	positive regulation of pathway-restricted SMAD protein phosphorylation (GO:0010862)	01/47	0.598374	INHBC
	cellular response to alcohol (GO:0097306)	01/48	0.606103	GPLD1
	cellular response to ionizing radiation (GO:0071479)	01/48	0.606103	PRAP1
	regulation of mitochondrion organization (GO:0010821)	01/48	0.606103	CSNK2A2
	Golgi to plasma membrane transport (GO:0006893)	01/48	0.606103	OPTN
	inositol phosphate metabolic process (GO:0043647)	01/48	0.606103	MINPP1
	myelination (GO:0042552)	01/48	0.606103	ADGRG6
	positive regulation of protein serine&&threonine kinase activity (GO:0071902)	02/106	0.60683	ADIPOQ - LTF
	aminoglycan biosynthetic process (GO:0006023)	01/49	0.613684	HSPG2
	receptor internalization (GO:0031623)	01/49	0.613684	TFRC
	regulation of interferon-beta production (GO:0032648)	01/49	0.613684	HSP90AA1
	RNA catabolic process (GO:0006401)	01/49	0.613684	ERN1
	negative regulation of cell projection organization (GO:0031345)	01/49	0.613684	APOE
	regulation of neuron projection development (GO:0010975)	03/165	0.616783	CFL1 - APOE - S100A9
	negative regulation of canonical Wnt signaling pathway (GO:0090090)	03/165	0.616783	IGFBP4 - APOE - IGFBP6
	regulation of cellular component movement (GO:0051270)	01/50	0.62112	ACTN1
	chloride transmembrane transport (GO:1902476)	01/50	0.62112	APOL1
	regulation of interleukin-12 production (GO:0032655)	01/51	0.628412	THBS1
	inositol lipid-mediated signaling (GO:0048017)	01/51	0.628412	IGF1
	negative regulation of transport (GO:0051051)	01/51	0.628412	ADIPOQ
	regulation of protein serine&&threonine kinase activity (GO:0071900)	02/111	0.631905	MST1 - LTF
	fatty acid beta-oxidation (GO:0006635)	01/52	0.635565	ADIPOQ
	bicellular tight junction assembly (GO:0070830)	01/53	0.64258	CDH5
	heart morphogenesis (GO:0003007)	01/53	0.64258	TTN
	positive regulation of macroautophagy (GO:0016239)	01/53	0.64258	OPTN
	positive regulation of NIK&&NF-kappaB signaling (GO:1901224)	01/53	0.64258	CD14
	positive regulation of kinase activity (GO:0033674)	02/114	0.646342	AGAP2 - F2
	regulation of potassium ion transmembrane transport (GO:1901379)	01/54	0.649461	FLNA
	regulation of proteasomal protein catabolic process (GO:0061136)	01/54	0.649461	APOE
	glycosaminoglycan metabolic process (GO:0030203)	01/54	0.649461	HSPG2
	inorganic anion transport (GO:0015698)	01/54	0.649461	SLC4A1
	unsaturated fatty acid metabolic process (GO:0033559)	01/54	0.649461	PNPLA8
	negative regulation of viral genome replication (GO:0045071)	01/54	0.649461	LTF
	cellular amide metabolic process (GO:0043603)	02/115	0.651054	BTD - CPN1
	protein targeting to mitochondrion (GO:0006626)	01/55	0.65621	HSP90AA1
	regulation of gene silencing by RNA (GO:0060966)	01/55	0.65621	H4-16
	regulation of posttranscriptional gene silencing (GO:0060147)	01/55	0.65621	H4-16
	glycoprotein metabolic process (GO:0009100)	01/55	0.65621	ADAMTS13
	blood vessel morphogenesis (GO:0048514)	01/56	0.662828	SERPINF2
	DNA damage response, signal transduction by p53 class mediator resulting in cell cycle arrest (GO:0006977)	01/56	0.662828	PRAP1
	sensory organ development (GO:0007423)	01/56	0.662828	RBP4
	telomere maintenance (GO:0000723)	01/56	0.662828	H4-16
	tight junction assembly (GO:0120192)	01/56	0.662828	CDH5
	mitochondrial transport (GO:0006839)	01/56	0.662828	HSP90AA1
	peptidyl-tyrosine modification (GO:0018212)	01/56	0.662828	EFEMP1
	adenylate cyclase-activating G protein-coupled receptor signaling pathway (GO:0007189)	02/118	0.664891	ADGRG6 - PF4
	regulation of cellular response to stress (GO:0080135)	02/118	0.664891	HSPA8 - HSP90AA1
	regulation of translation (GO:0006417)	03/178	0.667479	EEF2 - GAPDH - THBS1
	cellular response to peptide (GO:1901653)	01/57	0.66932	IGF1
	monocarboxylic acid transport (GO:0015718)	01/57	0.66932	ABCC4
	negative regulation of DNA recombination (GO:0045910)	01/57	0.66932	H4-16
	cytoskeleton organization (GO:0007010)	02/120	0.673868	CFL1 - APOE
	macroautophagy (GO:0016236)	02/120	0.673868	LAMP2 - CSNK2A2
	receptor metabolic process (GO:0043112)	01/58	0.675688	TFRC
	regulation of pathway-restricted SMAD protein phosphorylation (GO:0060393)	01/58	0.675688	INHBC
	fat cell differentiation (GO:0045444)	01/58	0.675688	ADIPOQ
	negative regulation of neuron projection development (GO:0010977)	01/58	0.675688	APOE
	nucleosome assembly (GO:0006334)	01/58	0.675688	H4-16
	regulation of secretion by cell (GO:1903530)	01/59	0.681932	SAA1
	fatty acid oxidation (GO:0019395)	01/59	0.681932	ADIPOQ
	negative regulation of autophagy (GO:0010507)	01/59	0.681932	QSOX1
	positive regulation of tyrosine phosphorylation of STAT protein (GO:0042531)	01/59	0.681932	IGF1
	regulation of mRNA catabolic process (GO:0061013)	02/122	0.68265	HSPA8 - YWHAZ
	epithelium development (GO:0060429)	02/122	0.68265	TAGLN2 - VCL
	membrane organization (GO:0061024)	04/242	0.685959	HSPA8 - TF - TFRC - APOB
	cellular response to organic substance (GO:0071310)	02/123	0.686967	CRNN - CLEC3B
	adenylate cyclase-inhibiting G protein-coupled receptor signaling pathway (GO:0007193)	01/60	0.688057	FLNA
	cellular protein catabolic process (GO:0044257)	01/60	0.688057	PCSK9
	peptidyl-threonine phosphorylation (GO:0018107)	01/60	0.688057	CSNK2A2
	defense response to symbiont (GO:0140546)	02/124	0.691237	FCN3 - FLNA
	non-canonical Wnt signaling pathway (GO:0035567)	02/124	0.691237	PFN1 - CELSR2
	antigen receptor-mediated signaling pathway (GO:0050851)	03/185	0.692679	IGLL5 - IGLL1 - HLA-A
	positive regulation of cell population proliferation (GO:0008284)	08/474	0.692988	SERPINF2 - FN1 - IGF2 - CDH13 - IGF1 - THBS1 - AGT - LTF
	positive regulation of DNA biosynthetic process (GO:2000573)	01/61	0.694065	HSP90AA1
	protein lipidation (GO:0006497)	01/61	0.694065	GPLD1
	negative regulation of growth (GO:0045926)	02/126	0.699632	ENO1 - HRG
	double-strand break repair via nonhomologous end joining (GO:0006303)	01/62	0.699957	H4-16
	response to retinoic acid (GO:0032526)	01/62	0.699957	RBP4
	I-kappaB kinase&&NF-kappaB signaling (GO:0007249)	01/62	0.699957	CD14
	negative regulation of kinase activity (GO:0033673)	01/62	0.699957	PPIA
	positive regulation of cysteine-type endopeptidase activity (GO:2001056)	01/62	0.699957	CARD9
	anterior&&posterior pattern specification (GO:0009952)	01/63	0.705735	CELSR2
	positive regulation of viral process (GO:0048524)	01/63	0.705735	PPIA
	protein secretion (GO:0009306)	01/64	0.711403	FGG
	negative regulation of Wnt signaling pathway (GO:0030178)	03/191	0.713114	IGFBP4 - APOE - IGFBP6
	regulation of primary metabolic process (GO:0080090)	02/130	0.715855	SERPINA3 - APOE
	Golgi organization (GO:0007030)	02/130	0.715855	YWHAZ - OPTN
	regulation of cellular catabolic process (GO:0031329)	01/65	0.716962	ITPR1
	cellular response to type I interferon (GO:0071357)	01/65	0.716962	HLA-A
	G protein-coupled receptor signaling pathway, coupled to cyclic nucleotide second messenger (GO:0007187)	01/65	0.716962	AGT
	inorganic anion transmembrane transport (GO:0098661)	01/65	0.716962	APOL1
	steroid biosynthetic process (GO:0006694)	01/65	0.716962	SERPINA6
	type I interferon signaling pathway (GO:0060337)	01/65	0.716962	HLA-A
	mitotic G1 DNA damage checkpoint signaling (GO:0031571)	01/65	0.716962	PRAP1
	embryonic organ development (GO:0048568)	01/66	0.722414	RBP4
	regulation of protein localization (GO:0032880)	01/66	0.722414	HSP90AA1
	cilium assembly (GO:0060271)	05/314	0.723506	ABCC4 - HSP90AA1 - GSN - FLNA - TUBB4B
	protein localization to membrane (GO:0072657)	03/195	0.726147	PIGR - ADIPOQ - FLNA
	defense response to virus (GO:0051607)	02/133	0.727535	FCN3 - FLNA
	transmembrane receptor protein serine&&threonine kinase signaling pathway (GO:0007178)	02/133	0.727535	CDH5 - APOA1
	regulation of gene silencing by miRNA (GO:0060964)	01/67	0.727761	H4-16
	vascular endothelial growth factor receptor signaling pathway (GO:0048010)	01/67	0.727761	HSP90AA1
	peptidyl-threonine modification (GO:0018210)	01/67	0.727761	CSNK2A2
	regulation of tyrosine phosphorylation of STAT protein (GO:0042509)	01/68	0.733006	IGF1
	negative regulation of transforming growth factor beta receptor signaling pathway (GO:0030512)	01/68	0.733006	VASN
	regulation of intracellular signal transduction (GO:1902531)	07/437	0.737399	CRNN - OBSCN - VWF - TMSB4X - CSNK2A2 - A2M - OPTN
	cellular response to calcium ion (GO:0071277)	01/69	0.738149	GPLD1
	peptidyl-tyrosine phosphorylation (GO:0018108)	01/69	0.738149	EFEMP1
	protein localization to plasma membrane (GO:0072659)	02/136	0.738806	ADIPOQ - FLNA
	cellular calcium ion homeostasis (GO:0006874)	02/136	0.738806	CDH5 - F2
	ribonucleoprotein complex assembly (GO:0022618)	02/136	0.738806	XAB2 - HSP90AA1
	fatty acid catabolic process (GO:0009062)	01/70	0.743194	ADIPOQ
	snRNA transcription by RNA polymerase II (GO:0042795)	01/70	0.743194	INTS11
	negative regulation of gene expression (GO:0010629)	05/322	0.743492	ERN1 - H4-16 - APOE - IGF1 - GAPDH
	regulation of glycolytic process (GO:0006110)	01/71	0.748142	IGF1
	gland development (GO:0048732)	01/71	0.748142	PCSK9
	snRNA transcription (GO:0009301)	01/71	0.748142	INTS11
	myeloid leukocyte differentiation (GO:0002573)	01/71	0.748142	MYH9
	phosphatidylinositol-mediated signaling (GO:0048015)	01/71	0.748142	IGF1
	neuron projection morphogenesis (GO:0048812)	02/140	0.753215	ACTBL2 - CELSR2
	protein localization to cell periphery (GO:1990778)	02/140	0.753215	ADIPOQ - FLNA
	regulation of small GTPase mediated signal transduction (GO:0051056)	02/141	0.756708	OBSCN - A2M
	regulation of actin filament polymerization (GO:0030833)	01/73	0.757755	PFN1
	regulation of actin filament-based process (GO:0032970)	01/73	0.757755	HRG
	chromatin assembly (GO:0031497)	01/73	0.757755	H4-16
	transcription-coupled nucleotide-excision repair (GO:0006283)	01/73	0.757755	XAB2
	neurotransmitter transport (GO:0006836)	01/73	0.757755	HSPA8
	DNA damage response, signal transduction by p53 class mediator (GO:0030330)	01/74	0.762423	PRAP1
	mitotic nuclear division (GO:0140014)	01/74	0.762423	FLNA
	negative regulation of DNA-binding transcription factor activity (GO:0043433)	02/143	0.763567	TMSB4X - FLNA
	positive regulation of immune response (GO:0050778)	01/75	0.767001	HRG
	positive regulation of lymphocyte proliferation (GO:0050671)	01/75	0.767001	TFRC
	mitotic cell cycle phase transition (GO:0044772)	03/209	0.768131	HSP90AA1 - TUBB4B - OPTN
	regulation of BMP signaling pathway (GO:0030510)	01/76	0.771492	CDH5
	regulation of epithelial to mesenchymal transition (GO:0010717)	01/76	0.771492	VASN
	establishment of protein localization to organelle (GO:0072594)	01/76	0.771492	LAMP2
	regulation of RNA splicing (GO:0043484)	01/76	0.771492	ERN1
	regulation of T cell proliferation (GO:0042129)	01/76	0.771492	TFRC
	regulation of mRNA stability (GO:0043488)	02/146	0.773542	HSPA8 - YWHAZ
	regulation of organelle assembly (GO:1902115)	01/77	0.775896	GSN
	phosphate-containing compound metabolic process (GO:0006796)	03/212	0.776413	MINPP1 - LCAT - ALDOA
	positive regulation of cytosolic calcium ion concentration (GO:0007204)	02/147	0.776784	SAA1 - KNG1
	protein modification process (GO:0036211)	01/78	0.780215	CDKL3
	regulation of G2&&M transition of mitotic cell cycle (GO:0010389)	02/149	0.783148	HSP90AA1 - TUBB4B
	axon development (GO:0061564)	01/79	0.784451	ACTBL2
	negative regulation of NF-kappaB transcription factor activity (GO:0032088)	01/79	0.784451	TMSB4X
	positive regulation of proteasomal ubiquitin-dependent protein catabolic process (GO:0032436)	01/79	0.784451	CLU
	positive regulation of ubiquitin-dependent protein catabolic process (GO:2000060)	01/79	0.784451	CLU
	brain development (GO:0007420)	02/150	0.786269	APOD - HSPG2
	cellular response to organic cyclic compound (GO:0071407)	02/150	0.786269	RAP1B - HSP90B1
	regulation of fat cell differentiation (GO:0045598)	01/80	0.788606	ADIPOQ
	response to interferon-gamma (GO:0034341)	01/80	0.788606	GAPDH
	phospholipase C-activating G protein-coupled receptor signaling pathway (GO:0007200)	01/81	0.792681	AGT
	regulation of G protein-coupled receptor signaling pathway (GO:0008277)	01/82	0.796678	C3
	positive regulation of cytoskeleton organization (GO:0051495)	01/82	0.796678	PFN1
	glycoprotein biosynthetic process (GO:0009101)	01/83	0.800598	IGF1
	long-chain fatty acid metabolic process (GO:0001676)	01/83	0.800598	PNPLA8
	positive regulation of plasma membrane bounded cell projection assembly (GO:0120034)	01/83	0.800598	PFN1
	regulation of cell differentiation (GO:0045595)	02/156	0.804182	SERPINF2 - IGF2
	peptidyl-serine phosphorylation (GO:0018105)	02/156	0.804182	ERN1 - CSNK2A2
	spindle assembly (GO:0051225)	01/84	0.804442	FLNA
	regulation of Ras protein signal transduction (GO:0046578)	01/86	0.811911	IGF1
	positive regulation of proteasomal protein catabolic process (GO:1901800)	01/86	0.811911	CLU
	cilium organization (GO:0044782)	03/228	0.81657	ABCC4 - GSN - FLNA
	metal ion transport (GO:0030001)	01/88	0.819095	ITPR1
	post-Golgi vesicle-mediated transport (GO:0006892)	01/89	0.822584	HSPA8
	apoptotic process (GO:0006915)	03/231	0.823379	CD14 - PPIA - GAPDH
	heart development (GO:0007507)	02/164	0.825988	RBP4 - FN1
	regulation of mRNA splicing, via spliceosome (GO:0048024)	01/90	0.826005	PRDX6
	negative regulation of protein kinase activity (GO:0006469)	01/90	0.826005	PPIA
	negative regulation of translation (GO:0017148)	01/90	0.826005	GAPDH
	positive regulation of autophagy (GO:0010508)	01/90	0.826005	OPTN
	adenylate cyclase-modulating G protein-coupled receptor signaling pathway (GO:0007188)	02/165	0.828555	ADGRG6 - PF4
	regulation of actin cytoskeleton organization (GO:0032956)	01/91	0.829361	HRG
	regulation of gene expression (GO:0010468)	17/1079	0.831621	CRP - GSN - TFRC - FN1 - IGF2 - IGF1 - CELSR2 - CLU - TTN - CRNN - CDH5 - EFEMP1 - APOE - HRG - RBAK - PF4 - LTF
	cellular response to fibroblast growth factor stimulus (GO:0044344)	01/92	0.832652	CD44
	Wnt signaling pathway (GO:0016055)	01/92	0.832652	CELSR2
	visual perception (GO:0007601)	01/93	0.83588	EFEMP1
	interleukin-1-mediated signaling pathway (GO:0070498)	01/94	0.839046	IL1RAP
	nucleosome organization (GO:0034728)	01/94	0.839046	H4-16
	sensory perception of light stimulus (GO:0050953)	01/95	0.842151	EFEMP1
	mRNA metabolic process (GO:0016071)	01/95	0.842151	ERN1
	regulation of vesicle-mediated transport (GO:0060627)	01/96	0.845196	CDH13
	calcium ion homeostasis (GO:0055074)	01/97	0.848182	CDH5
	response to UV (GO:0009411)	01/99	0.853984	CAT
	cellular macromolecule biosynthetic process (GO:0034645)	04/314	0.856005	EEF1A1 - XAB2 - APOE - EEF2
	organic acid transport (GO:0015849)	01/100	0.856802	ABCC4
	epithelial cell differentiation (GO:0030855)	01/101	0.859565	TAGLN2
	positive regulation of protein localization to membrane (GO:1905477)	01/101	0.859565	YWHAZ
	regulation of proteasomal ubiquitin-dependent protein catabolic process (GO:0032434)	01/102	0.862275	CLU
	antigen processing and presentation of exogenous peptide antigen (GO:0002478)	01/103	0.864933	HLA-A
	regulation of canonical Wnt signaling pathway (GO:0060828)	03/253	0.867005	IGFBP4 - APOE - IGFBP6
	cellular metal ion homeostasis (GO:0006875)	01/104	0.867539	CDH5
	steroid metabolic process (GO:0008202)	01/104	0.867539	GC
	nucleotide-excision repair (GO:0006289)	01/105	0.870096	XAB2
	regulation of cell cycle process (GO:0010564)	01/106	0.872603	CSNK2A2
	chromosome organization (GO:0051276)	01/106	0.872603	H4-16
	small GTPase mediated signal transduction (GO:0007264)	01/106	0.872603	IGF1
	negative regulation of transmembrane receptor protein serine&&threonine kinase signaling pathway (GO:0090101)	01/108	0.877474	VASN
	regulation of mitotic cell cycle phase transition (GO:1901990)	02/188	0.878896	HSP90AA1 - TUBB4B
	regulation of protein ubiquitination (GO:0031396)	01/109	0.879839	HSP90AA1
	modulation of chemical synaptic transmission (GO:0050804)	01/109	0.879839	ADIPOQ
	response to tumor necrosis factor (GO:0034612)	01/110	0.882159	ADIPOQ
	cellular divalent inorganic cation homeostasis (GO:0072503)	01/111	0.884434	CDH5
	Fc receptor signaling pathway (GO:0038093)	01/112	0.886665	PIGR
	transmembrane receptor protein tyrosine kinase signaling pathway (GO:0007169)	05/404	0.890346	HSP90AA1 - MST1 - IGF2 - IGF1 - GPLD1
	calcium ion transport (GO:0006816)	01/115	0.893104	ITPR1
	cellular response to lectin (GO:1990858)	01/115	0.893104	CARD9
	stimulatory C-type lectin receptor signaling pathway (GO:0002223)	01/115	0.893104	CARD9
	ion transport (GO:0006811)	01/116	0.895168	SLC4A1
	sphingolipid metabolic process (GO:0006665)	01/116	0.895168	ENPP2
	tumor necrosis factor-mediated signaling pathway (GO:0033209)	01/116	0.895168	TMSB4X
	innate immune response activating cell surface receptor signaling pathway (GO:0002220)	01/119	0.901126	CARD9
	regulation of anatomical structure morphogenesis (GO:0022603)	01/123	0.908546	CFL1
	protein targeting (GO:0006605)	01/125	0.912046	LAMP2
	plasma membrane bounded cell projection organization (GO:0120036)	01/128	0.917046	APOE
	protein phosphorylation (GO:0006468)	06/496	0.91732	ERN1 - CDKL3 - EFEMP1 - IGFBP3 - CSNK2A2 - YWHAZ
	translation (GO:0006412)	02/214	0.919201	EEF1A1 - EEF2
	regulation of cell cycle (GO:0051726)	03/296	0.925733	ERN1 - CSNK2A2 - THBS1
[truncated: 50 more rows]
